1  
2  
3  
4  
5  
6  
7  
8  
9  
10  
11  
12  
13  
14  
15  
16  
17  
18  
19  
20  
21  
22  
23  
24  
25  
26  
27  
28  
29  
30  
31  
32  
33  
34  
35

**Combinatorial tumor suppressor inactivation efficiently initiates lung adenocarcinoma  
with therapeutic vulnerabilities**

Maryam Yousefi<sup>1,8\*</sup>, Gábor Boross<sup>4,8</sup>, Carly Weiss<sup>4</sup>, Christopher W. Murray<sup>2</sup>, Jess D. Hebert<sup>1</sup>,  
Hongchen Cai<sup>1</sup>, Emily L. Ashkin<sup>2</sup>, Saswati Karmakar<sup>1</sup>, Laura Andrejka<sup>1</sup>, Leo Chen<sup>1</sup>, Minwei  
Wang<sup>1</sup>, Min K. Tsai<sup>1</sup>, Wen-Yang Lin<sup>1</sup>, Chuan Li<sup>4</sup>, Pegah Yakhchalian<sup>7</sup>, Caterina I. Colón<sup>2</sup>, Su-  
Kit Chew<sup>5,6</sup>, Pauline Chu<sup>3</sup>, Charles Swanton<sup>5,6</sup>, Christian A. Kunder<sup>3</sup>, Dmitri A. Petrov<sup>2,4</sup>, Monte  
M. Winslow<sup>1,2,3\*</sup>

<sup>1</sup> Department of Genetics, Stanford University School of Medicine, Stanford, CA, USA

<sup>2</sup> Cancer Biology Program, Stanford University School of Medicine, Stanford, CA, USA

<sup>3</sup> Department of Pathology, Stanford University School of Medicine, Stanford, CA, USA

<sup>4</sup> Department of Biology, Stanford University, Stanford, CA, USA

<sup>5</sup> Cancer Evolution and Genome Instability Laboratory, University College London Cancer Institute, London, UK

<sup>6</sup> Cancer Evolution and Genome Instability Laboratory, The Francis Crick Institute, London, UK

<sup>7</sup> Department of Medicine, David Geffen School of Medicine at University of California, Los Angeles, Los Angeles, CA, USA

<sup>8</sup> These authors contributed equally

\* Corresponding authors:

Monte M. Winslow, Stanford University School of Medicine | 279 Campus Drive, Beckman Center B256, Stanford, CA 94305. Phone: 650-725-8696 | Fax: 650-725-1534 E-mail: [mwinslow@stanford.edu](mailto:mwinslow@stanford.edu)

Maryam Yousefi, Stanford University School of Medicine | 279 Campus Drive, Beckman Center B261, Stanford, CA 94305. Phone: (650) 725-2182 | E-mail: [yousefi@stanford.edu](mailto:yousefi@stanford.edu)

36 **ABSTRACT**

37 Lung cancer is the leading cause of cancer death worldwide, with lung adenocarcinoma  
38 being the most common subtype. Many oncogenes and tumor suppressor genes are altered in this  
39 cancer type and the discovery of oncogene mutations has led to the development of targeted  
40 therapies that have improved clinical outcomes. However, a large fraction of lung  
41 adenocarcinomas lacks mutations in known oncogenes, and the genesis and treatment of these  
42 oncogene-negative tumors remain enigmatic. Here, we perform iterative *in vivo* functional  
43 screens using quantitative autochthonous mouse model systems to uncover the genetic and  
44 biochemical changes that enable efficient lung tumor initiation in the absence of oncogene  
45 alterations. Through the generation of hundreds of diverse combinations of tumor suppressor  
46 alterations, we demonstrate that the inactivation of suppressors of the RAS and PI3K pathways  
47 drive the development of oncogene-negative lung adenocarcinoma. Human genomic data and  
48 histology identified RAS/MAPK and PI3K pathway activation as a common event in oncogene-  
49 negative human lung adenocarcinomas. We demonstrate that these Onc-negative<sup>RAS/PI3K</sup> tumors  
50 and related cell lines are vulnerable to pharmacological inhibition of these signaling axes. These  
51 results transform our understanding of this prevalent yet understudied subtype of lung  
52 adenocarcinoma.

53

54 **INTRODUCTION**

55 Lung cancer is the leading cause of cancer death<sup>1</sup>. Lung adenocarcinoma, the most  
56 prevalent subtype of lung cancer, has frequent alterations in receptor tyrosine kinase and  
57 RAS/RAF pathway oncogenes, including mutations in *EGFR* and *KRAS*<sup>2</sup>. The identification of  
58 driver oncogenes has enabled a shift from toxic chemotherapies to less toxic and more effective

59 therapies that often target the oncogenes<sup>3</sup>. However, approximately 30 percent of lung  
60 adenocarcinomas are thought to lack a driving oncogene<sup>4-6</sup>. Consequently, developing targeted  
61 therapies for these tumors remains a major unmet challenge for precision thoracic oncology.

62 Extensive genomic and transcriptomic studies suggest that neither technical reasons nor  
63 the presence of novel oncogenes likely explain this large and clinically significant population of  
64 lung cancer patients<sup>1, 2, 4-12</sup>. Thus, despite the diagnosis of more than 150,000 patients per year  
65 with oncogene-negative lung adenocarcinomas worldwide, the genetic events and biochemical  
66 pathway changes that drive the initiation and growth of these tumors remain almost entirely  
67 unknown.

68 Oncogenes and tumor suppressor genes are parts of signaling networks that generate and  
69 sustain the biochemical changes that drive tumor initiation and growth<sup>13-16</sup>. Combinatorial  
70 alterations in tumor suppressor genes could co-operate to activate pathways driving oncogene-  
71 negative lung tumors. Human lung adenocarcinoma have complex patterns of mutations across  
72 many putative tumor suppressor genes<sup>4</sup>. However, the ability to predict which combinations of  
73 genomic alterations drive cancer in the absence of oncogene activation based on human genomic  
74 data alone remains challenging. While human genomic data can predict combinations of  
75 genomic mutations as likely cancer drivers when the mutations co-occur at very high frequencies  
76 <sup>17-20</sup>, identifying pathogenic combinations of less frequently mutated genes poses a nearly  
77 insurmountable statistical challenge. Furthermore, the large numbers of mutations in lung  
78 cancers, non-genomic mechanism that often inactivate tumor suppressor genes, and generation of  
79 similar biochemical effects through inactivation of different genes further reduce the ability of  
80 human cancer genomic studies to identify combinatorial alterations that activate driver pathways  
81 in lung cancer <sup>21-24</sup>.

82           Functional genomic studies within autochthonous cancer models can help identify the  
83 pathways involved in tumorigenesis *in vivo*<sup>25</sup>. Here, we leveraged quantitative mouse model  
84 systems to assess the ability of hundreds of combinatorial alterations of tumor suppressor genes,  
85 acting across many different signaling pathways, to generate oncogene-negative lung  
86 adenocarcinomas *in vivo*. We uncover pathway-level changes that drive lung cancer in the  
87 absence of oncogene mutations, translate these findings to human oncogene-negative lung  
88 adenocarcinoma, and leveraged these results to identify therapeutic vulnerabilities.

89

## 90 **RESULTS**

91

### 92 **A large fraction of human lung adenocarcinomas lack oncogene mutations**

93           To better understand the genomics of lung adenocarcinomas that lack oncogene  
94 mutations, we analyzed data from The Cancer Genome Atlas (TCGA) and AACR Genomics  
95 Evidence Neoplasia Information Exchange (GENIE)<sup>26,27</sup>. We classified tumors as oncogene-  
96 positive if they had high-confidence oncogenic alterations in previously described proto-  
97 oncogenes, oncogene-indeterminate if they had alterations of unknown significance in known  
98 proto-oncogenes, and oncogene-negative if they had no alterations in known proto-oncogenes  
99 (**Methods**). Consistent with previous publications, we found that 17-18% of lung  
100 adenocarcinomas were oncogene-negative (**Figure 1a** and **S1a**)<sup>28-30</sup>. Additionally, 15-27% of  
101 lung adenocarcinomas were oncogene-indeterminate and thus 32-45% of lung adenocarcinomas  
102 lack known oncogene mutations. Patients with oncogene-negative, oncogene-indeterminate, and  
103 oncogene-positive lung adenocarcinomas have broadly similar mutational burden and clinical  
104 characteristics (**Figure S1b-e**).



## 105 **Combinatorial tumor suppressor gene inactivation enables lung tumor development**

106 To determine whether combinatorial tumor suppressor gene inactivation can drive lung  
107 tumor initiation in the absence of oncogene activation, we coupled Cre/*loxP*-based genetically  
108 engineered mouse models and somatic CRISPR/Cas9-based genome editing with tumor  
109 barcoding and high-throughput barcode sequencing (Tuba-seq)<sup>31-35</sup>. We used Cre/*loxP* to  
110 inactivate each of five “core” tumor suppressor genes (*Trp53*, *Lkb1/Stk11*, *Keap1*, *Nf1*, and  
111 *Pten*). These genes are within diverse pathways and are frequently inactivated in human lung  
112 cancers, including oncogene-negative lung adenocarcinomas (**Figure S2a-b**) [35-38]. We used  
113 CRISPR/Cas9 to coincidentally inactivate panels of additional tumor suppressor genes in lung  
114 epithelial cells in mice with floxed alleles of each of the “core” tumor suppressors, a Cre-reporter  
115 allele (*R26<sup>LSL-Tom</sup> (T)*<sup>36</sup>), and a Cre-regulated *Cas9* allele (*H11<sup>LSL-Cas9</sup> (C)*<sup>37</sup>).

116 We transduced *Nf1<sup>ff</sup>;TC*, *Pten<sup>ff</sup>;TC*, *Trp53<sup>ff</sup>;TC*, *Lkb1<sup>ff</sup>;TC*, *Keap1<sup>ff</sup>;TC*, *TC*, and *T* mice  
117 with two pools of barcoded Lenti-sgRNA/*Cre* vectors that target ~50 putative tumor suppressor  
118 genes that we previously investigated in KRAS<sup>G12D</sup>-driven lung tumors (Lenti-sg*TS15/Cre* and  
119 Lenti-sg*TS102/Cre*) (**Figure 1b, S2c-d, S3a, and Table S1**)<sup>31, 32, 35</sup>. The mutation frequency of  
120 these genes varied, and mutations in some were enriched in oncogene-negative human lung  
121 adenocarcinomas (**Table S1**) (**Figure S2c-d**). The combination of Cre/*LoxP* and CRISPR/Cas9-  
122 based genome editing should generate hundreds of combinations of genomic alterations in lung  
123 epithelial cells. We previously found that a small percent of lung tumors initiated with Lenti-  
124 sgRNA/*Cre* vectors in other lung cancer models contained multiple sgRNAs, consistent with the  
125 transduction of the initial cell with multiple Lenti-sgRNA/*Cre* vectors<sup>31, 32</sup>. Thus, we used a high  
126 titer of the Lenti-sgRNA/*Cre* pools in these experiments to increase the likelihood of finding  
127 higher-order genetic interactions that drive tumorigenesis.

128 One year after transduction with the Lenti-sgRNA/Cre pools, *Nf1<sup>ff</sup>;TC*, *Pten<sup>ff</sup>;TC*, and  
129 *Trp53<sup>ff</sup>;TC* mice developed a modest number of tumors (defined as Tomato<sup>positive</sup> expansion >0.5  
130 mm in diameter), while *Lkb1<sup>ff</sup>;TC* and *Keap1<sup>ff</sup>;TC* mice rarely developed any tumors (**Figure**  
131 **1c-d, S3b-c**). Interestingly, *Nf1<sup>ff</sup>;TC*, *Pten<sup>ff</sup>;TC*, and *Trp53<sup>ff</sup>;TC*, and *TC* mice transduced with  
132 the larger Lenti-sg*TSL02*/Cre pool developed many more tumors than those transduced with the  
133 Lenti-sg*TSL15*/Cre pool. These tumors were positive for TTF1/NKX2-1, a marker for lung  
134 adenocarcinoma, and negative for P63 and UCHL1, markers for squamous cell and small cell  
135 lung cancer, respectively (**Figure 1e**).

136 To determine whether these tumors contained spontaneous oncogene mutations, we PCR-  
137 amplified and sequenced 10 genomic regions in *Kras*, *Braf*, *Nras*, and *Egfr* (**Figure S3d, Table**  
138 **S2, and Methods**)<sup>33, 38-46</sup>. Across 29 samples, we detected only one oncogene mutation (a  
139 *Kras*<sup>G12V</sup> mutation in a tumor from a *Pten<sup>ff</sup>;TC* mouse). Thus, the majority of these tumors arose  
140 in the absence of hotspot mutations in these proto-oncogenes. This is consistent with the low  
141 mutation rate in mouse models of lung cancer<sup>47</sup> and suggests that the inactivation of  
142 combinations of specific tumor suppressor genes in *Nf1<sup>ff</sup>;TC*, *Pten<sup>ff</sup>;TC*, and *Trp53<sup>ff</sup>;TC* mice  
143 drives the development of lung cancer *in vivo*. Notably, the overall low number of tumors  
144 indicates that inactivation of the “core” tumor suppressor genes alone, and most combinations of  
145 tumor suppressor genes tested, are insufficient to generate lung tumors.

146

## 147 **Identification of top candidate tumor suppressor genes involved in oncogene-negative lung** 148 **tumor formation**

149 The Lenti-sgRNA/Cre vectors contain two-component barcodes in which an sgID  
150 identifies the sgRNA and a random barcode (BC) uniquely tags each clonal tumor. Thus, high

151 throughput sequencing of the sgID-BC region can identify the sgRNA(s) present in each tumor  
152 and quantify the number of cancer cells in each tumor (**Figure 1b**). To determine which  
153 sgRNAs were present in the largest tumors, we PCR-amplified the sgID-BC region from  
154 genomic DNA from dissected tumors and performed high-throughput sgID-BC sequencing.  
155 Most large tumors contained multiple Lenti-sgRNA/*Cre* vectors therefore, we calculated the  
156 statistical enrichment of each sgRNA based on their relative representation in the dissected  
157 tumors (**Figure 1f** and **S4**, see **Methods**).

158 To further quantify the impact of inactivating each tumor suppressor gene on clonal  
159 expansion of lung epithelial cells, we performed tumor barcode sequencing (Tuba-seq) on bulk  
160 DNA from one lung lobe from each *Nf1<sup>ff</sup>;TC*, *Pten<sup>ff</sup>;TC*, *Trp53<sup>ff</sup>;TC*, and *TC* mouse (**Figure**  
161 **1c**). Analysis of the number of cells in clonal expansions further nominated tumor suppressor  
162 genes that may contribute to tumor initiation and growth (**Figure 1f**, and **S5**). Based on these two  
163 analyses, we selected 13 genes for further analysis (**Figure 1f**). The potential importance of  
164 these tumor suppressor genes was often supported by both sgRNAs targeting each gene,  
165 consistent with on-target effects. Finally, Lenti-sg*Pten*/*Cre* enrichment in tumors in *Nf1<sup>ff</sup>;TC*  
166 mice and Lenti-sg*Nf1*/*Cre* enrichment in tumors in *Pten<sup>ff</sup>;TC* mice cross-validate our screen  
167 (**Figure 1f** and **S4-5**).

168

### 169 **Inactivation of candidate tumor suppressors efficiently generates lung tumors**

170 To determine the potential of the top candidate tumor suppressor genes to initiate  
171 oncogene-negative tumors, we generated a pool of Lenti-sgRNA/*Cre* vectors targeting each of  
172 these tumor suppressor genes and one vector with an inert sgRNA (Lenti-sg*TS14*/*Cre* pool;  
173 **Figure 2a**). We targeted each gene with the sgRNA that had the most significant effect on tumor

174 growth and used five times higher titer of each lentiviral vector per mouse than we used in Lenti-  
175 sg*TS102/Cre* pool, thus increasing the potential for the transduction of the initial cell with  
176 multiple Lenti-sgRNA/*Cre* vectors.

177 We initiated tumors with Lenti-sg*TS14/Cre* in *Nf1<sup>ff</sup>;TC*, *Pten<sup>ff</sup>;TC*, *Trp53<sup>ff</sup>;TC*, *TC*, and  
178 *Kras<sup>LSL-G12D</sup>;T (KT)* mice. Less than four months after tumor initiation, several *Nf1<sup>ff</sup>;TC* and  
179 *Pten<sup>ff</sup>;TC* mice showed signs of extensive tumor burden. These mice developed many more  
180 tumors than mice of the same genotypes one year after transduction with the Lenti-sg*TS102/Cre*  
181 (compare **Figure 2b-c** with **Figure 1c-d**, and **S10c**). Thus, this pool of candidate tumor  
182 suppressor genes is enriched for those that generate oncogene-negative lung tumors.

183 We performed Tuba-seq on DNA from bulk tumor-bearing lungs to determine the  
184 number and size of tumors with each barcoded Lenti-sgRNA/*Cre* vector. Inactivation of *Nf1*,  
185 *Rasal*, and *Pten* most dramatically increased tumor size and/or tumor number across all mouse  
186 genotypes (**Figure 2d-e**, **S6a-b**, and **Methods**). Inactivation of some of the other tumor  
187 suppressor genes less dramatically but significantly increased tumor size and/or tumor number in  
188 a genotype-specific manner. This suggests that additional molecular pathways altered by these  
189 tumor suppressor genes may also lead to early epithelial expansions.

190 The largest tumors in *Nf1<sup>ff</sup>;TC*, *Pten<sup>ff</sup>;TC*, *Trp53<sup>ff</sup>;TC*, and *TC* mice were frequently  
191 generated through the inactivation of multiple tumor suppressor genes. Vectors targeting *Nf1*,  
192 *Rasal*, and/or *Pten* were often present in the largest tumors, and the coincident targeting of *Nf1*,  
193 *Rasal*, and *Pten* was the most frequent combination (**Figure 2f-g**, **S6c-h**). To gain greater insight  
194 into the contribution of *Nf1*, *Rasal*, and *Pten* inactivation to the generation of oncogene-negative  
195 tumors, we transduced *Nf1<sup>ff</sup>;TC*, *Pten<sup>ff</sup>;TC*, *Trp53<sup>ff</sup>;TC*, *TC*, and *KT* mice with a pool of Lenti-  
196 sgRNA/*Cre* vectors that lacked the vectors targeting *Nf1*, *Rasal*, and *Pten* (*Lenti-sgTS11/Cre*)

197 **(Figure S7a)**. Approximately four months after transduction, these mice had many fewer tumors  
198 than mice transduced with Lenti-*sgTS14/Cre* pool **(Figure S7b-c and S10c)**. Tuba-seq analysis  
199 confirmed a dramatic decrease in tumor burden relative to mice that received the Lenti-  
200 *sgTS14/Cre* pool **(Figure 2h)**. Thus, the inactivation of *Nfl*, *Rasa1*, and *Pten* emerged as the  
201 most important contributors to the generation of oncogene-negative lung tumors.

202 Extensive experiments generating single and pairwise inactivation of tumor suppressor  
203 genes in individual mice led to the development of very few tumors even after long periods of  
204 time **(Figure S8-S9)**. Thus, single and pairwise tumor suppressor gene inactivation is rarely  
205 sufficient to generate lung tumors and combinatorial inactivation of three or more tumor  
206 suppressor genes increases the efficiency of tumor development and/or accelerates the growth of  
207 oncogene-negative lung tumors.

208

### 209 **Combinatorial inactivation of *Nfl*, *Rasa1*, and *Pten* drives lung adenocarcinoma** 210 **development comparably to oncogenic *Kras* mutation**

211 To dissect the higher-order genetic interactions between *Nfl*, *Rasa1*, and *Pten*, we  
212 transduced *TC* and *Trp53<sup>ff</sup>;TC* mice with a pool of eight lentiviral vectors that would inactivate  
213 *Nfl*, *Rasa1*, and *Pten* individually, in pairwise combinations, and all three simultaneously (Lenti-  
214 *sgTS<sup>Triple-pool</sup>/Cre*, **Figure 3a**). Three months after tumor initiation, *TC* mice had hundreds of  
215 large adenomas and adenocarcinomas **(Figure 3b-c and Figure S10a-e)**. Tuba-seq analysis  
216 showed that most of the tumor burden arose as a consequence of concomitant inactivation of all  
217 three tumor suppressors, with single and pairwise inactivation of these genes generating very few  
218 tumors consistent with our previous observations **(Figure 3e and S8)**. Additional inactivation of  
219 *Trp53* in *Trp53<sup>ff</sup>;TC* mice did not increase tumor initiation suggesting that *Trp53* is not a major

220 suppressor of oncogene-negative lung adenocarcinoma development at these early stages  
221 (**Figure 3b-f** and **Figure S10a-h**). Finally, to compare the tumor initiation potential of  
222 combinatorial *Nf1*, *Rasa1*, and *Pten* inactivation with that of a known oncogene, we transduced  
223 *Kras<sup>LSL-G12D</sup>;T* mice (which lack Cas9) with Lenti-sgTS<sup>Triple-pool</sup>/Cre (**Figure 3a**). Strikingly,  
224 coincident inactivation of *Nf1*, *Rasa1*, and *Pten* in *TC* mice was nearly as potent as oncogenic  
225 KRAS<sup>G12D</sup> in driving lung tumor initiation *in vivo* (**Figure 3g** and **Methods**).

226 In molecular evolution studies, generating combinations of genomic alterations and  
227 measuring the fitness of each genotype (growth rate) is used to infer the possible and the most  
228 probable paths from a wild-type state to a complex genotype<sup>48</sup>. Through the generation of all  
229 possible combinatorial alterations of *Nf1*, *Rasa1*, and *Pten*, we quantified the fitness conferred by  
230 each mutation and the relative probabilities of different adaptive paths leading to the triple  
231 mutant genotype. Our data suggest that inactivation of these three genes can occur in any order,  
232 with each additional alteration further increasing the fitness (**Figure 3f**). The *Nf1*→*Rasa1*→*Pten*  
233 mutation sequence emerged as the most probable of all six possible paths.

234 To further analyze tumors driven by inactivation of *Nf1*, *Rasa1*, and *Pten*, we initiated  
235 tumors in *TC* and *Trp53<sup>ff</sup>;TC* mice using only the lentiviral vector that targets all three genes  
236 (Lenti-sg*Nf1*-sg*Rasa1*-sg*Pten*/Cre) (**Figure S11a**). After only three months, these mice  
237 developed very large numbers of lung adenomas and adenocarcinomas (**Figure S11b-e**). We  
238 confirmed the inactivation of *Nf1*, *Rasa1*, and *Pten* in these tumors and whole-exome sequencing  
239 uncovered no putative oncogene mutations and only a few putative tumor suppressor mutations,  
240 none of which occurred in more than one tumor (**Figure S11f** and **Table S3**). Interestingly, at  
241 later timepoints after initiation, tumors in *Trp53<sup>ff</sup>;TC* mice progressed to an invasive NKX2-

242 1<sup>negative</sup> HMGA2<sup>positive</sup> state and metastasized to other organs such as liver similar to what has  
243 been reported in *Kras*<sup>G12D</sup>; *Trp53* mutant lung adenocarcinoma models (**Figure S12**)<sup>49</sup>.

244

### 245 **Oncogene-negative murine lung adenocarcinomas have activated RAS and PI3K pathways**

246 NF1 and RASA1 are negative regulators of RAS, while PTEN is a negative regulator of  
247 the PI3K-AKT pathway. Therefore, we investigated the impact of inactivating these tumor  
248 suppressor genes on RAS and PI3K pathway activation by immunohistochemistry, as well as by  
249 RNA-sequencing (RNA-seq) on FACS-isolated Tomato<sup>positive</sup> cancer cells. We generated  
250 autochthonous tumors in which *Nf1*, *Rasa1*, and *Pten* were inactivated (*TC* mice with Lenti-  
251 *sgNf1-sgRasa1-sgPten/Cre*; Nf1/Rasa1/Pten tumors), KRAS<sup>G12D</sup> was expressed (*KT;H11<sup>LSL-Cas9</sup>*  
252 mice with Lenti-*sgInert/Cre*; *Kras* tumors), or KRAS<sup>G12D</sup> was expressed and *Pten* was  
253 inactivated (*KT;H11<sup>LSL-Cas9</sup>* mice with Lenti-*sgPten/Cre*; *Kras/Pten* tumors) (**Figure S13a**).

254 Nf1/Rasa1/Pten tumors had positive staining for pERK (indicative of RAS pathway activation)  
255 and pAKT (indicative of PI3K pathway activation) (**Figure 4a**). Compared with *Kras/Pten*  
256 tumors, the average pERK staining in Nf1/Rasa1/Pten tumors was less intense and pAKT  
257 staining was similar (**Figure 4b-c**). Single-sample gene set variation analysis (ssGSVA) for  
258 previously reported gene sets representing RAS and PI3K-AKT regulated genes<sup>50, 51</sup> on our  
259 RNA-seq data confirmed that Nf1/Rasa1/Pten tumors had lower RAS pathway gene signature  
260 scores than *Kras/Pten* tumors (**Figure S13b**). PI3K-AKT pathway gene signature scores were  
261 similar in Nf1/Rasa1/Pten and *Kras* tumors (**Figure S13c**). The rare tumors that eventually  
262 developed after pairwise inactivation of *Nf1*, *Rasa1*, and *Pten* also had strong activation of RAS  
263 and PI3K pathways (**Figure S8 and S13d**). Based on these analyses, we propose that these

264 tumors represent a subtype of oncogene-negative lung adenocarcinomas with activated RAS and  
265 PI3K pathways (Onc-negative<sup>RAS/PI3K</sup> subtype).

266

267 **Oncogene-negative human lung adenocarcinomas frequently have activation of RAS and**  
268 **PI3K pathways**

269 To investigate the activation of RAS and PI3K pathways in human oncogene-negative  
270 lung adenocarcinomas, we analyzed oncogene-negative (N=35) and oncogene-positive (N=18)  
271 lung adenocarcinomas. Immunohistochemistry for pERK and pAKT showed that ~45% of  
272 oncogene-negative human tumors had moderate to strong activation of both RAS and PI3K  
273 pathways and thus represent the Onco-negative<sup>RAS/PI3K</sup> subtype (**Figure 4d-h, S13e-j**). These  
274 tumors were genomically characterized by Stanford's Solid Tumor Actionable Mutation Panel  
275 (STAMP)<sup>52</sup>. Activation of the RAS and PI3K pathways were rarely explained by mutations in  
276 *NF1*, *PTEN*, or other genes profiled by STAMP (**Table S5 and S6**), likely due to the  
277 noncomprehensive tumor suppressor gene panel characterized by STAMP, as well as epigenetic  
278 mechanisms of RAS and PI3K pathway activation. Epigenetic silencing and other non-genomic  
279 mechanisms have been well documented to inhibit tumor suppressor genes including *PTEN*<sup>22, 23,</sup>  
280 <sup>53, 54</sup>. Therefore, we performed immunohistochemistry for PTEN on 20 oncogene-negative lung  
281 adenocarcinomas that did not have genomic *PTEN* mutations. Consistent with previous reports,  
282 we observed low PTEN protein levels in 13 out of 20 of these tumors (**Figure S14a-f**)<sup>22</sup>.

283 To assess a larger set of oncogene-negative lung adenocarcinomas for alterations that  
284 could lead to the activation of RAS and PI3K pathways, we analyzed oncogene-negative tumors  
285 in TCGA and GENIE datasets. We queried a set of well-established negative regulators of the  
286 RAS and PI3K pathways for alterations in oncogene-negative tumors (**Table S6**). Consistent



287 with previous reports, *NF1* and *RASA1* alterations were enriched in oncogene-negative tumors;  
288 however, coincident genomic alterations in *NF1*, *RASA1*, and *PTEN* were rare (**Figure S14g-h**)  
289 <sup>55, 56</sup>. However, over 60% of oncogene-negative lung adenocarcinomas in TCGA had alterations  
290 in either the RAS or PI3K pathways, and 22% of these tumors had alterations in components of  
291 both pathways, likely representing oncogene-negative<sup>RAS/PI3K</sup> lung adenocarcinomas (**Figure 4i**).  
292 These frequencies were lower in the GENIE dataset, possibly because only a fraction of the  
293 known genes in these pathways were analyzed (**Figure S14i**). These histological and genomic  
294 analyses support a model in which activation of the RAS and PI3K pathways in Onc-  
295 negative<sup>RAS/PI3K</sup> tumors can be generated by diverse genomic and/or epigenetic alterations.

296 Finally, we assessed whether Onc-negative<sup>RAS/PI3K</sup> tumors in our mouse model more  
297 broadly exhibit transcriptional features that are consistent oncogene-negative human lung  
298 adenocarcinoma. We generated a gene expression signature of murine Onc-negative<sup>RAS/PI3K</sup>  
299 tumors comprised of genes that are higher in *Nf1/Rasa1/Pten* tumors relative to *Kras* tumors in  
300 mice. We then calculated gene signature activity scores for each TCGA lung adenocarcinoma for  
301 this Onc-negative<sup>RAS/PI3K</sup> gene expression signature using single-sample GSEA (**Table S4**).  
302 Interestingly, the Onc-negative<sup>RAS/PI3K</sup> signature was highest in oncogene-negative human lung  
303 adenocarcinomas relative to lung adenocarcinomas driven by oncogenic *KRAS* or other known  
304 oncogenes (**Figure 4j**). Collectively, these data indicate that the molecular and biochemical state  
305 of mouse Onc-negative<sup>RAS/PI3K</sup> tumors recapitulates that of a substantial fraction of oncogene-  
306 negative human lung adenocarcinomas.

307

308 **Onc-negative<sup>RAS/PI3K</sup> tumors are vulnerable to inhibition of RAS and PI3K-AKT pathways**

309           Understanding the biochemical changes that drive tumor development can nominate  
310 potential therapeutic strategies<sup>38</sup>. To investigate the therapeutic benefit of targeting key nodes in  
311 Onc-negative<sup>RAS/PI3K</sup> lung cancer, we initiated tumors in *TC* mice with a smaller pool of  
312 barcoded sgRNA viral vectors targeting *Nf1*, *Rasa1*, and *Pten*. We treated these mice with the  
313 SHP2 inhibitor RMC-4550<sup>57</sup>, AKT1/2 inhibitor capivasertib<sup>58,59</sup>, or a combination of the two  
314 (**Figure 5a** and **S15a-b**). These drugs were chosen based on their ongoing clinical development  
315 and ability to reduce activation RAS and PI3K pathways<sup>57,59</sup>.

316           Direct fluorescence imaging and histology indicated that SHP2 inhibition and combined  
317 SHP2 and AKT1/2 inhibition greatly reduced tumor burden (**Figure 5b-c** and **S15c**). Tuba-seq  
318 analysis provided greater insights into the overall and genotype-specific responses of tumors to  
319 the therapeutic interventions. Capivasertib monotherapy was ineffective *in vivo* while RMC-  
320 4550 reduced the total tumor burden. The combination of RMC-4550 and capivasertib trended  
321 towards being the most efficient therapeutic approach reducing tumor burden by ~30% compared  
322 with RMC-4550 alone (**Figure 5d**, **S15d-g**).

323           We confirmed the inhibition of RAS and PI3K pathways in oncogene-negative<sup>RAS/PI3K</sup>  
324 tumors in mice treated with RMC-4550 and capivasertib by immunohistochemistry (**Figure**  
325 **S15h**). Furthermore, global gene expression analysis confirmed the downregulation of RAS and  
326 PI3K-AKT gene expression signatures after coincident SHP2 and AKT1/2 inhibition (**Figure**  
327 **S16a-d**). Treated tumors tended to have higher expression of an apoptosis gene expression  
328 signature and lower expression of a G2/M gene expression signature, suggesting that this  
329 combination treatment induces broad cellular changes in oncogene-negative tumors (**Figure**  
330 **S16e-f**).

331

332 **Inhibition of SHP2 and AKT synergizes to reduce the growth of Onc-negative<sup>RAS/PI3K</sup> lung**  
333 **adenocarcinoma cell lines**

334 To more extensively characterize the responses to SHP2 and AKT inhibition, we  
335 generated *Nf1/Rasa1/Pten* deficient Onc-negative<sup>RAS/PI3K</sup> cell lines from tumors initiated with  
336 Lenti-*sgNf1-sgRasa1-sgPten/Cre* in *Trp53<sup>fllox/fllox</sup>;TC* mice (**S17a-c**). As anticipated, RAS and  
337 PI3K signaling was reduced in response to treatment with RMC-4550 and capivasertib,  
338 respectively (**Figure S17d**). RMC-4550 and capivasertib each decreased the overall growth of  
339 three oncogene-negative<sup>RAS/PI3K</sup> cell lines in a dose-dependent manner (**Figure 6a** and **S17e, g**).  
340 Consistent with our *in vivo* observations, RMC-4550 and capivasertib synergized to inhibit the  
341 growth of these cell lines (**Figure 6b**, and **S17f, h**). RAS and PI3K signaling can promote cell  
342 growth and survival [58, 59], and RMC-4550 and capivasertib inhibited proliferation and  
343 induced apoptosis to a greater extent than either RMC-4550 or capivasertib alone (**Figure 6c-d**).

344 Building on these findings, we assessed activation of RAS and PI3K pathways and driver  
345 pathway vulnerabilities in two oncogene-negative human lung adenocarcinoma cell lines, NCI-  
346 H1838 (*NF1<sup>LOF</sup>*) and NCI-H1623 (*RASA1<sup>LOF</sup>*). H1838 and H1623 had activation of RAS and  
347 PI3K pathways (**Figure S17i**). Consistent with our findings in mouse Onc-negative<sup>RAS/PI3K</sup> cell  
348 lines, RMC-4550 synergizes with capivasertib to inhibit the growth of these human Onc-  
349 negative<sup>RAS/PI3K</sup> lung adenocarcinoma cell lines (**Figure 6e-f** and **S17j-k**). These *in vivo* and cell  
350 culture analyses indicate that Onc-negative<sup>RAS/PI3K</sup> tumors are vulnerable to therapeutic inhibition  
351 of these pathways.

352

353 **DISCUSSION**

354 It is often overlooked that lung adenocarcinomas without genomic alterations in  
355 oncogenes afflict as many patients as those driven by either oncogenic KRAS or EGFR. To  
356 identify whether combinatorial inactivation of multiple tumor suppressor genes drives the  
357 initiation and growth of lung adenocarcinoma in the absence of oncogene activation, we  
358 performed a series of multiplexed *in vivo* functional genomic screens. By querying an extensive  
359 set of tumor suppressor gene alterations, we uncovered combinatorial tumor suppressor  
360 inactivation as a key driver of oncogene-negative lung adenocarcinomas. Importantly,  
361 combinatorial inactivation of negative regulators of RAS and PI3K pathways are as potent as  
362 oncogenic KRAS<sup>G12D</sup> in initiating lung tumors *in vivo*.

363 Furthermore, while *NFI* inactivation is sometimes suggested to be an “oncogenic driver”  
364 in lung adenocarcinoma<sup>4, 29, 60</sup>, *Nfi* inactivation alone is insufficient to initiate lung tumors  
365 (**Figure S8**). Even pairwise inactivation of *Nfi* and *Rasa1*, as well as many other tumor  
366 suppressor genes, generated very few tumors even after long time periods (**Figure S8**). These  
367 data suggest that genomic and/or epigenetic alterations in multiple genes within and across  
368 pathways may be required to surpass the thresholds necessary for Onc-negative<sup>RAS/PI3K</sup> lung  
369 adenocarcinoma initiation and growth.

370 Although cancers harbor diverse genomic and epigenomic alterations, these alterations  
371 often converge on key pathways and generate similar biochemical changes<sup>15, 61</sup>. For example,  
372 myeloid leukemia can be driven by gain-of-function mutations in *KRAS*, *NRAS*, or the receptor  
373 tyrosine kinase *FLT3*, or combined inactivation of multiple negative regulators of RAS pathway  
374 such as *SPRY4* and *NFI*<sup>62, 63</sup>. Pathway activation through genomic and epigenomic inactivation  
375 of tumor suppressors can be very diverse, precluding the identification of non-oncogene drivers  
376 from gene-centric analysis of human cancer genomic data. Notably, our pathway analysis in

377 oncogene-negative lung adenocarcinomas indicated that mutations in different genes that  
378 converge on the RAS and PI3K pathways frequently co-occur (**Figure 4i** and **S14i**).  
379 Furthermore, previous reports and our observations suggest frequent non-genomic mechanisms  
380 of downregulation of RAS GAPs and PTEN (**Figure 4f-h, S14a-f**)<sup>4, 22-24, 53, 54</sup>. Thus, genomic  
381 alterations should be viewed as a floor, not a ceiling, in estimating the frequency of pathway  
382 alteration.

383 We assessed the ability of hundreds of complex tumor suppressor genotypes to generate  
384 lung tumors. While activation of RAS and PI3K pathway emerged as the most potent driver of  
385 oncogene-negative lung adenocarcinomas, our data also suggest that combinatorial inactivation  
386 of tumor suppressor genes outside these two pathways can likely initiate tumorigenesis (**Figure 2**  
387 and **S6**). Given the mutational diversity and complexity of oncogene-negative human lung  
388 adenocarcinomas<sup>64</sup>, there remain many other mutational combinations to be investigated. We  
389 anticipate that additional studies will uncover other oncogene negative tumor subtypes beyond  
390 Onc-negative<sup>RAS/PI3K</sup> lung adenocarcinomas.

391 Knowledge of the genes underlying human cancer is a pillar of cancer diagnostics,  
392 personalized medicine, and the selection of rational combination therapies. Additionally, our data  
393 demonstrate RAS and PI3K pathway activation in the absence of oncogene mutations in a sizable  
394 fraction of human lung adenocarcinoma that could predict therapeutic vulnerability to SHP2 and  
395 AKT inhibitors. Thus, biochemical assessment of oncogenic pathways in tumors is a strong  
396 foundation for rational selection of therapies and clinical trial designs. Beyond SHP2 and AKT,  
397 extensive efforts have generated inhibitors for many other components of the RAS and PI3K  
398 pathways. Thus, further investigation of the therapeutic targeting of key nodes within the RAS

399 pathway (*e.g.*, SOS, MEK, ERK) and PI3K pathway (*e.g.*, PI3K, mTOR), could contribute to the  
400 development of the most effective therapies for Onc-negative<sup>RAS/PI3K</sup> lung adenocarcinomas.

401 Our findings uncover tumorigenic mechanisms and clinical features of oncogene-  
402 negative lung adenocarcinomas. This work identifies biomarkers and new therapeutic targets for  
403 Onc-negative<sup>RAS/PI3K</sup> tumors. The generation of comprehensive molecular and pharmacogenomic  
404 maps of oncogene-negative lung adenocarcinomas will transform our understanding of these  
405 heretofore poorly characterized lung cancer subtypes.

406

#### 407 **ACKNOWLEDGEMENTS**

408 We thank the Stanford Shared FACS Facility for flow cytometry and cell sorting  
409 services, the Stanford Veterinary Animal Care Staff for expert animal care, Human  
410 Pathology/Histology Service Center, Stanford Protein and Nucleic Acid Facility; A. Orantes and  
411 S. Mello for administrative support; Stanford's Molecular Genetic Pathology Laboratory and  
412 Henning Stehr for their help in providing genetically profiled tumor tissues. David Feldser,  
413 Joseph Lipsick, Eric Collisson, Christopher McFarland, and members of the Winslow and Petrov  
414 laboratories for helpful discussions and reviewing the manuscript. We thank Florent Elefteriou  
415 and Alejandro Sweet-Cordero for providing mouse strains. M.Y. was supported by a Stanford  
416 University School of Medicine Dean's fellowship, an American Lung Association senior  
417 research training grant, and an NIH Ruth L. Kirschstein National Research Service Award (F32-  
418 CA236311). G.B., H.C., and J.D.H. were supported by a Tobacco-Related Disease Research  
419 Program (TRDRP) Postdoctoral Fellowships (T31FT-1772, 28FT-0019, and T31FT-1619).  
420 C.W.M. was supported by the NSF Graduate Research Fellowship Program and an Anne T. and  
421 Robert M. Bass Stanford Graduate Fellowship. W-Y.L. was supported by an American

422 Association of Cancer Research Postdoctoral fellowship (17-40-18-LIN). C.L. was the Connie  
423 and Bob Lurie Fellow of the Damon Runyon Cancer Research Foundation (DRG-2331). E.L.A  
424 and C.I.C were supported by PHS Grant Number CA09302, awarded by the National Cancer  
425 Institute, DHHS. E.L.A. was also supported by HHMI Gilliam Fellowship for Advanced Study  
426 (GT14928). This work was supported by NIH R01-CA231253 (to M.M.W and D.A.P), NIH  
427 R01-CA230919 (to M.M.W.) and NIH R01-CA234349 (to M.M.W and D.A.P.), as well as by  
428 the Stanford Cancer Institute, an NCI-designated Comprehensive Cancer Center.

429

#### 430 **CONFLICT OF INTERESTS**

431 S.K.C. receives grant support from Ono Pharma. C.S. acknowledges grant support from Pfizer,  
432 AstraZeneca, Bristol Myers Squibb, Roche-Ventana, Boehringer-Ingelheim, Archer Dx, and Ono  
433 Pharmaceuticals. C.S is an AstraZeneca Advisory Board member and Chief Investigator for the  
434 MeRmaid1 clinical trial, has consulted for Pfizer, Novartis, GlaxoSmithKline, MSD, Bristol  
435 Myers Squibb, Celgene, AstraZeneca, Illumina, Amgen, Genentech, Roche-Ventana, GRAIL,  
436 Medicxi, Bicycle Therapeutics, and the Sarah Cannon Research Institute, has stock options in  
437 Apogen Biotechnologies, Epic Bioscience, GRAIL, and has stock options and is co-founder of  
438 Achilles Therapeutics. D.A.P. and M.M.W. are founders of, and hold equity in, D2G Oncology  
439 Inc.

440

#### 441 **REFERENCES**

- 442 1. Barta, J.A., Powell, C.A. & Wisnivesky, J.P. Global Epidemiology of Lung Cancer. *Ann*  
443 *Glob Health* **85** (2019).
- 444 2. Devarakonda, S., Morgensztern, D. & Govindan, R. Genomic alterations in lung  
445 adenocarcinoma. *Lancet Oncol* **16**, e342-351 (2015).
- 446 3. McDermott, U., Downing, J.R. & Stratton, M.R. Genomics and the continuum of cancer  
447 care. *N Engl J Med* **364**, 340-350 (2011).



- 448 4. Cancer Genome Atlas Research, N. Comprehensive molecular profiling of lung  
449 adenocarcinoma. *Nature* **511**, 543-550 (2014).
- 450 5. Carrot-Zhang, J. *et al.* Whole-genome characterization of lung adenocarcinomas lacking  
451 the RTK/RAS/RAF pathway. *Cell Rep* **34**, 108707 (2021).
- 452 6. Campbell, J.D. *et al.* Distinct patterns of somatic genome alterations in lung  
453 adenocarcinomas and squamous cell carcinomas. *Nat Genet* **48**, 607-616 (2016).
- 454 7. Lawrence, M.S. *et al.* Discovery and saturation analysis of cancer genes across 21 tumour  
455 types. *Nature* **505**, 495-501 (2014).
- 456 8. Vaishnavi, A. *et al.* Oncogenic and drug-sensitive NTRK1 rearrangements in lung  
457 cancer. *Nat Med* **19**, 1469-1472 (2013).
- 458 9. Jonna, S. *et al.* Detection of NRG1 Gene Fusions in Solid Tumors. *Clin Cancer Res* **25**,  
459 4966-4972 (2019).
- 460 10. Soda, M. *et al.* Identification of the transforming EML4-ALK fusion gene in non-small-  
461 cell lung cancer. *Nature* **448**, 561-566 (2007).
- 462 11. Takeuchi, K. *et al.* RET, ROS1 and ALK fusions in lung cancer. *Nat Med* **18**, 378-381  
463 (2012).
- 464 12. Izumi, H. *et al.* The CLIP1-LTK fusion is an oncogenic driver in non-small-cell lung  
465 cancer. *Nature* (2021).
- 466 13. Vogelstein, B. *et al.* Cancer genome landscapes. *Science* **339**, 1546-1558 (2013).
- 467 14. Yaffe, M.B. The scientific drunk and the lamppost: massive sequencing efforts in cancer  
468 discovery and treatment. *Sci Signal* **6**, pe13 (2013).
- 469 15. Sanchez-Vega, F. *et al.* Oncogenic Signaling Pathways in The Cancer Genome Atlas.  
470 *Cell* **173**, 321-337 e310 (2018).
- 471 16. Krogan, N.J., Lippman, S., Agard, D.A., Ashworth, A. & Ideker, T. The cancer cell map  
472 initiative: defining the hallmark networks of cancer. *Mol Cell* **58**, 690-698 (2015).
- 473 17. George, J. *et al.* Comprehensive genomic profiles of small cell lung cancer. *Nature* **524**,  
474 47-53 (2015).
- 475 18. Gouyer, V. *et al.* Mechanism of retinoblastoma gene inactivation in the spectrum of  
476 neuroendocrine lung tumors. *Am J Respir Cell Mol Biol* **18**, 188-196 (1998).
- 477 19. Sekido, Y., Fong, K.M. & Minna, J.D. Molecular genetics of lung cancer. *Annu Rev Med*  
478 **54**, 73-87 (2003).
- 479 20. Meuwissen, R. *et al.* Induction of small cell lung cancer by somatic inactivation of both  
480 Trp53 and Rb1 in a conditional mouse model. *Cancer Cell* **4**, 181-189 (2003).
- 481 21. Govindan, R. *et al.* Genomic landscape of non-small cell lung cancer in smokers and  
482 never-smokers. *Cell* **150**, 1121-1134 (2012).
- 483 22. Soria, J.C. *et al.* Lack of PTEN expression in non-small cell lung cancer could be related  
484 to promoter methylation. *Clin Cancer Res* **8**, 1178-1184 (2002).
- 485 23. Kazanets, A., Shorstova, T., Hilmi, K., Marques, M. & Witcher, M. Epigenetic silencing  
486 of tumor suppressor genes: Paradigms, puzzles, and potential. *Biochim Biophys Acta*  
487 **1865**, 275-288 (2016).
- 488 24. Ding, L. *et al.* Somatic mutations affect key pathways in lung adenocarcinoma. *Nature*  
489 **455**, 1069-1075 (2008).
- 490 25. Lee, J.S., Grisham, J.W. & Thorgeirsson, S.S. Comparative functional genomics for  
491 identifying models of human cancer. *Carcinogenesis* **26**, 1013-1020 (2005).
- 492 26. Hutter, C. & Zenklusen, J.C. The Cancer Genome Atlas: Creating Lasting Value beyond  
493 Its Data. *Cell* **173**, 283-285 (2018).



- 494 27. Consortium, A.P.G. AACR Project GENIE: Powering Precision Medicine through an  
495 International Consortium. *Cancer Discov* **7**, 818-831 (2017).
- 496 28. Jorge, S.E., Kobayashi, S.S. & Costa, D.B. Epidermal growth factor receptor (EGFR)  
497 mutations in lung cancer: preclinical and clinical data. *Braz J Med Biol Res* **47**, 929-939  
498 (2014).
- 499 29. Skoulidis, F. & Heymach, J.V. Co-occurring genomic alterations in non-small-cell lung  
500 cancer biology and therapy. *Nat Rev Cancer* **19**, 495-509 (2019).
- 501 30. Saito, M. *et al.* Gene aberrations for precision medicine against lung adenocarcinoma.  
502 *Cancer Sci* **107**, 713-720 (2016).
- 503 31. Rogers, Z.N. *et al.* A quantitative and multiplexed approach to uncover the fitness  
504 landscape of tumor suppression in vivo. *Nat Methods* **14**, 737-742 (2017).
- 505 32. Rogers, Z.N. *et al.* Mapping the in vivo fitness landscape of lung adenocarcinoma tumor  
506 suppression in mice. *Nat Genet* **50**, 483-486 (2018).
- 507 33. Winters, I.P. *et al.* Multiplexed in vivo homology-directed repair and tumor barcoding  
508 enables parallel quantification of Kras variant oncogenicity. *Nat Commun* **8**, 2053 (2017).
- 509 34. Winters, I.P., Murray, C.W. & Winslow, M.M. Towards quantitative and multiplexed in  
510 vivo functional cancer genomics. *Nat Rev Genet* **19**, 741-755 (2018).
- 511 35. Cai, H., *et al.* A functional taxonomy of tumor suppression in oncogenic KRAS-driven  
512 lung cancer. *Under consideration* (2021).
- 513 36. Madisen, L. *et al.* A robust and high-throughput Cre reporting and characterization  
514 system for the whole mouse brain. *Nat Neurosci* **13**, 133-140 (2010).
- 515 37. Chiou, S.H. *et al.* Pancreatic cancer modeling using retrograde viral vector delivery and  
516 in vivo CRISPR/Cas9-mediated somatic genome editing. *Genes Dev* **29**, 1576-1585  
517 (2015).
- 518 38. Lynch, T.J. *et al.* Activating mutations in the epidermal growth factor receptor underlying  
519 responsiveness of non-small-cell lung cancer to gefitinib. *N Engl J Med* **350**, 2129-2139  
520 (2004).
- 521 39. Ohashi, K. *et al.* Characteristics of lung cancers harboring NRAS mutations. *Clin Cancer*  
522 *Res* **19**, 2584-2591 (2013).
- 523 40. Lin, Q. *et al.* The association between BRAF mutation class and clinical features in  
524 BRAF-mutant Chinese non-small cell lung cancer patients. *J Transl Med* **17**, 298 (2019).
- 525 41. Jackson, E.L. *et al.* Analysis of lung tumor initiation and progression using conditional  
526 expression of oncogenic K-ras. *Genes Dev* **15**, 3243-3248 (2001).
- 527 42. Paez, J.G. *et al.* EGFR mutations in lung cancer: correlation with clinical response to  
528 gefitinib therapy. *Science* **304**, 1497-1500 (2004).
- 529 43. Politi, K. *et al.* Lung adenocarcinomas induced in mice by mutant EGF receptors found  
530 in human lung cancers respond to a tyrosine kinase inhibitor or to down-regulation of the  
531 receptors. *Genes Dev* **20**, 1496-1510 (2006).
- 532 44. Li, D. *et al.* Bronchial and peripheral murine lung carcinomas induced by T790M-L858R  
533 mutant EGFR respond to HKI-272 and rapamycin combination therapy. *Cancer Cell* **12**,  
534 81-93 (2007).
- 535 45. van Veen, J.E. *et al.* Mutationally-activated PI3'-kinase-alpha promotes de-differentiation  
536 of lung tumors initiated by the BRAF(V600E) oncoprotein kinase. *Elife* **8** (2019).
- 537 46. Dankort, D. *et al.* A new mouse model to explore the initiation, progression, and therapy  
538 of BRAFV600E-induced lung tumors. *Genes Dev* **21**, 379-384 (2007).

- 539 47. McFadden, D.G. *et al.* Mutational landscape of EGFR-, MYC-, and Kras-driven  
540 genetically engineered mouse models of lung adenocarcinoma. *Proc Natl Acad Sci U S A*  
541 **113**, E6409-E6417 (2016).
- 542 48. Weinreich, D.M., Delaney, N.F., Depristo, M.A. & Hartl, D.L. Darwinian evolution can  
543 follow only very few mutational paths to fitter proteins. *Science* **312**, 111-114 (2006).
- 544 49. Winslow, M.M. *et al.* Suppression of lung adenocarcinoma progression by Nkx2-1.  
545 *Nature* **473**, 101-104 (2011).
- 546 50. Sweet-Cordero, A. *et al.* An oncogenic KRAS2 expression signature identified by cross-  
547 species gene-expression analysis. *Nat Genet* **37**, 48-55 (2005).
- 548 51. Agarwal, A. *et al.* The AKT/I kappa B kinase pathway promotes angiogenic/metastatic  
549 gene expression in colorectal cancer by activating nuclear factor-kappa B and beta-  
550 catenin. *Oncogene* **24**, 1021-1031 (2005).
- 551 52. Yang, S.R. *et al.* Comprehensive Genomic Profiling of Malignant Effusions in Patients  
552 with Metastatic Lung Adenocarcinoma. *J Mol Diagn* **20**, 184-194 (2018).
- 553 53. Maertens, O. & Cichowski, K. An expanding role for RAS GTPase activating proteins  
554 (RAS GAPs) in cancer. *Adv Biol Regul* **55**, 1-14 (2014).
- 555 54. Song, M.S., Salmena, L. & Pandolfi, P.P. The functions and regulation of the PTEN  
556 tumour suppressor. *Nat Rev Mol Cell Biol* **13**, 283-296 (2012).
- 557 55. Hayashi, T. *et al.* RASA1 and NF1 are Preferentially Co-Mutated and Define A Distinct  
558 Genetic Subset of Smoking-Associated Non-Small Cell Lung Carcinomas Sensitive to  
559 MEK Inhibition. *Clin Cancer Res* **24**, 1436-1447 (2018).
- 560 56. Kitajima, S. & Barbie, D.A. RASA1/NF1-Mutant Lung Cancer: Racing to the Clinic?  
561 *Clin Cancer Res* **24**, 1243-1245 (2018).
- 562 57. Nichols, R.J. *et al.* RAS nucleotide cycling underlies the SHP2 phosphatase dependence  
563 of mutant BRAF-, NF1- and RAS-driven cancers. *Nat Cell Biol* **20**, 1064-1073 (2018).
- 564 58. Middleton, G. *et al.* The National Lung Matrix Trial of personalized therapy in lung  
565 cancer. *Nature* **583**, 807-812 (2020).
- 566 59. Davies, B.R. *et al.* Preclinical pharmacology of AZD5363, an inhibitor of AKT:  
567 pharmacodynamics, antitumor activity, and correlation of monotherapy activity with  
568 genetic background. *Mol Cancer Ther* **11**, 873-887 (2012).
- 569 60. O'Neill, A.C., Jagannathan, J.P. & Ramaiya, N.H. Evolving Cancer Classification in the  
570 Era of Personalized Medicine: A Primer for Radiologists. *Korean J Radiol* **18**, 6-17  
571 (2017).
- 572 61. Hanahan, D. & Weinberg, R.A. Hallmarks of cancer: the next generation. *Cell* **144**, 646-  
573 674 (2011).
- 574 62. Zhao, Z. *et al.* Cooperative loss of RAS feedback regulation drives myeloid  
575 leukemogenesis. *Nat Genet* **47**, 539-543 (2015).
- 576 63. Lock, R. & Cichowski, K. Loss of negative regulators amplifies RAS signaling. *Nat*  
577 *Genet* **47**, 426-427 (2015).
- 578 64. Lawrence, M.S. *et al.* Mutational heterogeneity in cancer and the search for new cancer-  
579 associated genes. *Nature* **499**, 214-218 (2013).
- 580

Yousefi, Boross *et al.*

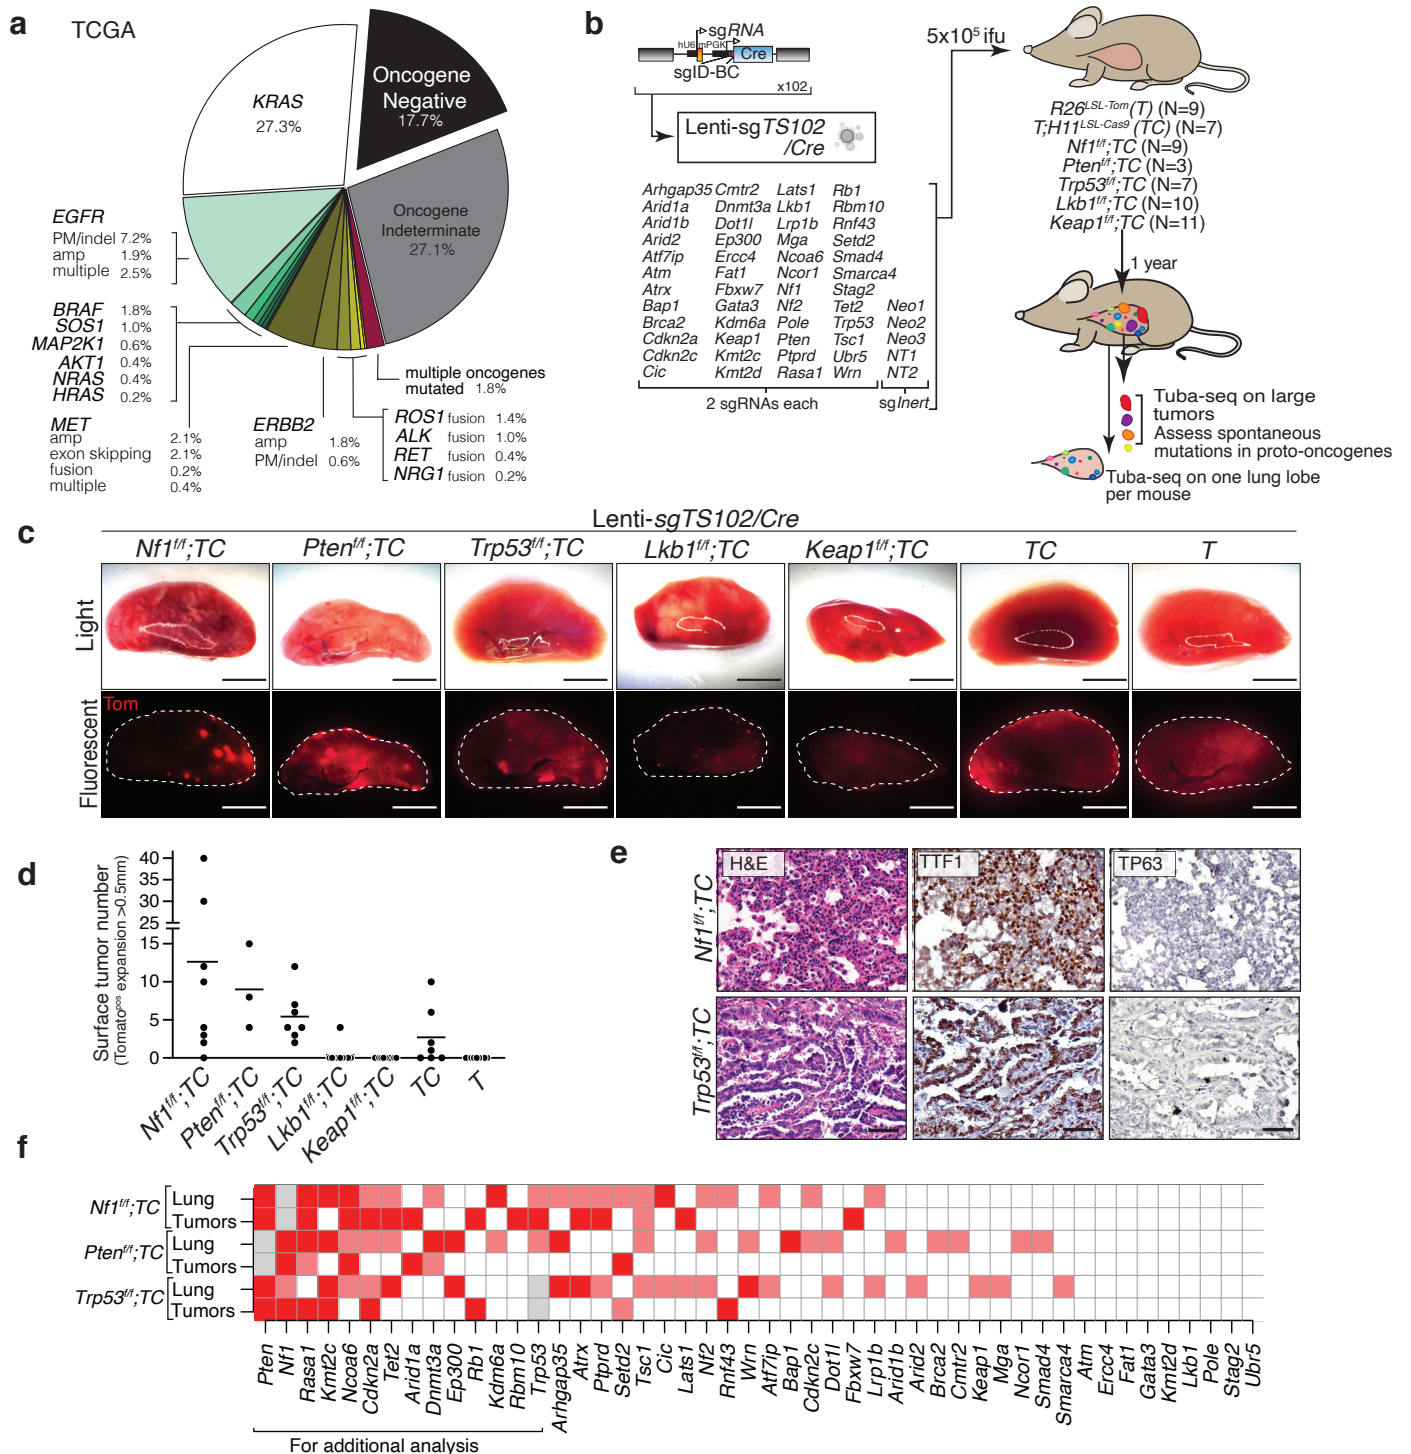

**Figure 1. Combinatorial tumor suppressor inactivation enables lung tumor development in the absence of engineered oncogenes.**

**a.** Frequency of human lung adenocarcinomas with likely oncogenic alterations in proto-oncogenes (oncogene-positive), with alterations of unknown effects in proto-oncogenes (oncogene-indeterminate), and without any alterations in proto-oncogenes (oncogene-negative). Data from TCGA. PM: point mutation, indel: insertion and deletion, amp: amplification, multiple: multiple alterations in the same gene.

**b.** Combined Cre/lox and CRISPR/Cas9-mediated tumor suppressor gene inactivation to generate lung epithelial cells with diverse genotypes. The number of mice in each group is indicated.

**c.** Representative light and fluorescence images of lung lobes from the indicated genotypes of mice one year after transduction with the Lenti-sgTS102/Cre pool. Lung lobes are outlined with white dotted lines. Scale bar = 4 mm

**d.** The number of surface tumors (defined as Tomato-positive expansions greater than 0.5 mm in diameter) quantified by direct counting. Each dot represents a mouse, and the bar is the mean.

**e.** Representative Hematoxylin and Eosin (H&E), TTF1, and TP63 stained sections of the indicated genotypes of mice. Scale bar = 100  $\mu$ m

**f.** Heatmap showing two measures of tumor suppressor strengths in each genotype detected using Tuba-seq analysis: (1) in rows labeled as "Tumors" we assessed the occurrence of tumor suppressor gene targeting vectors in dissected tumors.  $p < 0.001$  (red),  $p < 0.1$  (pink) (see **Figure S4**) (2) In rows labeled as "Lung" we measured increases in median sizes of clonal expansions in the presence of indicated tumor suppressor alterations in bulk single lung lobe samples. Gene mutations showing significant increases ( $p < 0.05$ ) in sizes of clonal expansions using all sgRNAs are shown in red, and those with only one significant sgRNA are shown in pink (see **Figure S5**). Gray boxes indicate redundant targeting of genes by both Cre/loxP and CRISPR/Cas9.

Yousefi, Boross *et al.*

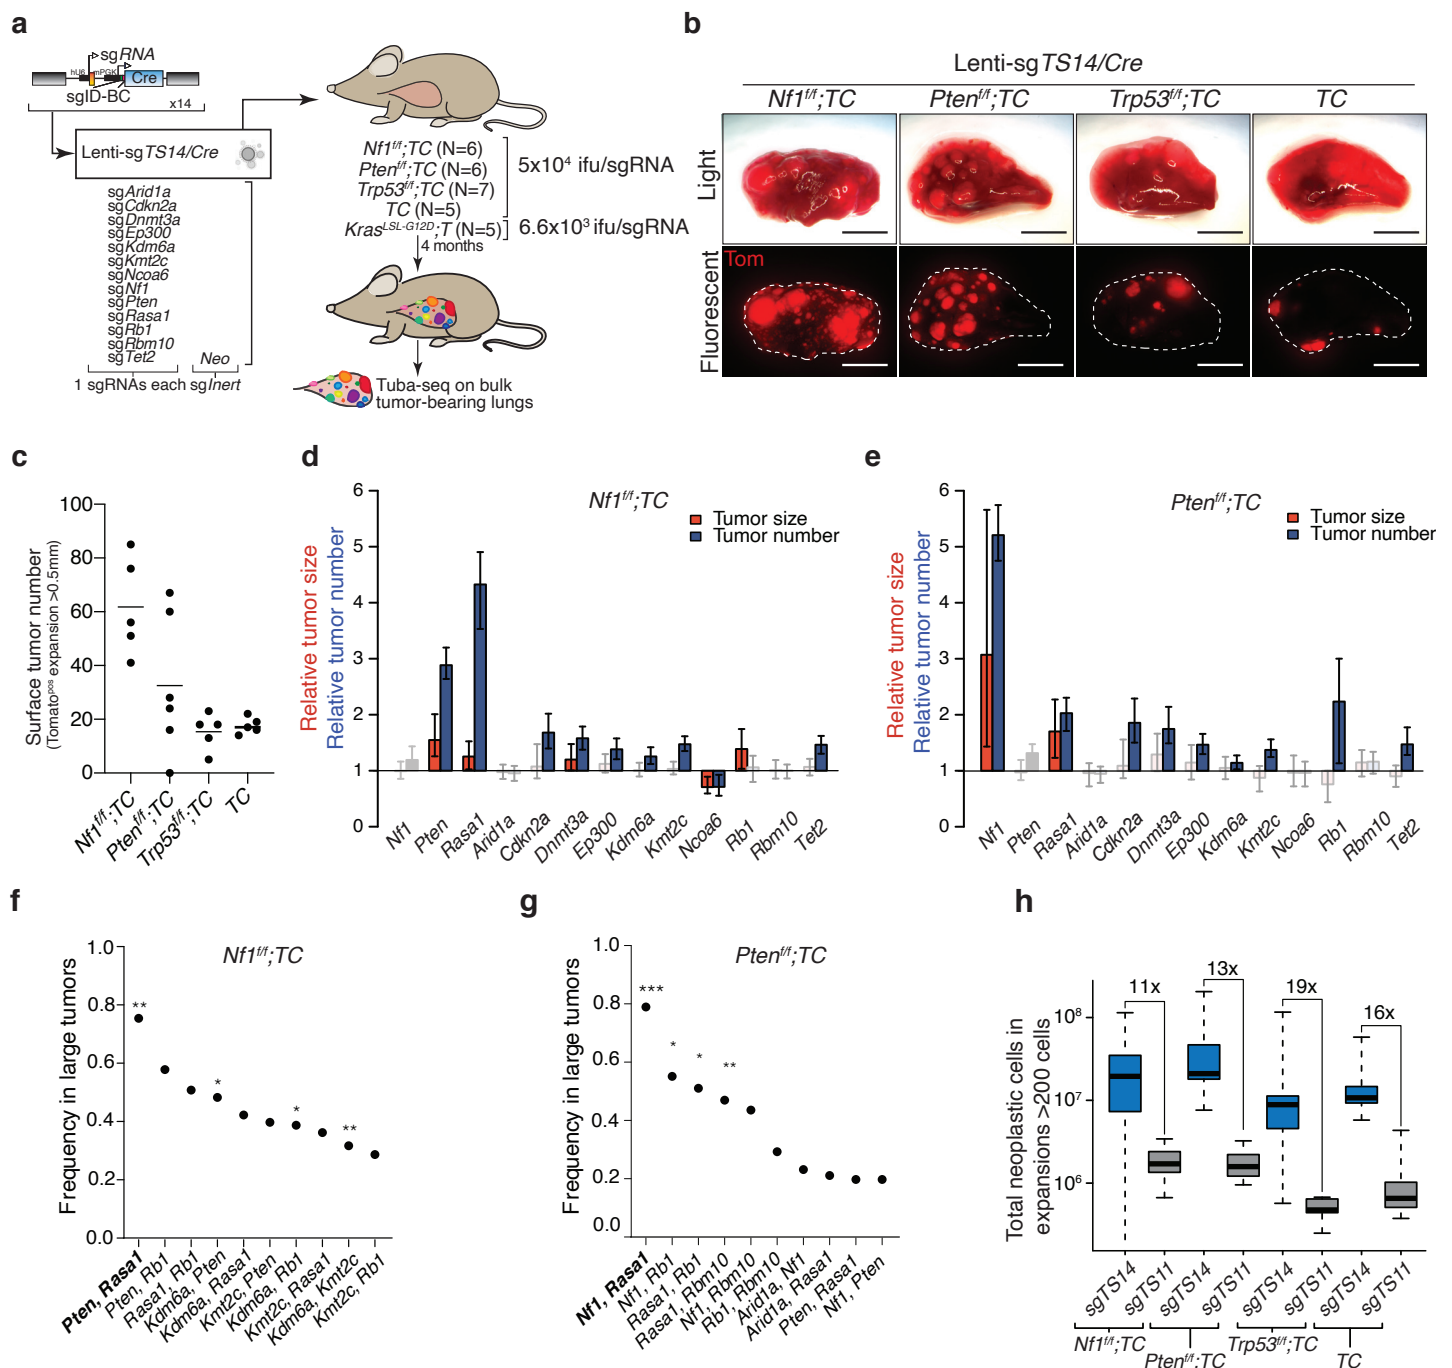

**Figure 2. *Nf1*, *Rasa1*, and *Pten* emerge as key drivers of oncogene-negative lung adenocarcinoma.**

**a.** Combined Cre/lox and CRISPR/Cas9-mediated tumor suppressor gene inactivation to generate lung epithelial cells with diverse genotypes. The number of mice in each group is indicated.

**b.** Representative light and fluorescence images of lung lobes from the indicated genotypes of mice. Lung lobes are outlined with white dotted lines. Scale bar = 4mm

**c.** The number of tumors (defined as Tomato-positive expansions larger than 0.5 mm in diameter) quantified by direct counting. Each dot represents a mouse, and the bar is the mean.

**d,e.** The number of tumors with a minimum size of 1000 neoplastic cells relative to the inert sgRNA containing expansions is shown as blue bars. 90<sup>th</sup> percentile of tumor sizes relative to the inert sgRNAs is shown as a red bar. sgRNAs resulting in significantly different tumor number or size ( $p < 0.05$ ) are shown in darker colors. Whiskers show 95% confidence intervals. Mouse genotypes are indicated.

**f,g.** Barcodes with the highest counts in each mouse were investigated for coinfection with multiple Lenti-sgTS/Cre vectors (i.e., tumors initiated from cells transduced with multiple viruses, which result in complex tumor suppressor genotypes, see **Methods**). The top 10 pairs of tumor suppressors that were most frequently co-mutated are shown. Combinations of sgRNAs that lead to the generation of *Nf1*, *Rasa1*, and *Pten* mutant cancer cells are in bold. \* $p < 0.05$ , \*\* $p < 0.01$ , \*\*\* $p < 0.001$  based on a permutation test.

**h.** Total number of neoplastic cells in clonal expansions with more than 200 cells in the indicated genotypes of mice after receiving Lenti-sgTS14/Cre or Lenti-sgTS11/Cre, which lacks lentiviral vectors containing sg*Nf1*, sg*Rasa1*, and sg*Pten*. The magnitude of neoplastic cell number reduction in each group is indicated.



Yousefi, Boross et al.

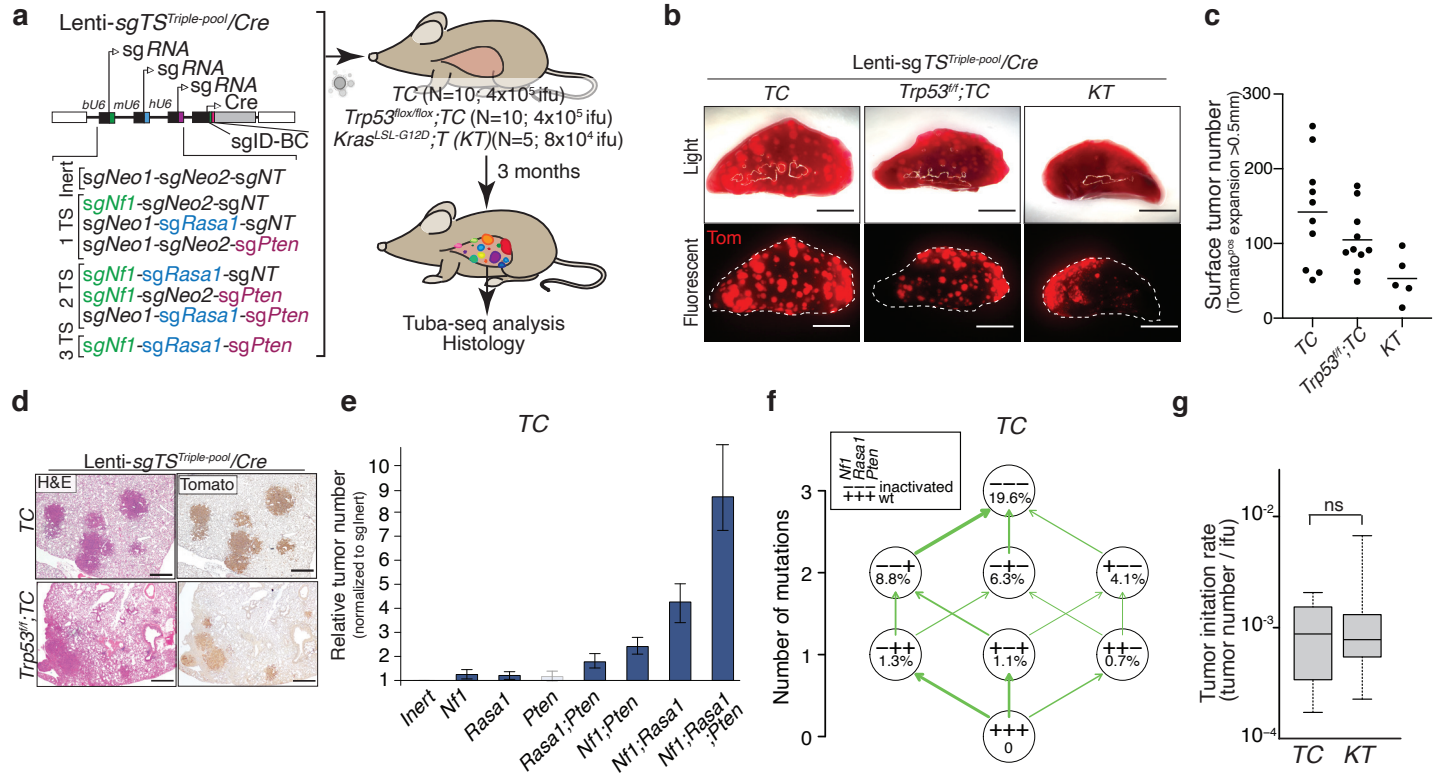

**Figure 3. Inactivation of *Nf1*, *Rasa1*, and *Pten* allows a stepwise acquisition of growth advantage during lung adenocarcinoma development.**

**a.** 8 barcoded triple sgRNA vectors for CRISPR/Cas9-mediated inactivation of all combinations of *Nf1*, *Rasa1*, and *Pten* in *TC* and *Trp53*<sup>flx/flx</sup>;*TC* mice to assess genetic interactions between these tumor suppressors. *sgNeo1* and *sgNeo2* are active cutting, but inert sgRNAs that target *Neo*<sup>R</sup> in the *R26*<sup>LSL-tdTomato</sup> allele. *sgNT* is a non-targeting inert sgRNA. Mouse genotype, mouse number, and titer of virus delivered to each mouse are indicated. Tuba-seq was performed on tumor-bearing lungs 3 months after tumor initiation.

**b.** Bright-field and fluorescence images of lungs from the indicated mouse genotypes. Lung lobes are outlined with a dashed white line. Scale bar = 4 mm

**c.** The number of surface tumors (defined as Tomato-positive expansions larger than 0.5 mm in diameter) quantified by direct counting. Each dot represents a mouse, and the bar is the mean.

**d.** Representative H&E and Tomato stained sections of lungs from *TC* and *Trp53*<sup>flx/flx</sup>;*TC* mice 3 months after transduction with Lenti-*sgTS*<sup>Triple-pool</sup>/*Cre*. Scale bar = 500  $\mu$ m

**e.** Numbers of tumors (with >1000 neoplastic cells) relative to the Inert sgRNA containing expansions. sgRNAs resulting in a significantly higher number of tumors than the inert vector ( $p < 0.05$ ) are shown in a darker color. Mean  $\pm$  95% confidence interval is shown.

**f.** Adaptive landscape of *Nf1*, *Rasa1*, and *Pten* inactivation in *TC* mice is shown. Nodes represent genotypes shown as a string of + (wild-type) and - (inactivated) symbols representing *Nf1*, *Rasa1*, and *Pten*. Numbers in the nodes indicate fitness increase compared to wild-type. The relative probability of each beneficial mutation is shown as arrow widths (see **Methods**).

**g.** Quantification of the ability of combined *Nf1*/*Rasa1*/*Pten* inactivation in *TC* mice and oncogenic *Kras*<sup>G12D</sup> in *KT* mice to initiate tumors. The number of tumors (with >1000 neoplastic cells) per infectious unit (ifu) is shown. The bar is the median, the box represents the interquartile range, and the whiskers show minimum and maximum values. ns: non-significant

Yousefi, Boross *et al.*

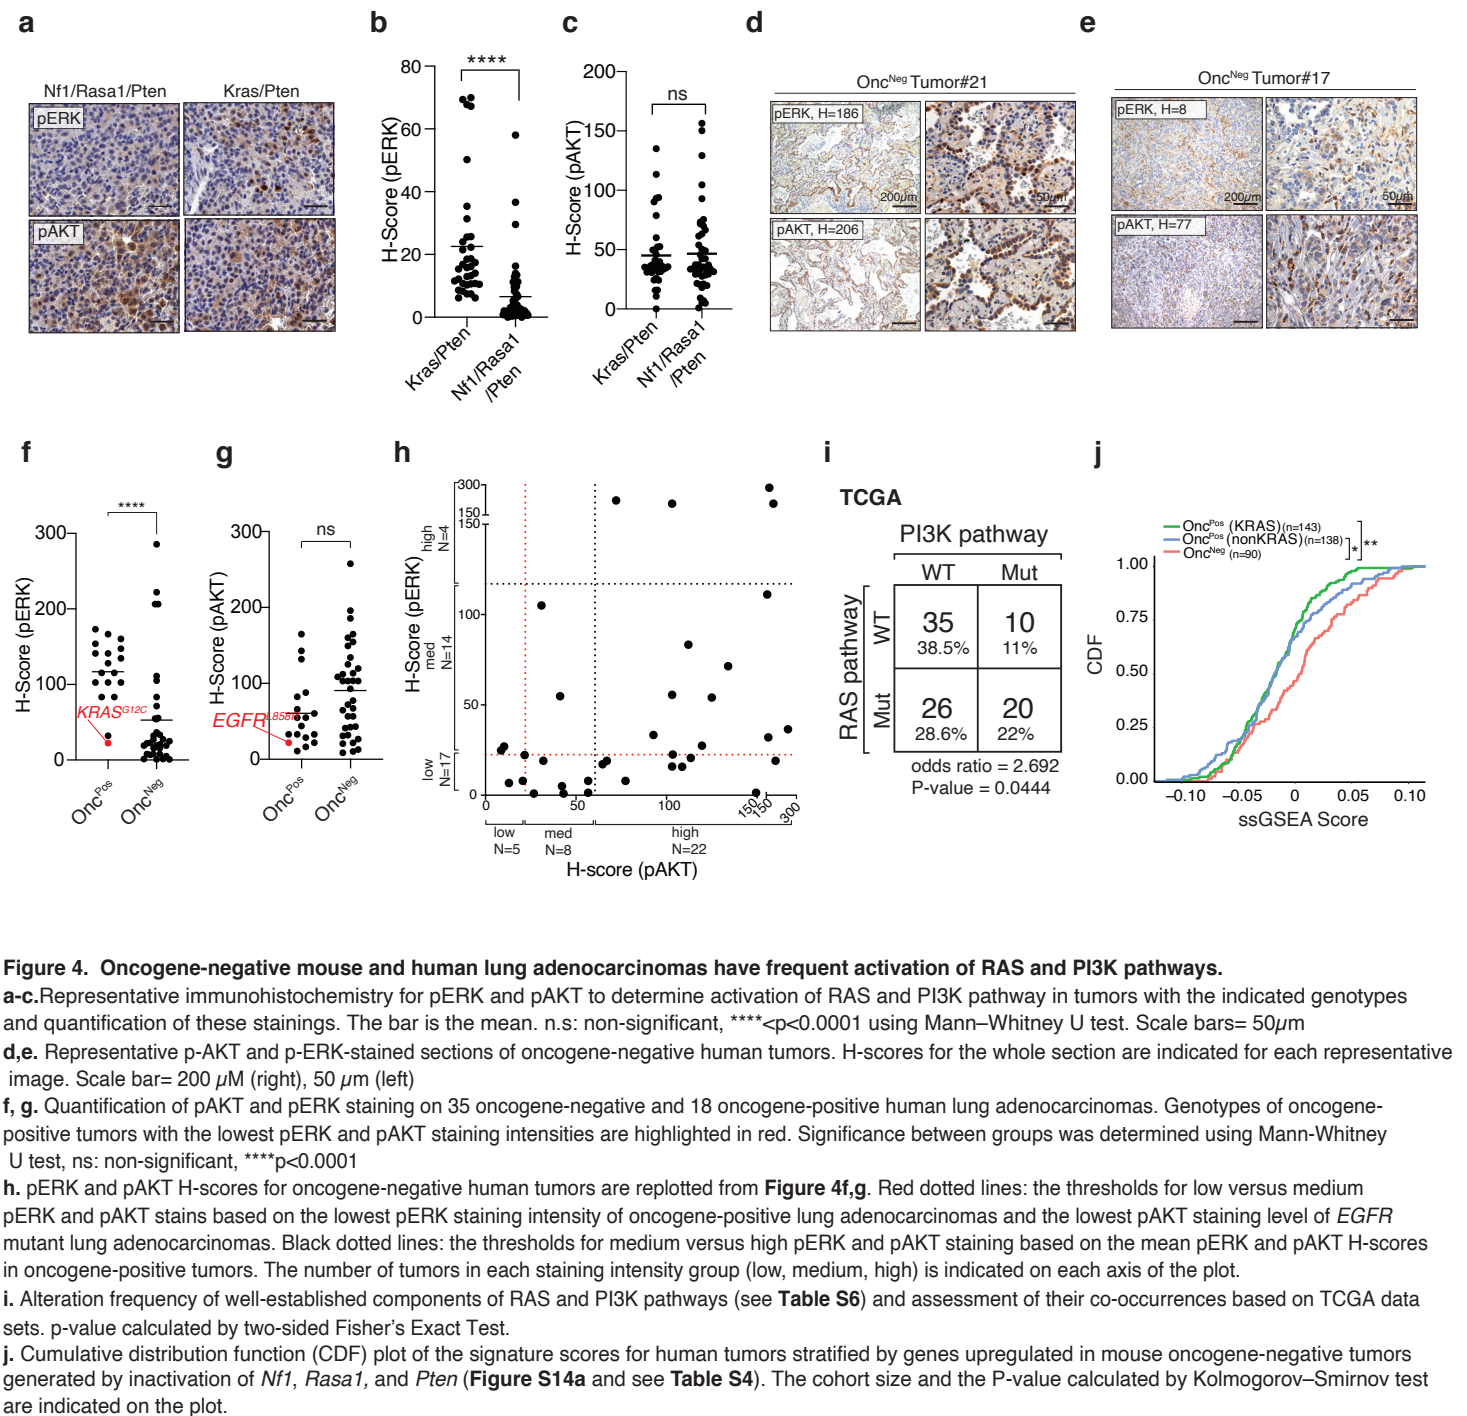

**Figure 4. Oncogene-negative mouse and human lung adenocarcinomas have frequent activation of RAS and PI3K pathways.**

**a-c.** Representative immunohistochemistry for pERK and pAKT to determine activation of RAS and PI3K pathway in tumors with the indicated genotypes and quantification of these stainings. The bar is the mean. n.s.: non-significant, \*\*\*\* $p < 0.0001$  using Mann-Whitney U test. Scale bars= 50  $\mu$ m

**d,e.** Representative p-AKT and p-ERK-stained sections of oncogene-negative human tumors. H-scores for the whole section are indicated for each representative image. Scale bar= 200  $\mu$ m (right), 50  $\mu$ m (left)

**f, g.** Quantification of pAKT and pERK staining on 35 oncogene-negative and 18 oncogene-positive human lung adenocarcinomas. Genotypes of oncogene-positive tumors with the lowest pERK and pAKT staining intensities are highlighted in red. Significance between groups was determined using Mann-Whitney U test, ns: non-significant, \*\*\*\* $p < 0.0001$

**h.** pERK and pAKT H-scores for oncogene-negative human tumors are replotted from **Figure 4f,g**. Red dotted lines: the thresholds for low versus medium pERK and pAKT stains based on the lowest pERK staining intensity of oncogene-positive lung adenocarcinomas and the lowest pAKT staining level of *EGFR* mutant lung adenocarcinomas. Black dotted lines: the thresholds for medium versus high pERK and pAKT staining based on the mean pERK and pAKT H-scores in oncogene-positive tumors. The number of tumors in each staining intensity group (low, medium, high) is indicated on each axis of the plot.

**i.** Alteration frequency of well-established components of RAS and PI3K pathways (see **Table S6**) and assessment of their co-occurrences based on TCGA data sets. p-value calculated by two-sided Fisher's Exact Test.

**j.** Cumulative distribution function (CDF) plot of the signature scores for human tumors stratified by genes upregulated in mouse oncogene-negative tumors generated by inactivation of *Nf1*, *Rasa1*, and *Pten* (**Figure S14a** and see **Table S4**). The cohort size and the P-value calculated by Kolmogorov-Smirnov test are indicated on the plot.

Yousefi, Boross et al.

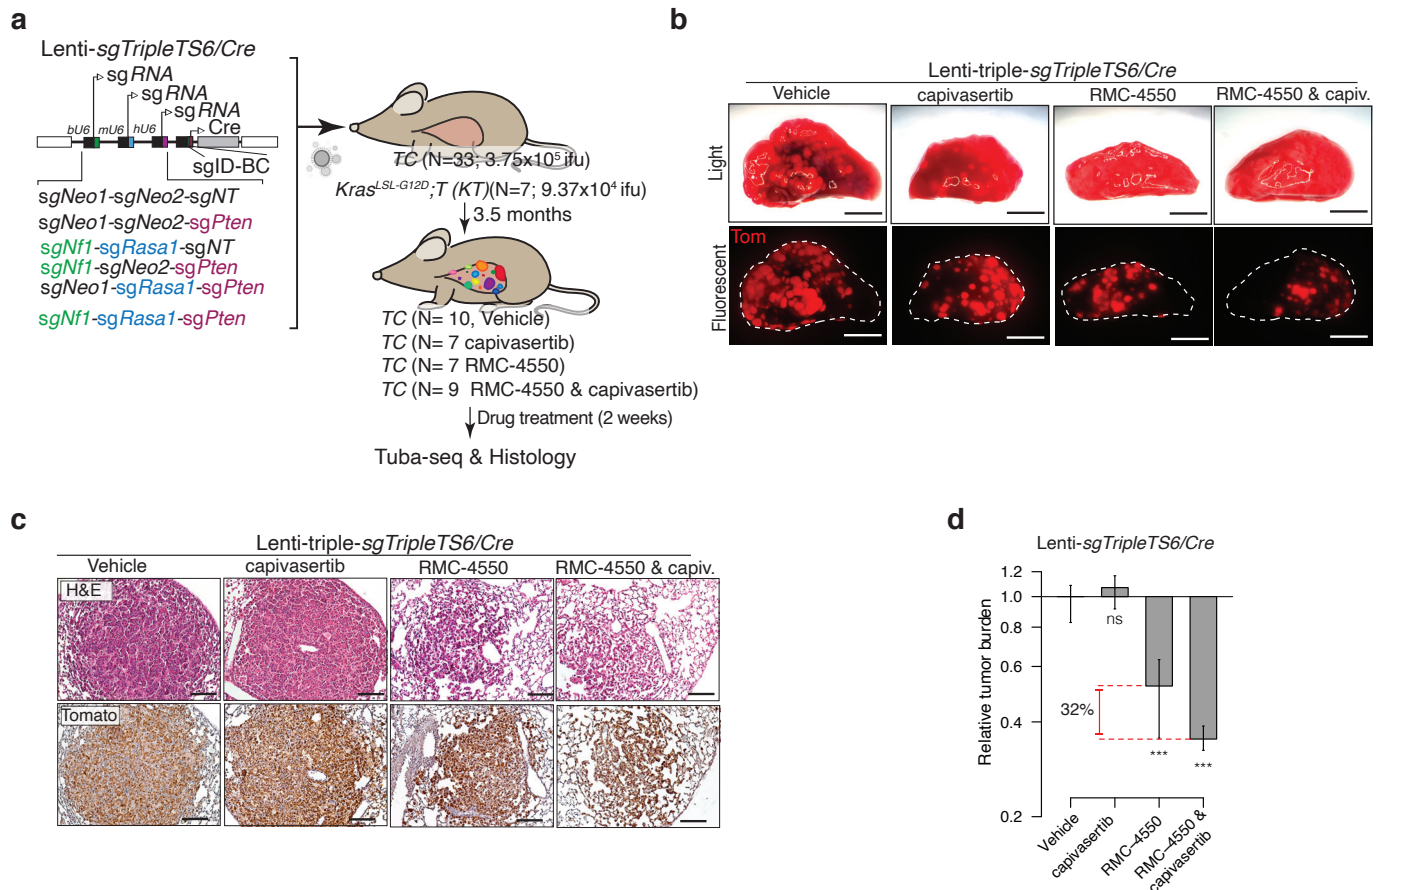

**Figure 5. SHP2 and AKT inhibition synergize to reduce the growth of autochthonous oncogene-negative lung tumors.**

**a.** Barcoded triple sgRNA vectors for CRISPR/Cas9-mediated inactivation of combinations of *Nf1*, *Rasa1*, and *Pten* in TC mice to determine the response of oncogene-negative tumors to pharmacological inhibition of RAS and PI3K pathways. Indicated numbers of mice were treated with RMC-4550 (SHP2 inhibitor), capivasertib (AKT inhibitor), or combination of these two drugs for two weeks 3.5 months after tumor initiation. Tuba-seq and histological analysis were performed on tumor-bearing lungs followed by analysis of tumor response to therapies.

**b.** Bright-field and fluorescence images of lungs from the indicated mice. Lung lobes are outlined with a dashed white line. Scale bars = 4 mm

**c.** Representative H&E and Tomato-stained sections of tumors from TC mice 3.5 months after transduction with Lenti-sgTripleTS6/Cre and two weeks after treatment with the indicated drugs. Scale bars = 100  $\mu$ m

**d.** Relative tumor burden in mice after treatment with capivasertib, RMC-4550, and combination of these two drugs compared with tumor burden in vehicle-treated mice. ns: non-significant, \*\*\* $p < 0.001$ . Drug response is shown for all the tumors.

Yousefi, Boross *et al.*

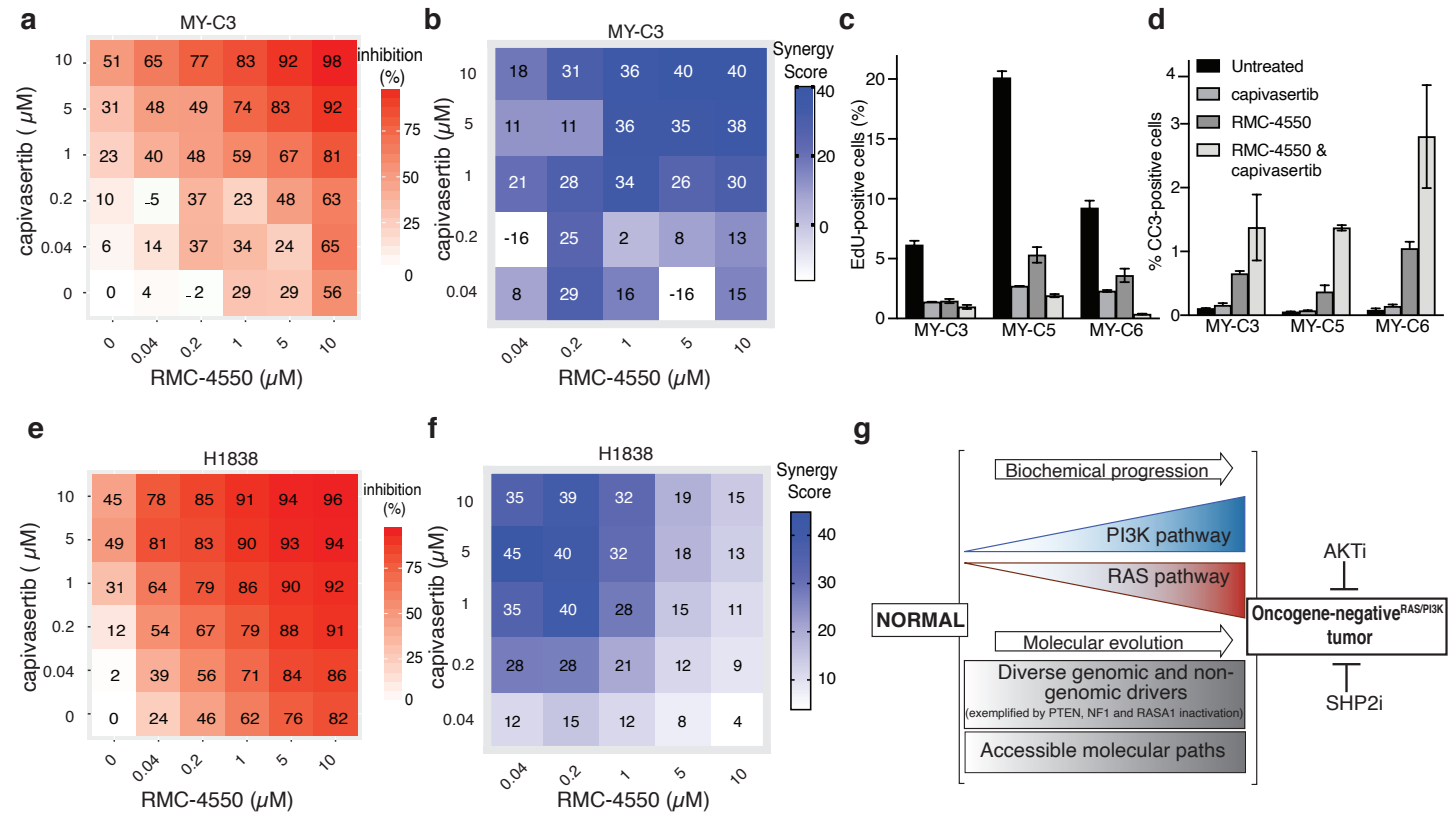

**Figure 6. RMC-4550 and capivasertib synergize to inhibit the growth of Onc-negative<sup>RAS/PI3K</sup> lung adenocarcinoma cell lines.**

**a.** Drug dose-response matrix depicting % growth inhibition of murine Onc-negative<sup>RAS/PI3K</sup> cell line after four days of treatment with the indicated doses of RMC-4550 and capivasertib. The average responses of three to four replicates are shown for each drug/drug combination. (see also **Figure S17 a-h**)

**b.** Loewe's synergy score calculated based on drug responses in **Figure 6a**. Synergy scores indicate the percentage of response beyond expectation.

**c,d.** Cell proliferation and apoptosis analysis using EdU incorporation, cleaved caspase 3 staining, and flow-cytometry analysis. Three independent Onc-negative<sup>RAS/PI3K</sup> murine cell lines were treated with 10  $\mu$ M of the indicated drug/drugs for 2 days before the analysis.

**e.** Drug dose-response matrix depicting % growth inhibition of H1838, a human oncogene-negative<sup>RAS/PI3K</sup> lung adenocarcinoma cell line.

**f.** Loewe's synergy score calculated based on drug responses in **Figure 6e**.

**g.** Model of biochemical progression and molecular drivers of Onc-negative<sup>RAS/PI3K</sup> tumors.



Yousefi, Boross *et al.*

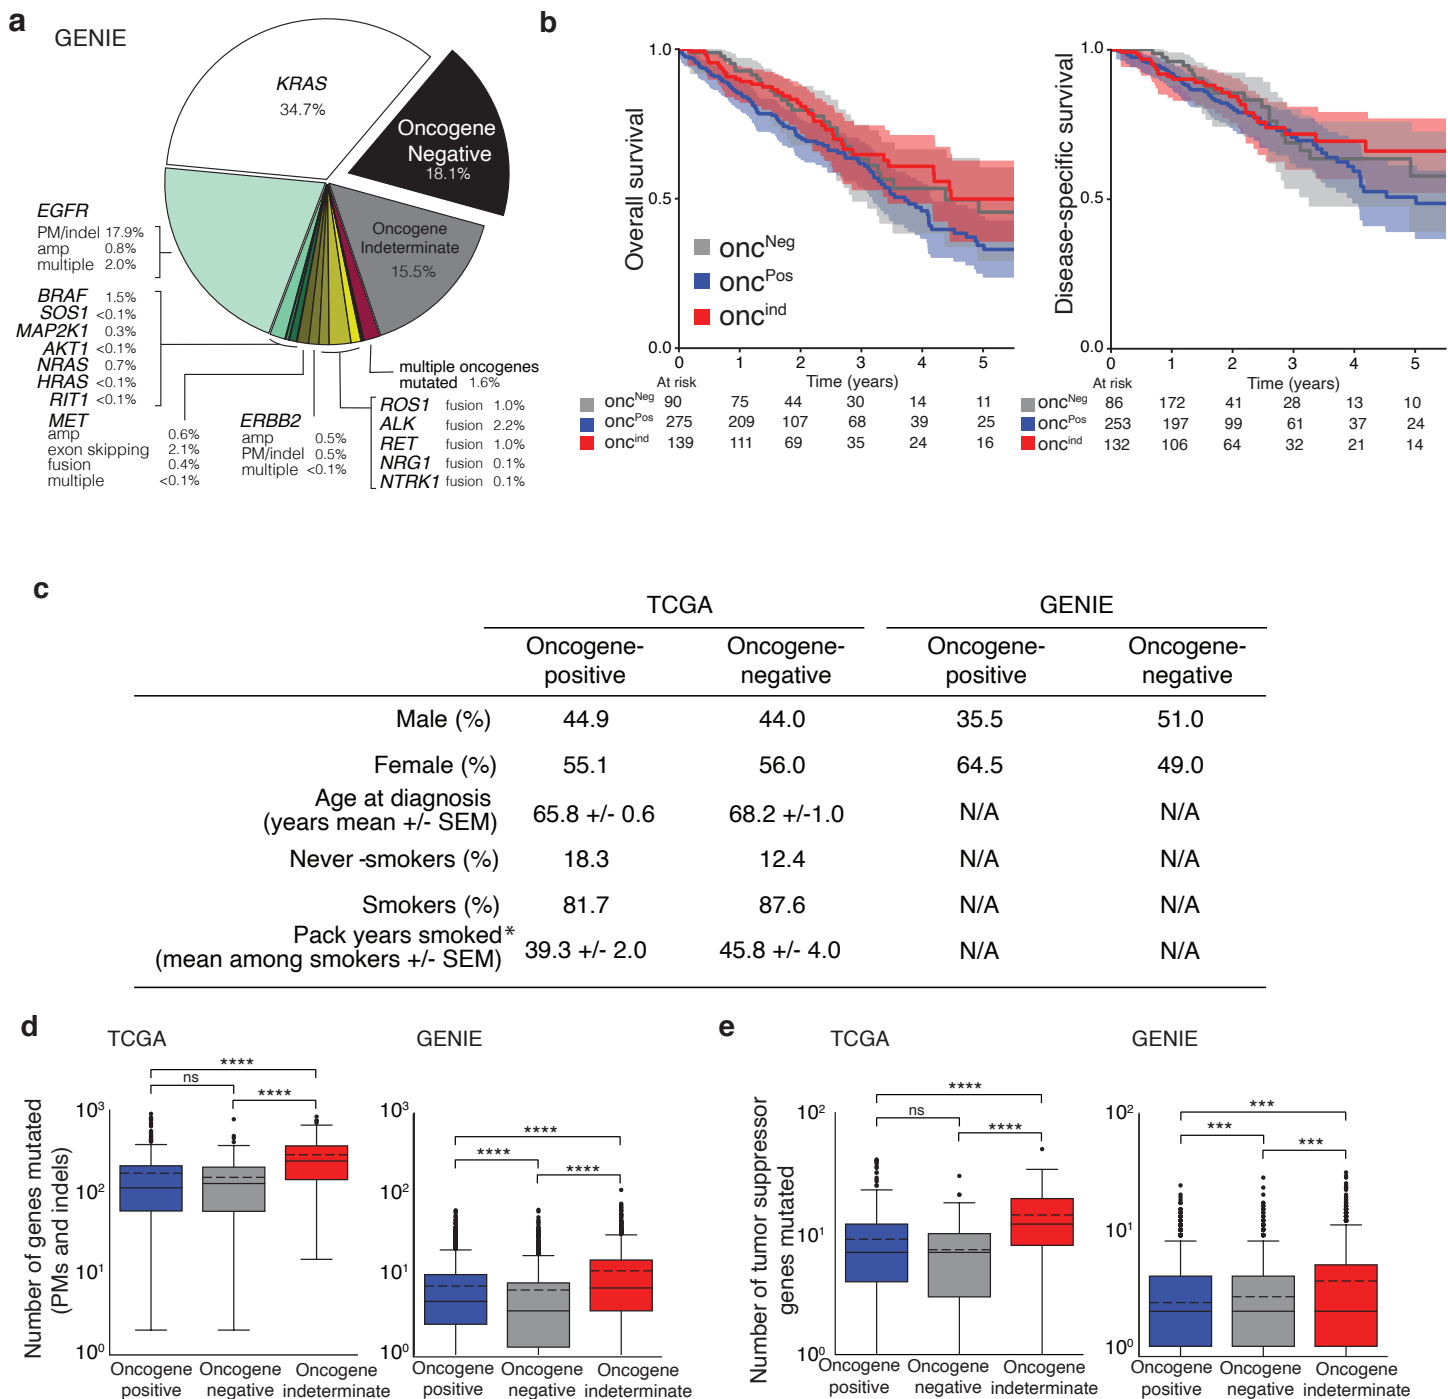

**Figure S1. Clinical and molecular features of oncogene-negative human lung adenocarcinomas.**

**a.** Frequency of human oncogene-positive, oncogene-indeterminate, and oncogene-negative lung adenocarcinomas based on GENIE data sets. PM: point mutation, indel: insertion and deletion, amp: amplification, multiple: multiple oncogenic alterations in the same gene (see **Methods**)

**b.** Overall survival and disease-specific survival of oncogene-positive (Onc<sup>Pos</sup>), oncogene-indeterminate (Onc<sup>Ind</sup>), and oncogene-negative (Onc<sup>Neg</sup>) lung adenocarcinoma patients based on TCGA data. The numbers below the plots are the numbers of patients alive at each time point.

**c.** Clinical characteristics of oncogene-positive and oncogene-negative patients based on TCGA and GENIE data sets. SEM - standard error of the mean. N/A - information not present in this dataset. The p-values were calculated using Mann Whitney U test, \* p<0.05 .

**d,e.** The number of mutated genes (**d**, by point mutations (PMs) and indels) and number of mutated tumor suppressor genes (**e**, by point mutations, indels, or deletions) in oncogene-positive, oncogene-indeterminate, and oncogene-negative tumors based on TCGA and GENIE data sets. The mean is represented by the dashed line and the median by the straight line. \*\*\*\*p<0.0001, p-values were calculated using Mann Whitney U test.

Yousefi, Boross *et al.*

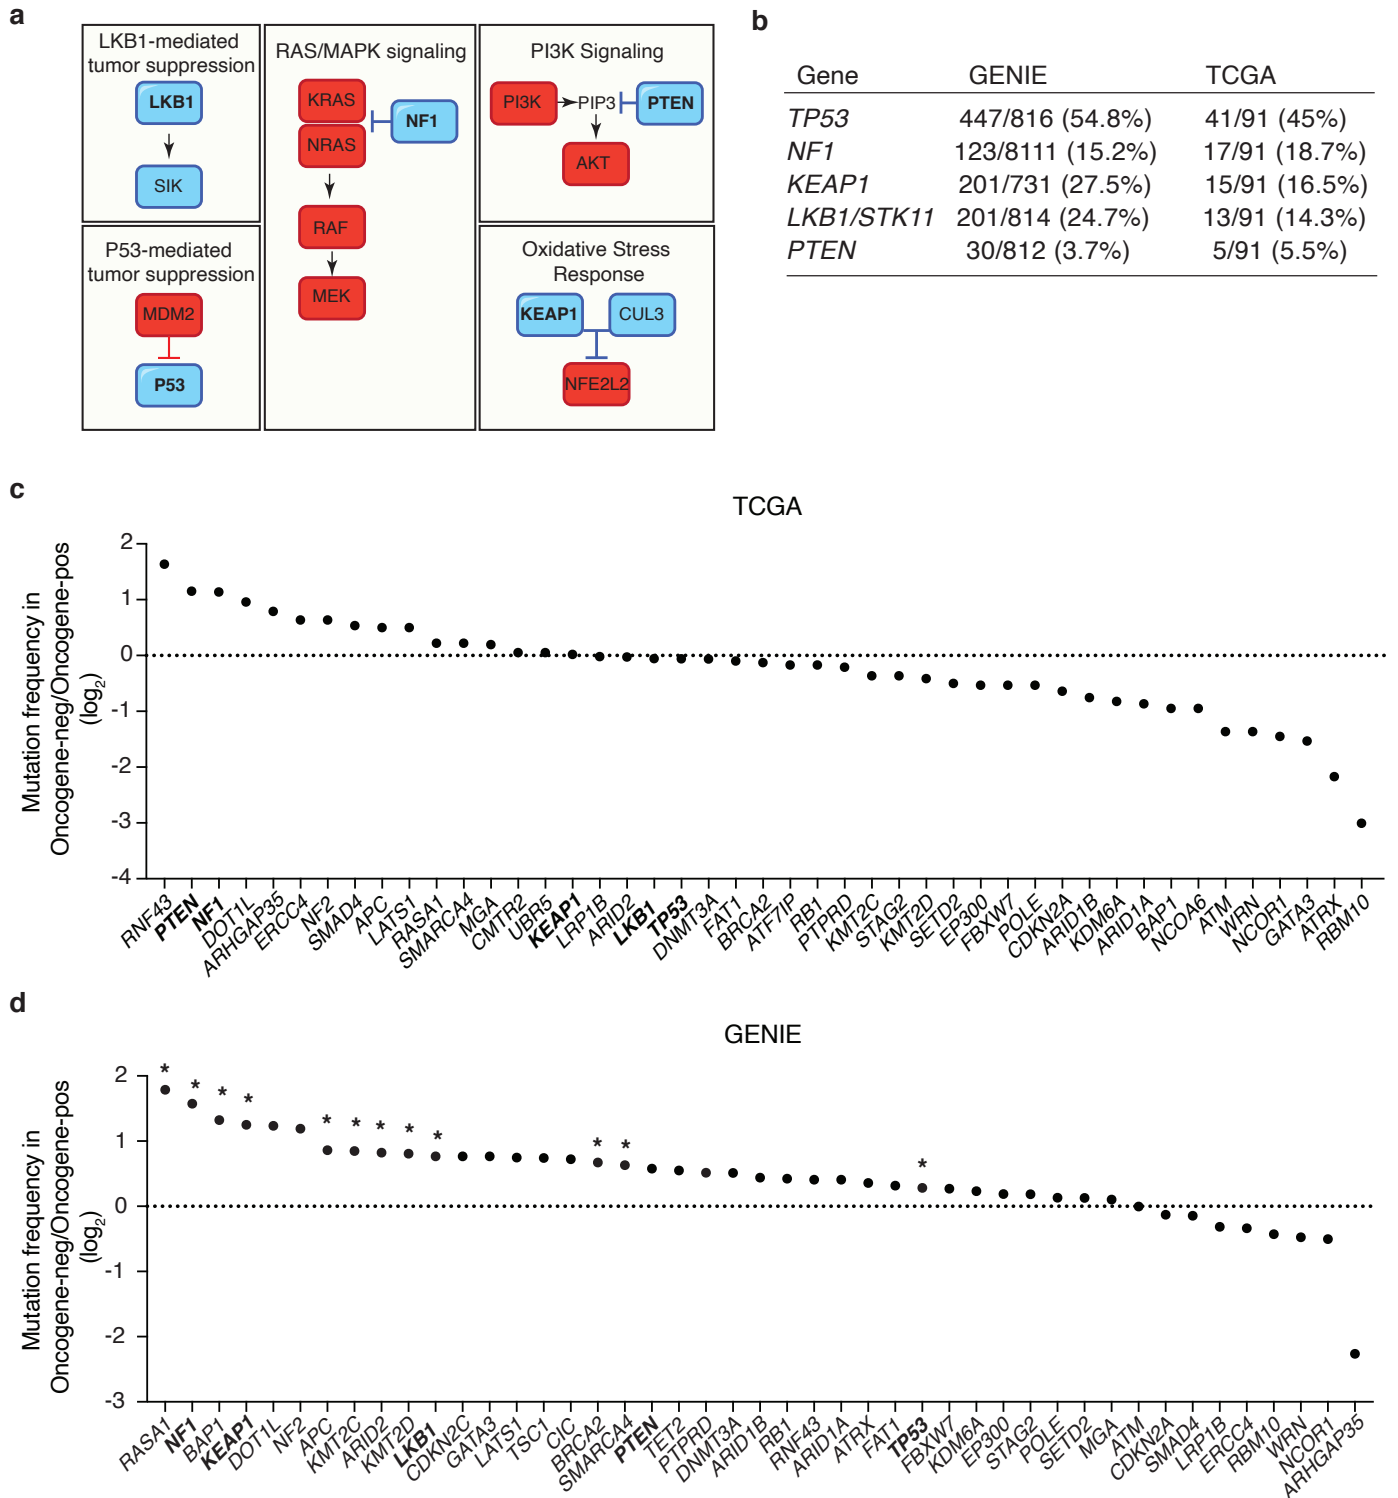

**Figure S2. Tumor suppressor gene alterations in oncogene-negative lung adenocarcinoma.**

**a.** Schematic of the pathways controlled by the five tumor suppressor genes inactivated using floxed alleles (“core” tumor suppressor genes) in this study. The tumor suppressors represent different key cancer pathways.

**b.** Alteration frequency of “core” tumor suppressor genes (number of tumors with potentially inactivating missense or nonsense mutations or focal DNA copy number losses/ total tumor number) in oncogene-negative lung adenocarcinomas based on GENIE and TCGA data sets.

**c,d.** The ratio of the frequency of inactivating alterations of tumor suppressor genes (point mutations, indel, and copy number loss) of the genes in the Lenti-sg *TS102/Cre* and Lenti-sg *TS15/Cre* pools in oncogene negative versus oncogene-positive lung adenocarcinomas. Data from TCGA (**c**) and GENIE (**d**) data sets are shown. The dotted line represents equal frequency in oncogene-negative and oncogene-positive lung adenocarcinomas. The “Core” tumor suppressors are in bold. \*FDR<0.05

Yousefi, Boross *et al.*

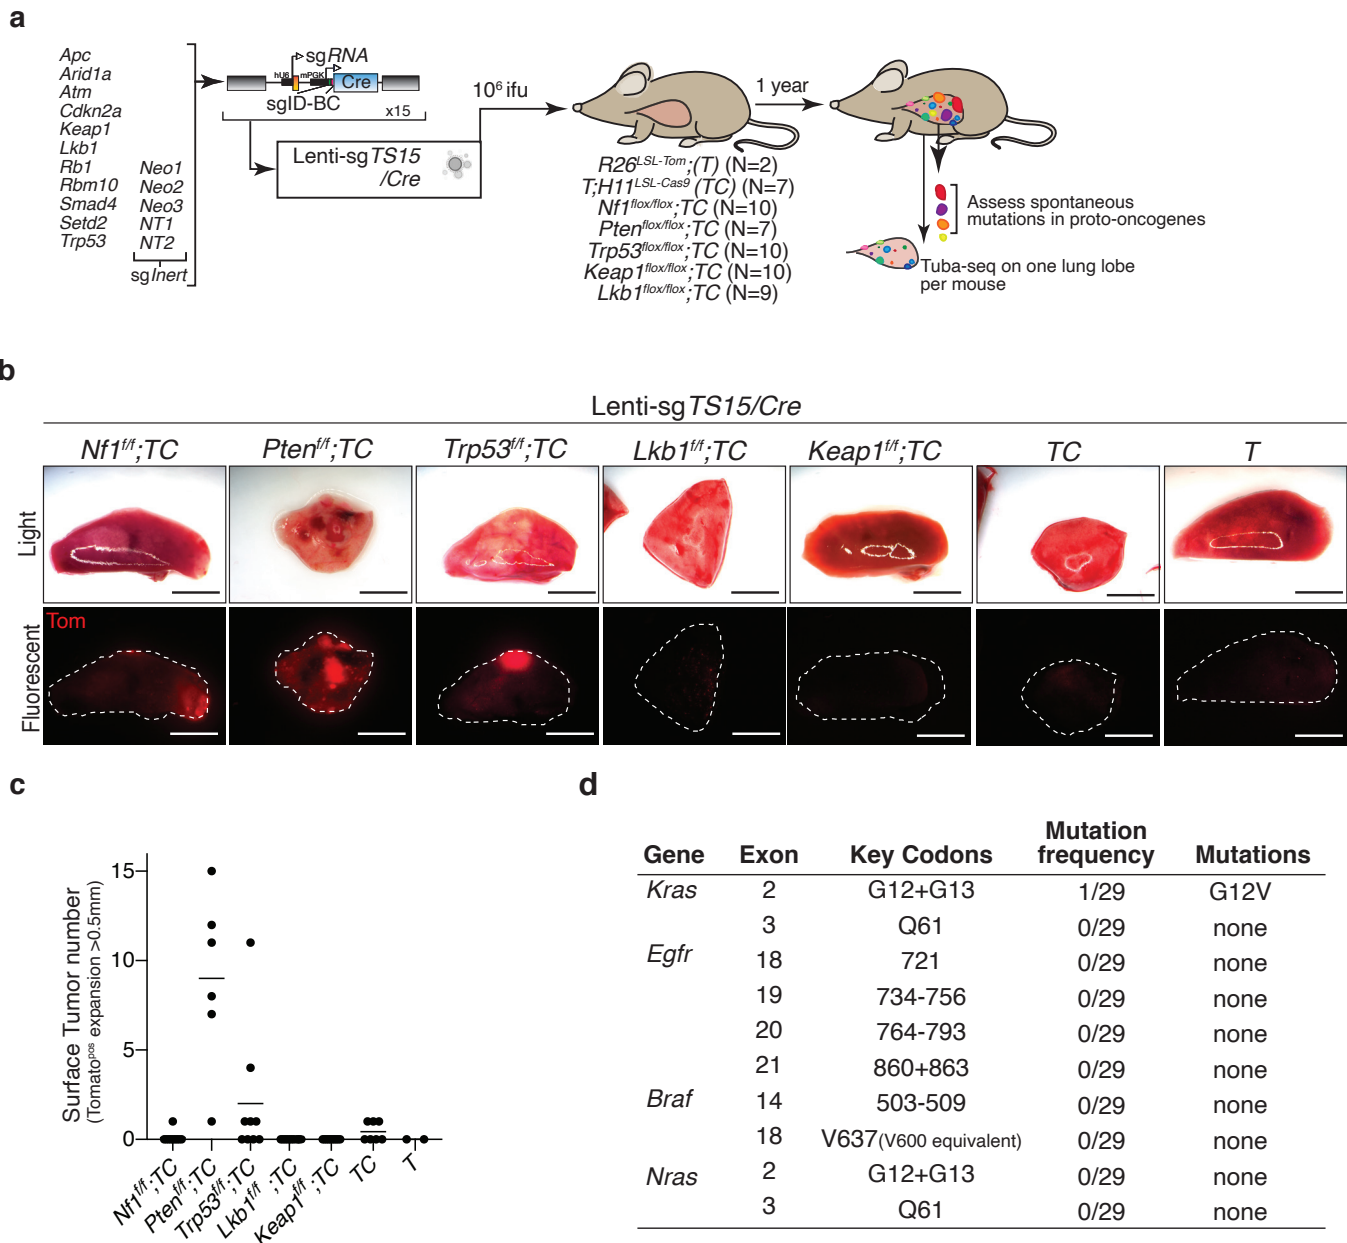

**Figure S3. Most tumors in *Nf1*<sup>ff</sup>;TC, *Pten*<sup>ff</sup>;TC, and *Trp53*<sup>ff</sup>;TC mice arise in the absence of mutations in the proto-oncogenes.**

**a.** Schematic of combined Cre/lox and CRISPR/Cas9-mediated tumor suppressor gene inactivation to generate lung epithelial cells with diverse genotypes.

**b.** Representative light and fluorescence images of lung lobes from the indicated genotypes of mice. Lung lobes are outlined with white dotted lines. Scale bar = 4 mm

**c.** The number of tumors (defined as Tomato-positive expansions greater than 0.5 mm in diameter) was quantified by direct counting. Each dot represents a mouse, and the bar is the mean.

**d.** Exons in known proto-oncogenes that were analyzed by targeted sequencing. Key codons are those in which mutations are associated with oncogenic activity. Mutation frequency is the number of tumors with putative oncogenic mutations over the total number of samples analyzed. Putative oncogenic mutations are defined in **Methods**.

Yousefi, Boross *et al.*

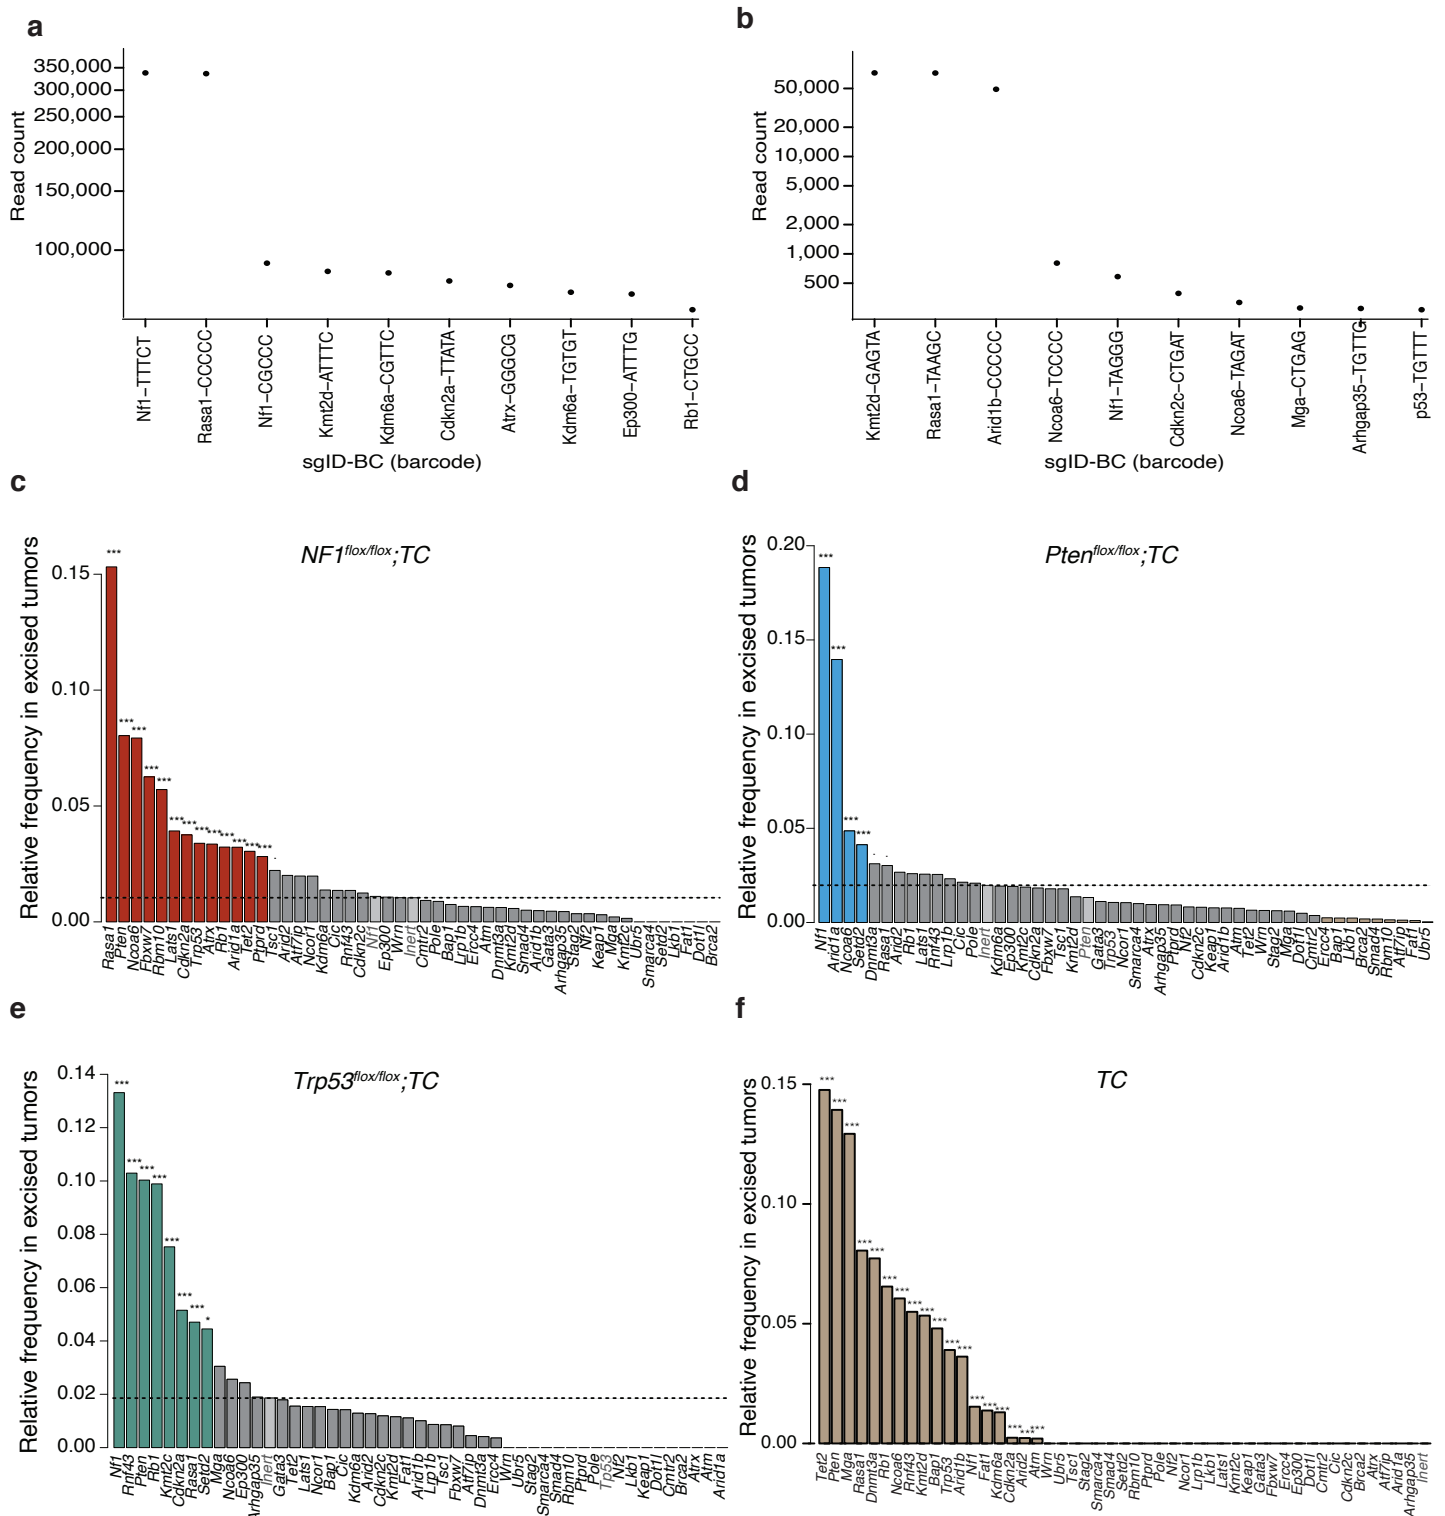

**Figure S4. Identification of tumor suppressor genes that constrain lung tumor formation *in vivo*.**

**a,b.** Example plots indicating evidence of transduction with multiple barcoded lentiviral vectors. The 10 sgID-BCs with the highest read counts from two excised tumors are shown. Each dot represents a sgID-BC, the y-axis shows read count, and the sgID-BCs are sorted on the x-axis by decreasing read counts (the first 5 nucleotides of the random barcode are shown with the targeted gene symbol). The first two and three barcodes (sgID-BC) in subpanels a and b, respectively, that have very similar read counts likely represent a single clonal tumor initiated from a cell transduced with multiple barcoded Lenti-sgRNA/Cre vectors (see **Methods** Multiple transduction section).

**c-f.** Relative frequency of sgRNAs targeting each tumor suppressor gene in tumors harvested from the indicated genotypes of mice. Tumors were dissected under a fluorescence microscope based on their tdTomato fluorescent signal and were subjected to genomic DNA extraction. The sgID-BC region was PCR amplified and sequenced using Illumina high-throughput sequencing. The dotted lines represent the frequency of the inert sgRNA (average of all inert sgRNAs). Genes significantly overrepresented compared to the inert sgRNA are shown as: \*\*\*  $p < 0.001$ , \*  $p < 0.05$ , ·  $p < 0.1$ . Light gray bars indicate sgRNAs targeting the “core” tumor suppressor gene that is inactivated with floxed alleles in each plot and the inert sgRNAs.



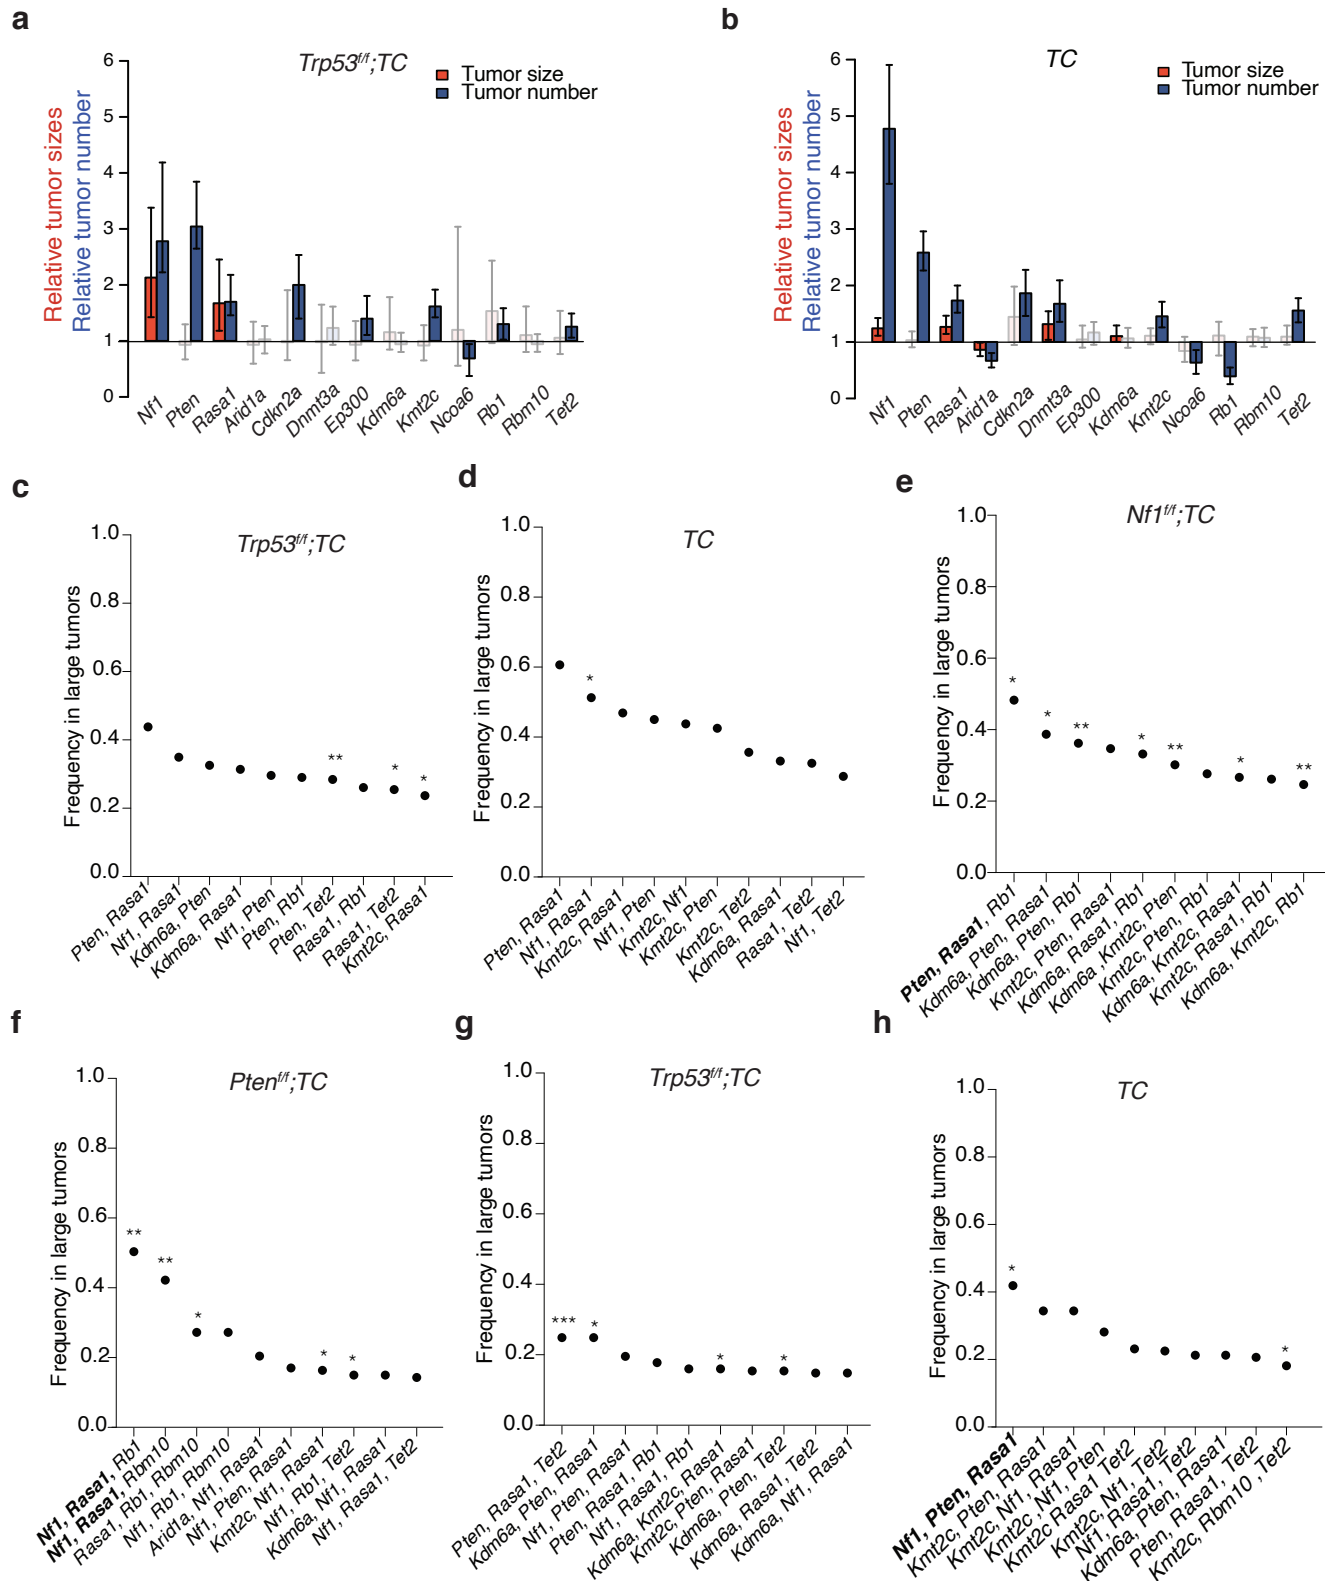

**Figure S6. *Nf1*, *Rasa1*, and *Pten* are frequently targeted in the largest tumors of *Nf1<sup>fl</sup>;TC*, *Pten<sup>fl</sup>;TC*, *Trp53<sup>fl</sup>;TC*, and *TC* mice.**

**a, b.** The number of tumors with a minimum size of 1000 cells relative to the inert guide is shown as a blue bar. 90<sup>th</sup> percentile of tumor sizes relative to the inert sgRNA is shown as a red bar. sgRNAs resulting in a significantly higher number or larger tumors than the inert sgRNA ( $p < 0.05$ ) are shown in color. Whiskers show 95% confidence intervals. Mouse genotypes are indicated on each plot.

**c-h.** Depiction of the top 10 most frequently co-occurring tumor suppressor alterations in each indicated genotype. Barcodes with the highest cell count in each mouse were investigated for coinfection for multiple viruses (see **Methods**). The top 10 pairs of tumor suppressors found co-mutated in the largest tumors are shown. \* $p < 0.05$ , \*\* $p < 0.01$ , \*\*\* $p < 0.001$  based on a permutation test. Combinations of sgRNAs that lead to the generation of *Nf1*, *Rasa1*, and *Pten* mutant cancer cells in a statistically significant manner are in bold.





Yousefi, Boross et al.

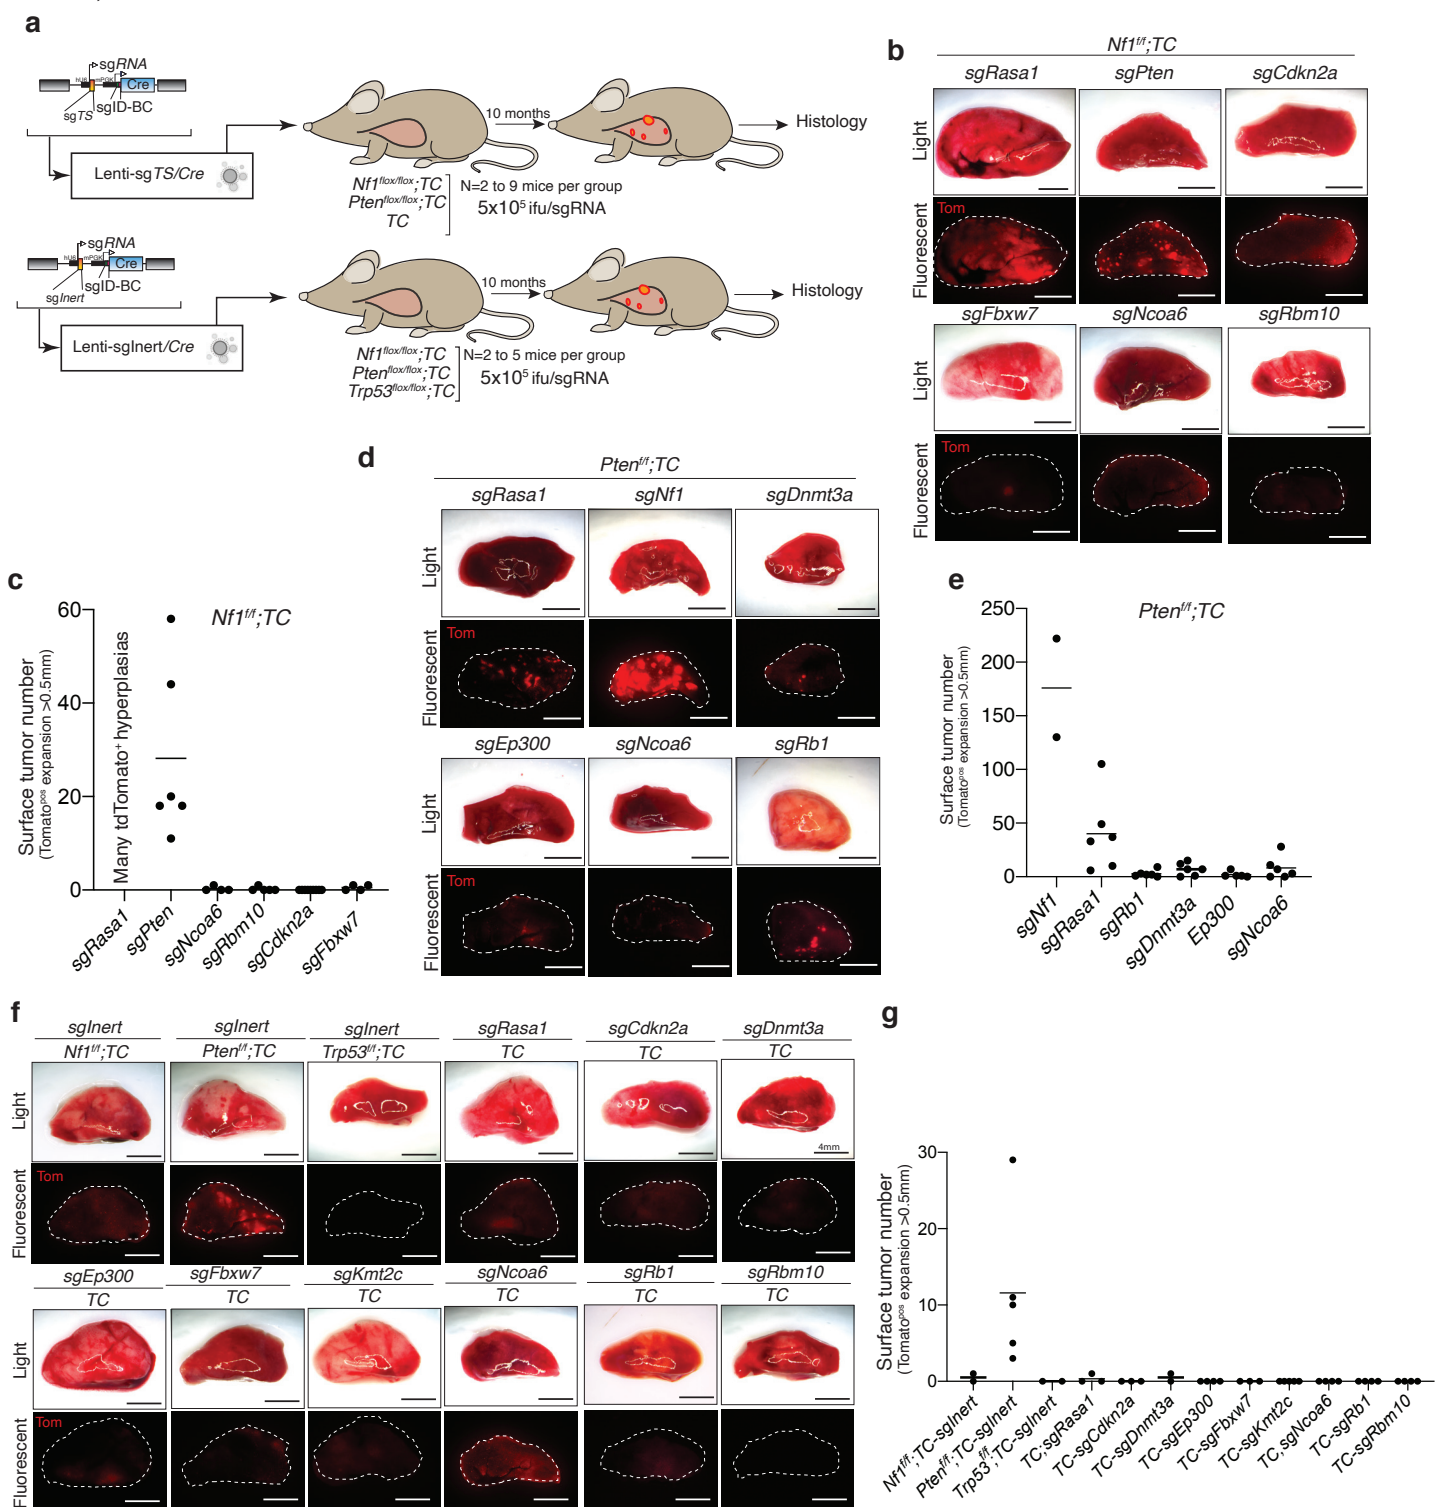

**Figure S8. Single and Pairwise tumor suppressor gene inactivation is rarely sufficient to generate lung tumors.**

**a.** Schematic of experiments to assess the potential of single or paired tumor suppressor inactivation to generate lung tumors.  
**b,d,f.** Representative light and fluorescence images of lung lobes from the indicated genotypes of mice. Lung lobes are outlined with white dotted lines. Scale bar=4mm  
**c,e,g.** The numbers of tumors (defined as Tomato-positive cell expansions greater than 0.5mm in diameter) was quantified by direct counting. Each dot represents a mouse, and the bar is the mean. The genotypes of the recipient mice and the gene targeted by sgRNA are indicated. Inactivation of *Rasa1* in *Nf1<sup>fl/+</sup>;TC* mice in **S8b,c** generated numerous tdTomato<sup>+</sup> hyperplasias without distinguishable boundaries under the microscope. As a result, surface tumor number was not quantifiable for this group.



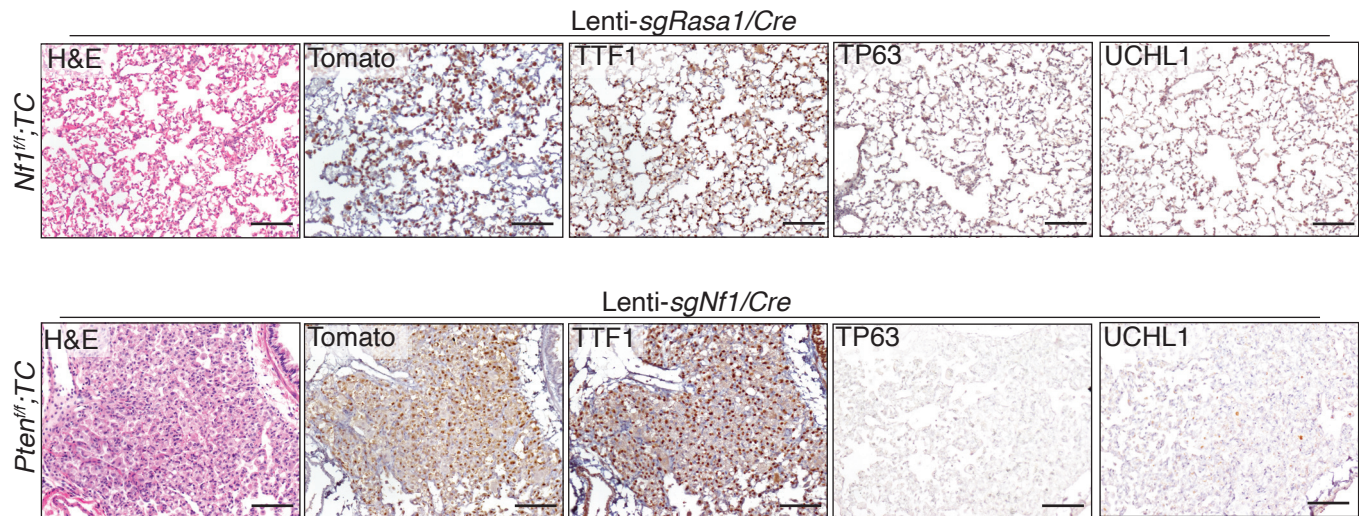

**Figure S9. Pairwise inactivation of tumor suppressor genes rarely generates lung adenocarcinomas.**

Representative H&E, Tomato, TTF1, TP63, and UCHL1-stained sections of tumors from *Nf1<sup>fl</sup>;TC* and *Pten<sup>fl</sup>;TC* mice 10 months after transduction with *Lenti-sgRasa1/Cre* or *Lenti-sgNf1/Cre*. Scale bars= 100  $\mu$ m

Yousefi, Boross *et al.*

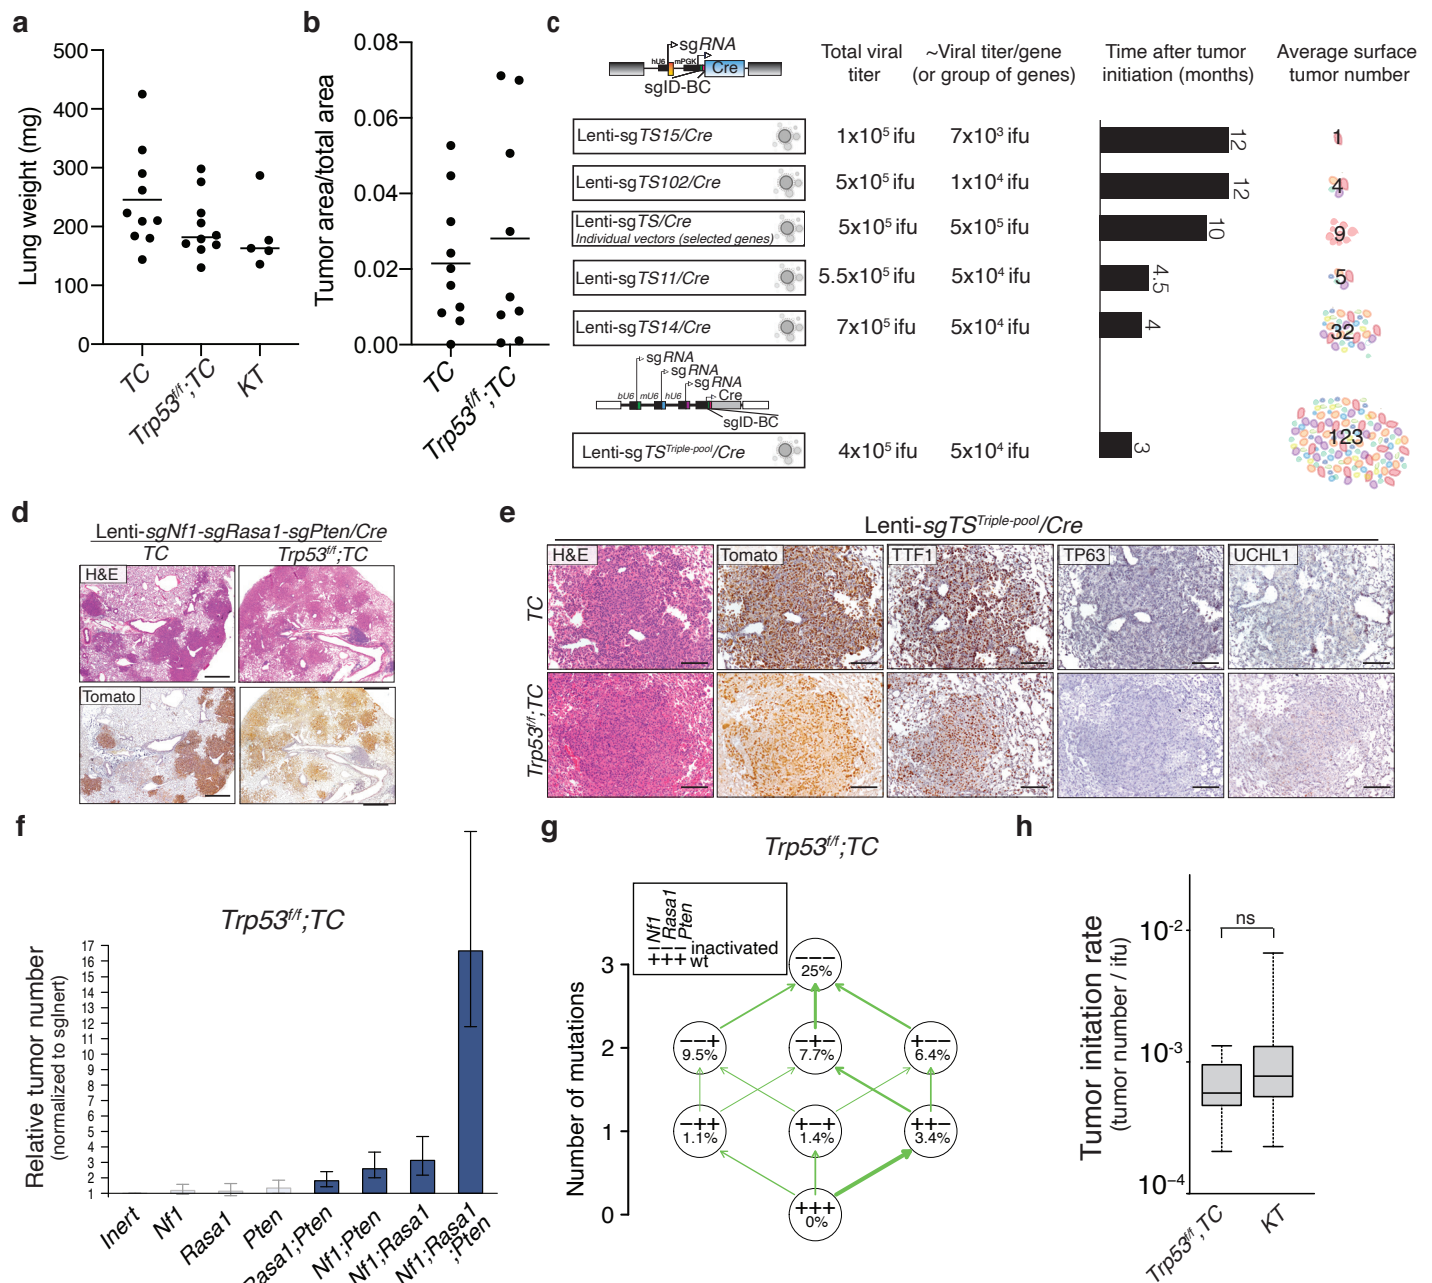

**Figure S10. The relative contribution of *Nf1*, *Rasa1*, and *Pten* to oncogene-negative lung tumor development is not impacted by *Trp53* inactivation.**

**a.** Tumor burden, represented by lung weight. Each dot represents a mouse and the bar is the mean.

**b.** Quantification of tumor burden based on H&E images. Each dot represents one lung lobe from each mouse, and the bar is the mean.

**c.** Schematic of the increase in the number of oncogene-negative lung tumors generated in mice by enriching sgRNAs targeting the most potent tumor suppressor genes in each round of functional genomic screening *in vivo*. The viral titer, number of months after tumor initiation, and average number of tumors are indicated.

**d.** Representative H&E and Tomato stained sections from TC and Trp53<sup>fl/fl</sup>;TC mice 3 months after transduction with Triple-Lenti-sg<sup>Nf1</sup>-sg<sup>Rasa1</sup>-sg<sup>Pten</sup>/Cre. Scale bar= 500µm

**e.** Representative H&E, Tomato, TTF1, TP63, and UCHL1-stained sections of tumors from TC and Trp53<sup>fl/fl</sup>;TC mice 3 months after transduction with Lenti-sg<sup>TS<sup>Triple-pool</sup></sup>/Cre. Scale bar = 100 µm

**f.** Numbers of tumors (with >1000 neoplastic cells) are shown relative to Inert sgRNA. sgRNAs resulting in a significantly higher number of tumors than sgInert (p<0.05) are shown in color. Mean +/- 95% confidence interval is shown.

**g.** Adaptive landscape of *Nf1*, *Rasa1*, and *Pten* inactivation in Trp53<sup>fl/fl</sup>;TC is shown. Nodes represent genotypes shown as a string of + (wild-type) and - (inactivated) symbols representing *Nf1*, *Rasa1*, and *Pten*. Numbers in the nodes indicate fitness increase compared to wild-type. The relative probability of each beneficial mutation is shown as arrow widths (see **Methods**).

**h.** Quantification of the ability of combined *Nf1*/*Rasa1*/*Pten* inactivation in TC mice and oncogenic Kras<sup>G12D</sup> in KT mice to initiate tumors. Number of tumors (with >1000 neoplastic cells) per infectious unit (ifu) is shown. The bar is the median, the box represents the interquartile range, and the whiskers show minimum and maximum values. n.s: non-significant



Yousefi, Boross et al.

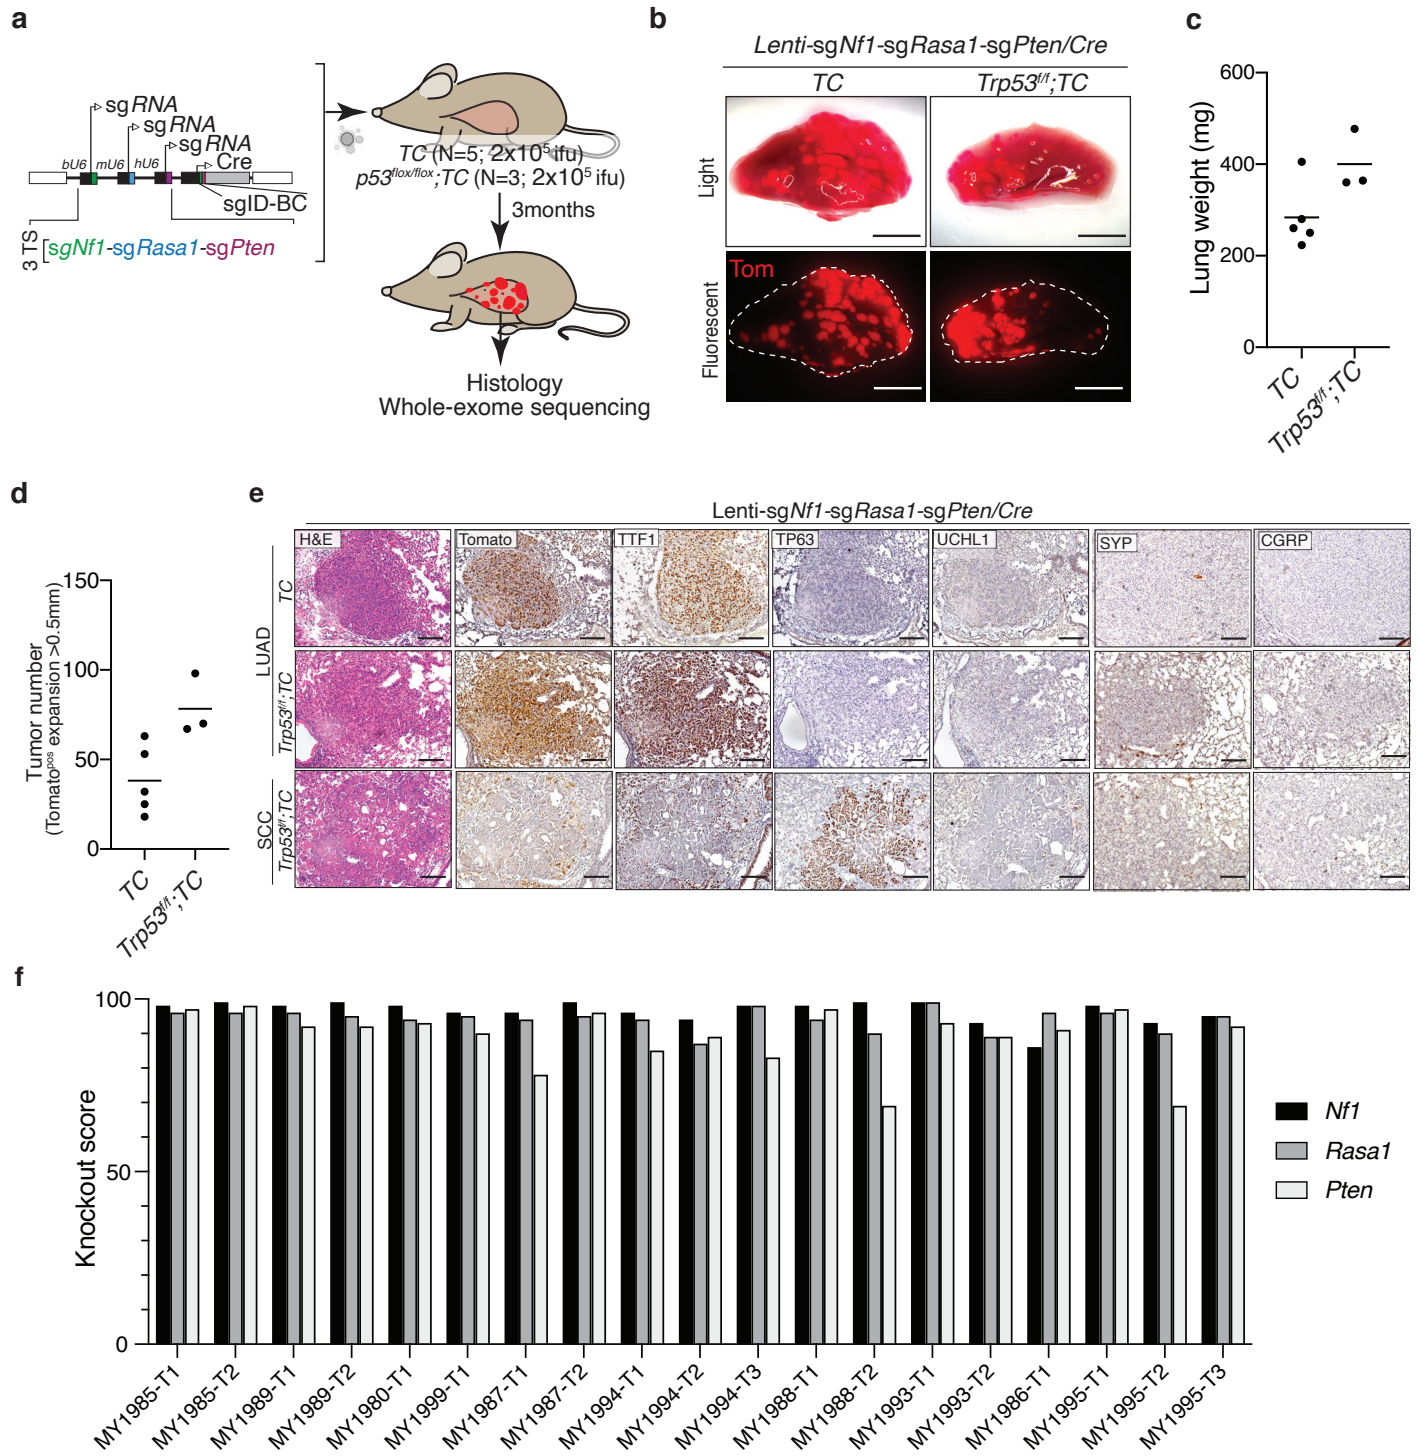

**Figure S11. Oncogene-negative lung tumors driven by inactivation of *Nf1*, *Rasa1*, and *Pten* are almost exclusively adenomas/adenocarcinoma.**

**a.** Schematic of inactivation of *Nf1*, *Rasa1*, and *Pten* in TC and *Trp53<sup>fl/fl</sup>*;TC mice utilizing triple guide vectors and CRISPR/Cas9-mediated gene-inactivation. Mouse genotype, mouse number, and titer of virus delivered to each mouse are indicated. ifu, infection unit

**b.** Bright-field and fluorescence images of lungs from the indicated mice 3 months after tumor initiation with Lenti-*sgNf1*-*sgRasa1*-*sgPten*/Cre virus. Lung lobes are outlined with a dashed white line. Scale bars=4 mm

**c.** Tumor burden, represented by lung weight. Each dot represents a mouse, and the bar is the mean.

**d.** Quantification of tumor number based on H&E images of one lung lobe from each mouse. Each dot represents one lung lobe from each mouse, and the bar is the mean.

**e.** Representative H&E, Tomato, TTF1, TP63, UCLH1, SYNAPTOPHYSIN (SYP), and CGRP-stained tumor sections from TC and *Trp53<sup>fl/fl</sup>*;TC mice 3 months after transduction with Lenti-*sgNf1*-*sgRasa1*-*sgPten*/Cre. Squamous cell lung cancer was only rarely observed in *Trp53<sup>fl/fl</sup>*;TC mice (3 out of 264 tumors). Scale bars= 100  $\mu$ m

**f.** Analysis of insertion and deletion in genomic DNA from FACS sorted tumors of 19 TC mice 4 months after transduction with  $5 \times 10^4$  ifu of Lenti-*sgNf1*-*sgRasa1*-*sgPten*/Cre. sgRNA targeted regions were PCR amplified, and knockout scores, representing the proportion of cells that have either a frameshift-inducing indel or a large indel in a protein-coding region, were calculated using Synthego's ICE.

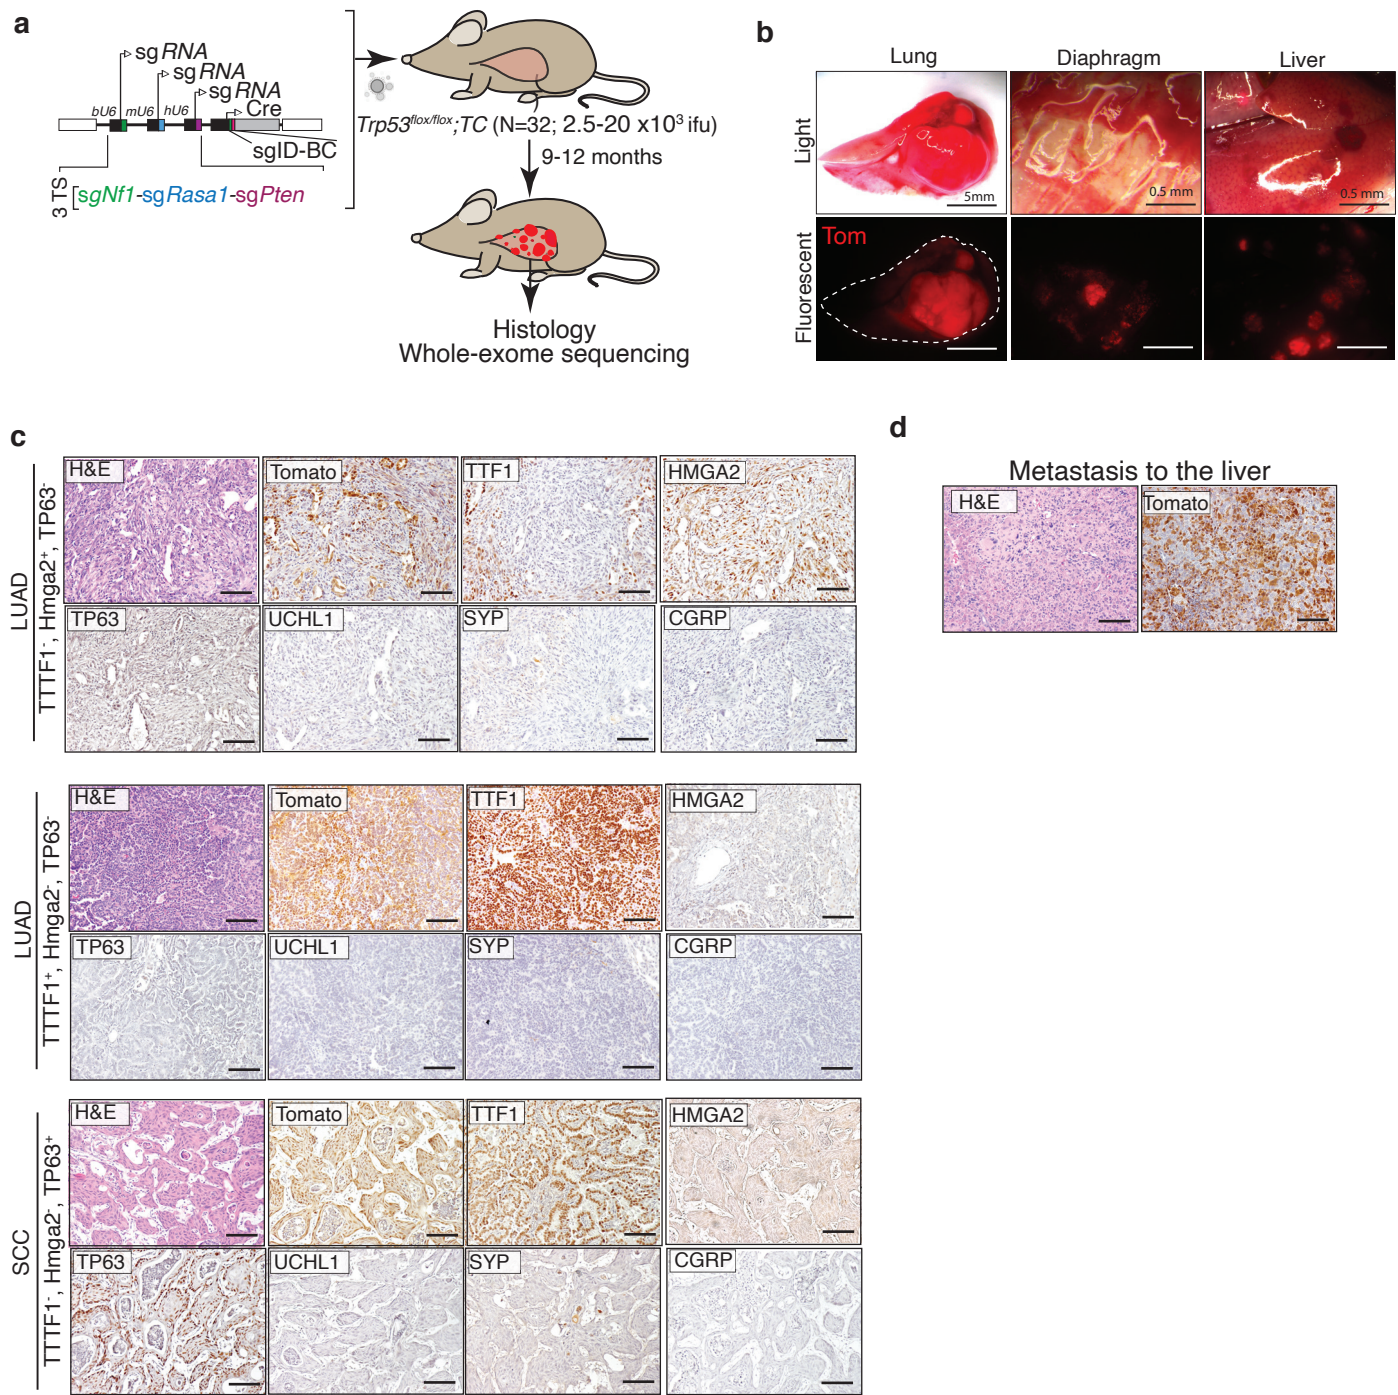

**Figure S12. Inactivation of *Nf1*, *Rasa1*, and *Pten* generates lung tumors with the ability to metastasize to other organs.**

**a.** Schematic of inactivation of *Nf1*, *Rasa1*, and *Pten* in *Trp53<sup>flox/flox</sup>;TC* mice using the *Lenti-sgNf1-sgRasa1-sgPten/Cre* vector. Mouse genotype, mouse number, and titer of virus delivered mice are indicated. ifu, infection unit

**b.** Bright-field and fluorescence images of lungs, diaphragm, and liver from the *Trp53<sup>flox/flox</sup>;TC* mice 12 months after tumor initiation with *Lenti-sgNf1-sgRasa1-sgPten/Cre* virus. Lung lobes are outlined with a dashed white line. Scale bars=5 and 0.5 mm (4 out of 32 mice had obvious metastasis).

**c.** Representative H&E, Tomato, TTF1, HMGA2, TP63, UCHL1, SYNAPTOPHYSIN (SYP), and CGRP-stained tumor sections from *Trp53<sup>flox/flox</sup>;TC* mice 9-12 months after transduction with *Lenti-sgNf1-sgRasa1-sgPten/Cre*. Scale bars= 100  $\mu$ m.

**d.** H&E and tdTomato staining of liver sections from one of the *Trp53<sup>flox/flox</sup>;TC* mice with metastasis. Scale bars= 100  $\mu$ m.



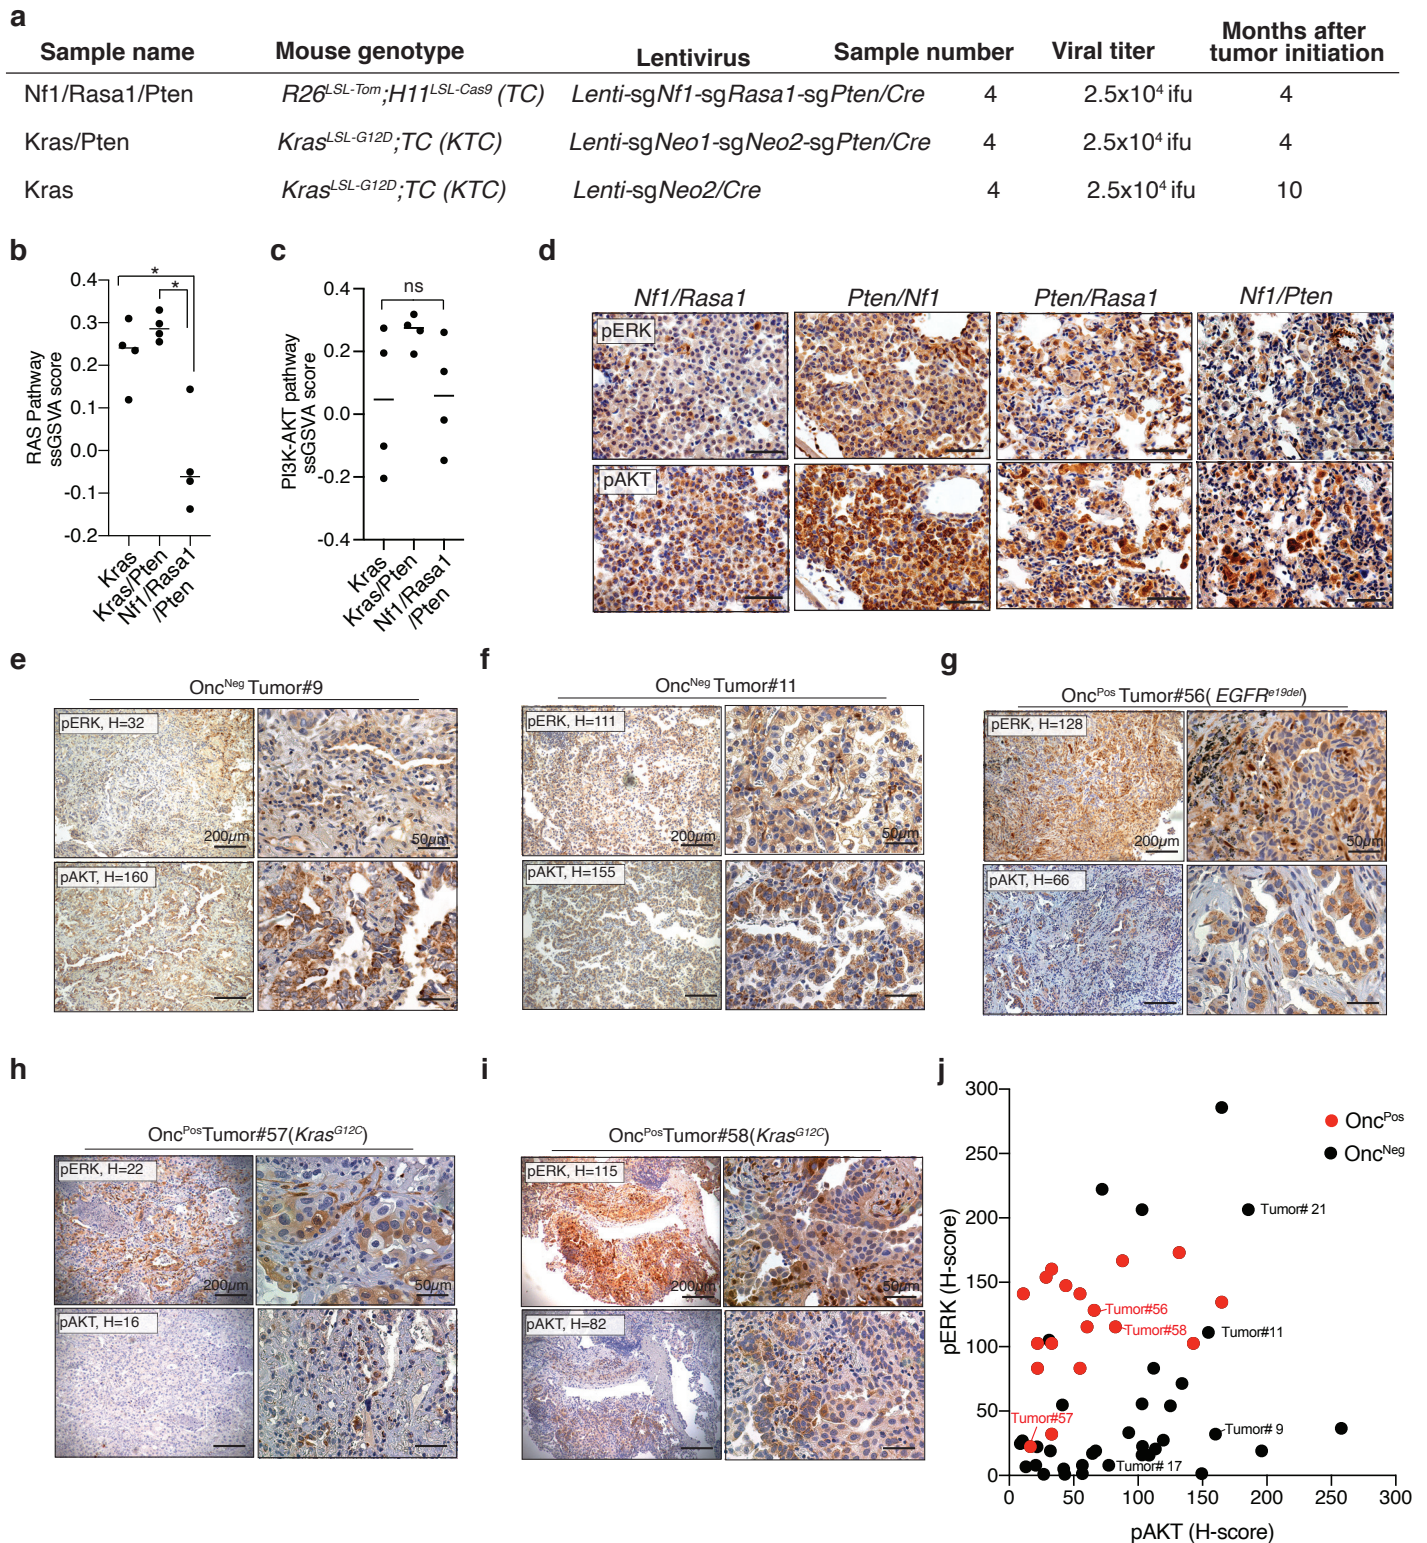

**Figure S13. Onc-negative RAS/PI3K subtype of lung adenocarcinomas activate RAS and PI3K pathways biochemically.**

**a.** Summary of the mouse tumors sorted using FACS and analyzed by RNA-sequencing and immunohistochemistry.

**b,c.** RAS and PI3K-AKT pathway gene-set profiles estimated by single-sample Gene Set Enrichment Analysis (ssGSVA). Tumors from *Kras<sup>G12D</sup>;TC (KTC+sgInert and KTC+sgPten)* mice are compared with *Nf1*, *Rasa1*, and *Pten* mutant tumors (*Nf1/Rasa1/Pten*). The bar is the mean. ns: non-significant, \**p*<0.05 using Mann-Whitney U test.

**d.** Representative immunohistochemistry for pERK and pAKT to determine activation of RAS and PI3K pathway in tumors with the indicated genotypes. The first gene is mutated using floxed alleles, and the second gene is inactivated using sgRNA/Cas9 (see **Figure S8** for more details). Scale bar = 50 μm

**e-i.** Representative pAKT and pERK-stained sections of tumors from human oncogene-negative and oncogene-positive tumors. H-score for the whole section is indicated on each representative image. Scale bar= 200 μM (right), 50 μm (left)

**j.** Replotting of pAKT and pERK staining on 35 oncogene-negative and 18 oncogene-positive human lung adenocarcinomas (**Figure 4f, g**). The tumors shown as IHC examples in **Figure 4d,e**, and **S14e-i** are labeled on this plot.

Yousefi, Boross *et al.*

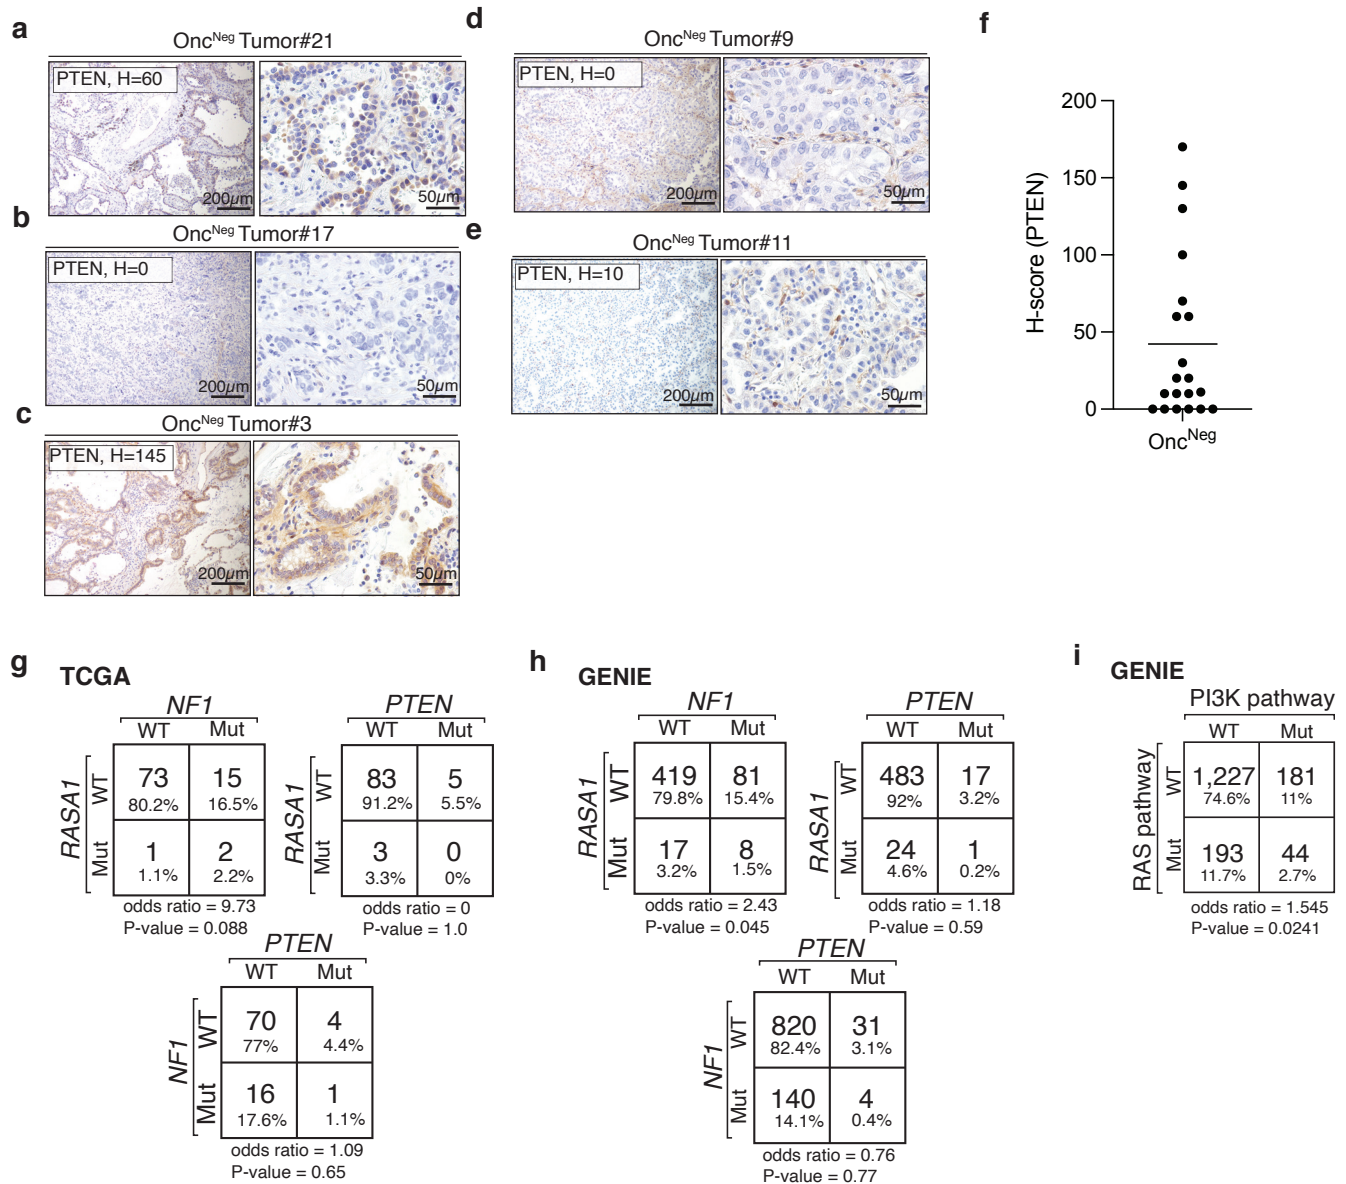

**Figure S14. Alterations in RAS and PI3K pathways are enriched in Onc-negative <sup>RAS/PI3K</sup> subtype of human lung adenocarcinomas.**

**a-e.** Representative PTEN-stained sections of oncogene-negative human tumors. H-score for the whole section is indicated for each representative image. Scale bar= 200  $\mu$ M (right), 50  $\mu$ m (left)

**f.** PTEN H-scores for oncogene-negative human lung adenocarcinoma tumors.

**g, h.** Alteration frequencies of *NF1*, *RASA1*, and *PTEN* (point mutation, CNV, and indel) and assessment of their co-occurrences, the p-values were calculated by two-sided Fisher's Exact Test. 91 oncogene-negative tumors were from the TCGA datasets. 525, 995, and 525 tumors were analyzed for *RASA1/PTEN*, *NF1/PTEN*, and *RASA1/NF1* alterations from the GENIE dataset.

**i.** Frequency of alteration of well-established components of RAS and PI3K pathways (Table S6) queried in GENIE data set and their co-occurrences, the p-value calculated by two-sided Fisher's Exact Test.



Yousefi, Boross *et al.*

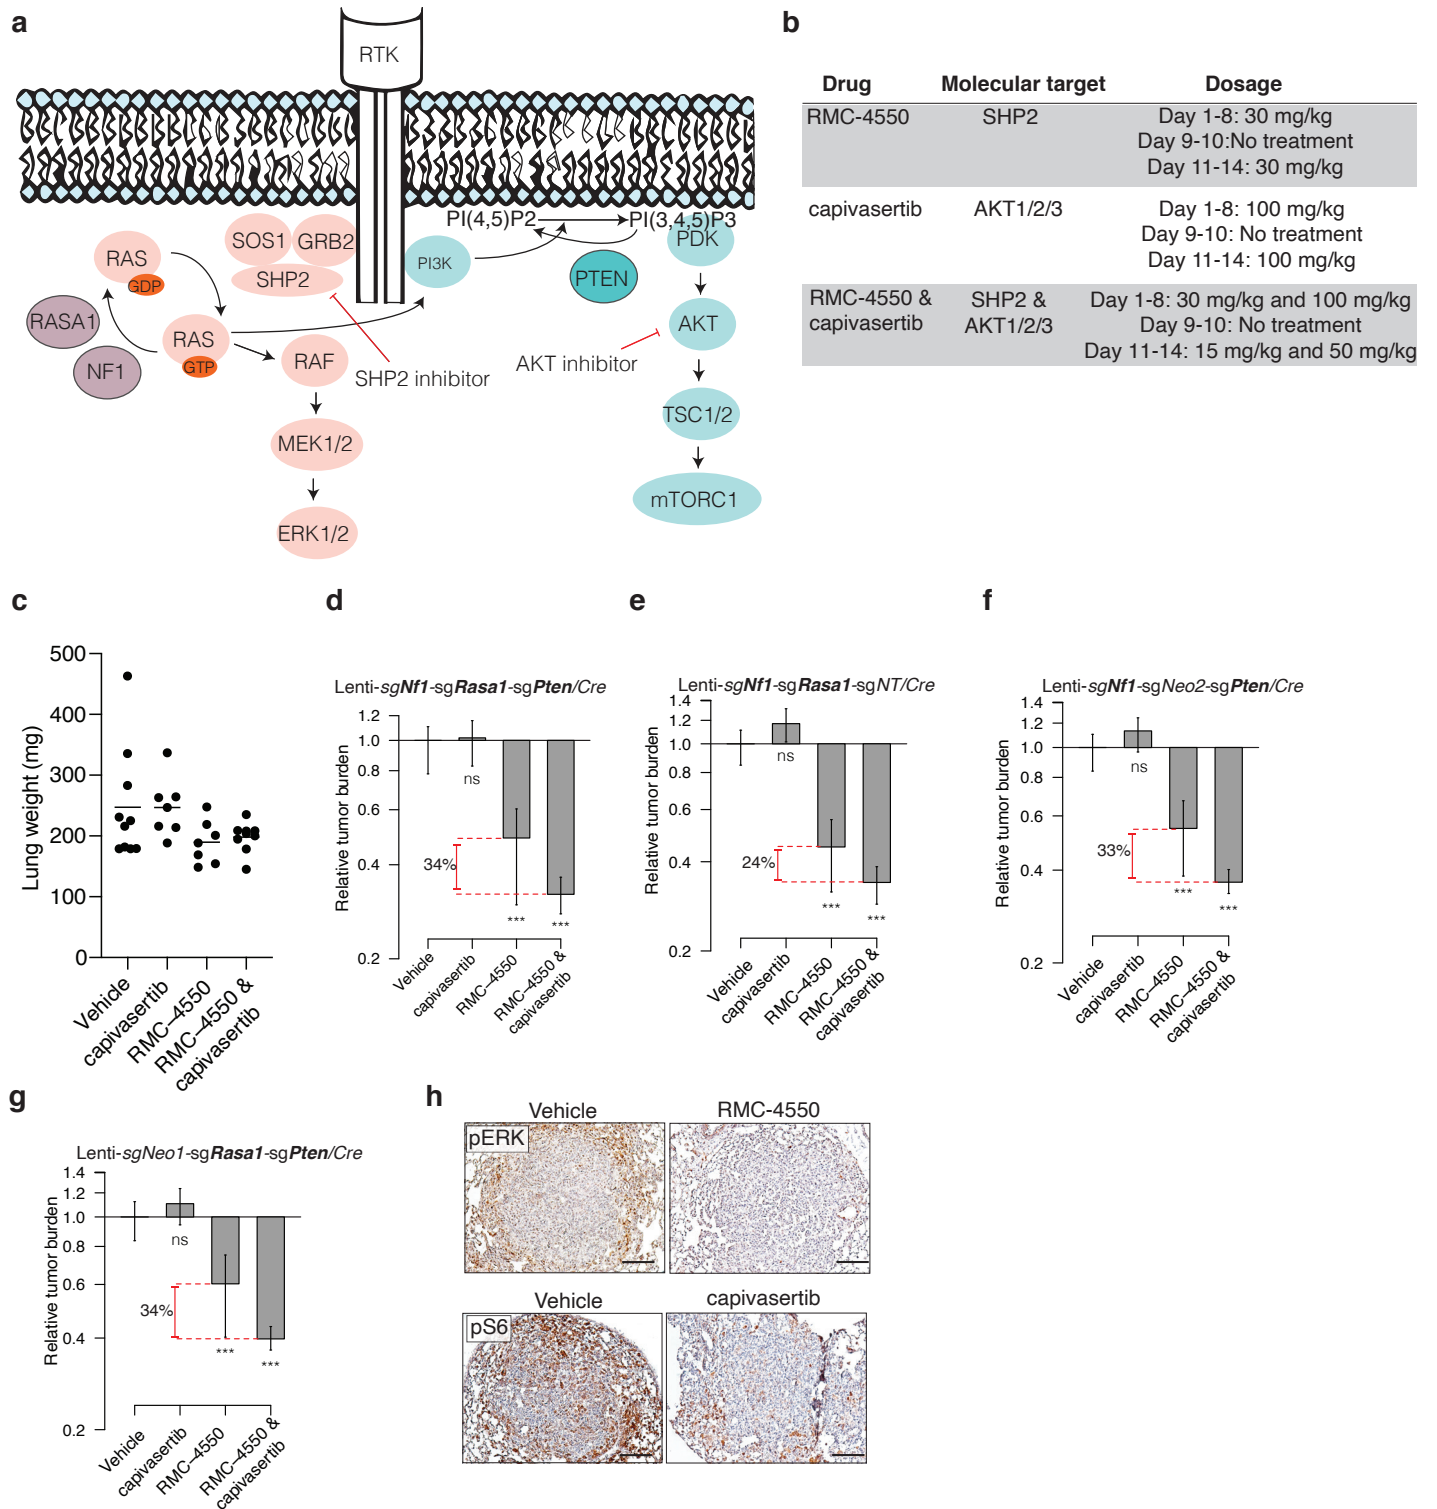

**Figure S15. *Nf1*, *Rasa1*, and *Pten* mutant oncogene-negative lung tumors respond to inhibition of PI3K and RAS pathways.**

**a.** RAS and PI3K pathways are activated by alterations of *Nf1*, *Rasa1*, and *Pten* and targeted by SHP2 and AKT inhibitors.

**b.** Drugs used to inhibit RAS and PI3K pathways *in vivo* and their dosages.

**c.** Lung weight of mice described in **Figure 5a-b**.

**d-g.** Relative tumor burden in mice after treatment with capivasertib, RMC-4550, and combination of these two drugs compared with tumor burden in vehicle-treated mice. ns: non-significant, \*\*\* $p < 0.001$ . Drug response is shown for tumors driven by inactivation of different combinations of *Nf1*, *Rasa1*, and *Pten*.

**h.** Representative pERK and pS6-stained sections of oncogene-negative<sup>RAS/PI3K</sup> tumors from *TC* mice described in **S16** after treatment with the indicated drugs. The mice were injected with one last dose of indicated drugs 4 hours before tissue harvest. Scale bars= 100  $\mu$ m

Yousefi, Boross *et al.*

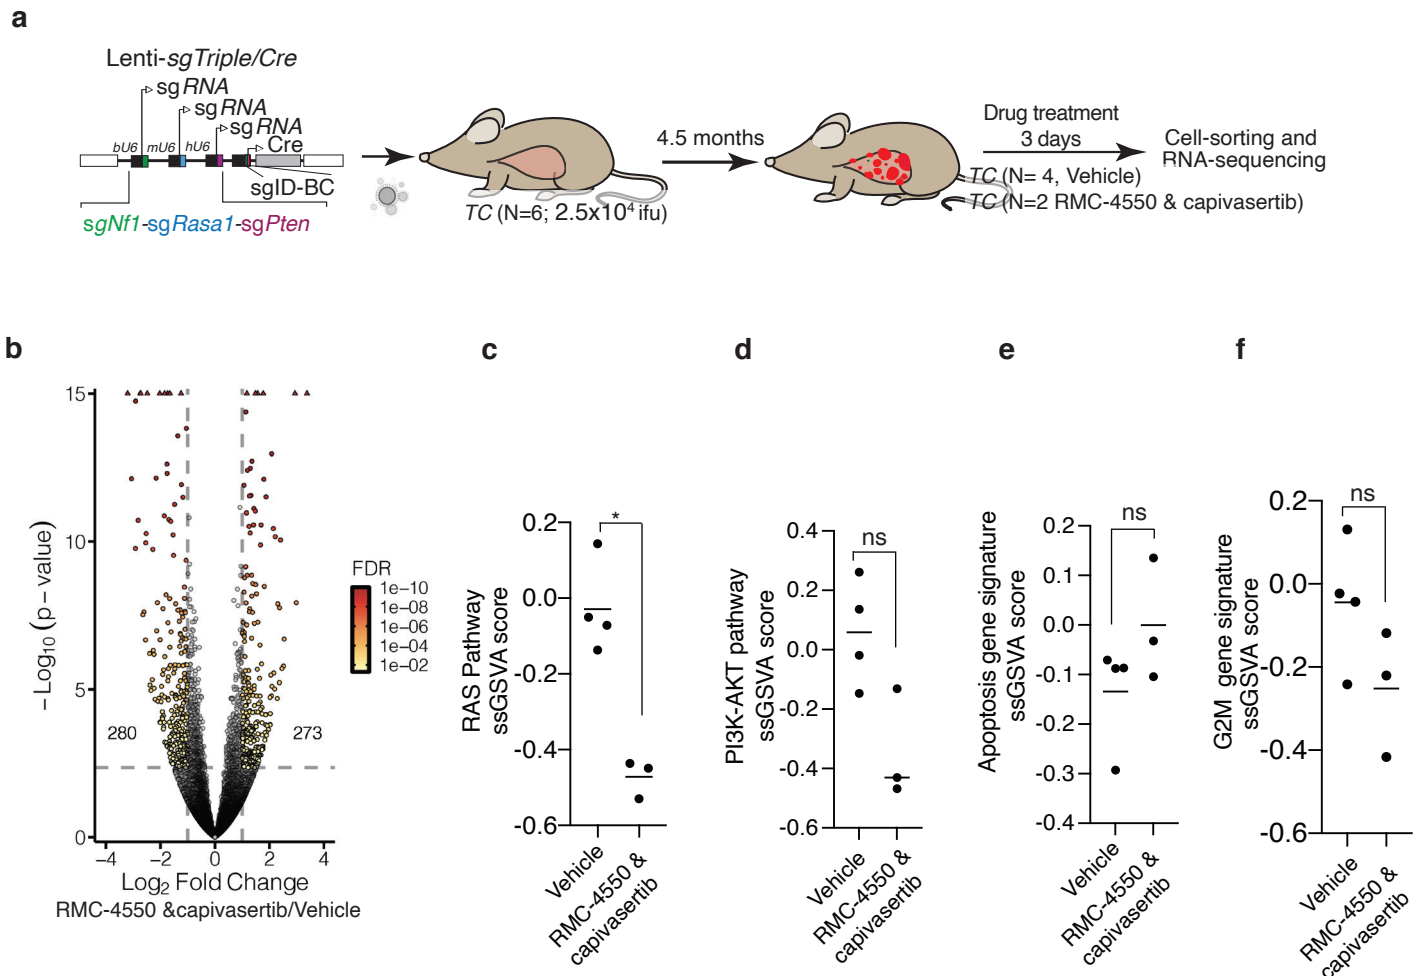

**Figure S16. RMC-4550 and capivasertib treatment induces apoptosis gene signature and suppresses G2M gene signature in Onc-negative<sup>RAS/PI3K</sup> tumors.**

**a.** Generation of Onc-negative<sup>RAS/PI3K</sup> tumors in TC mice to determine gene expression changes to pharmacological inhibition of RAS and PI3K pathways. Indicated number of mice were treated with vehicle or combination of RMC-4550 and capivasertib 4.5 months after tumor initiation for three days. RNA-sequencing was performed on sorted Tomato<sup>positive</sup> epithelial cells in tumors.

**b.** Volcano plots depicting a global overview of differential gene expression in Onc-negative<sup>RAS/PI3K</sup> tumors in the absence and presence of treatment with RMC-4550 and capivasertib for three days as described above. Significant differential expression is defined as an absolute log<sub>2</sub>(Fold Change) > 1 and FDR < 0.01. The numbers of significantly differentially expressed genes are indicated on the plot.

**c-f.** Comparison of RAS, PI3K-AKT, apoptosis, and G2M gene-set profiles estimated by single-sample Gene Set Enrichment Analysis (ssGSVA) in mouse Onc-negative<sup>RAS/PI3K</sup> tumors after treatment with vehicle or RMC-4550 and capivasertib for three days. Each dot represents one tumor. ssGSVA data points shown for vehicle-treated tumors are the same as **Figure 13b, c** as Nf1/Rasa1/Pten. The bar is mean. ns: non-significant, \*p<0.05 using Mann-Whitney U test.

Yousefi, Boross et al.

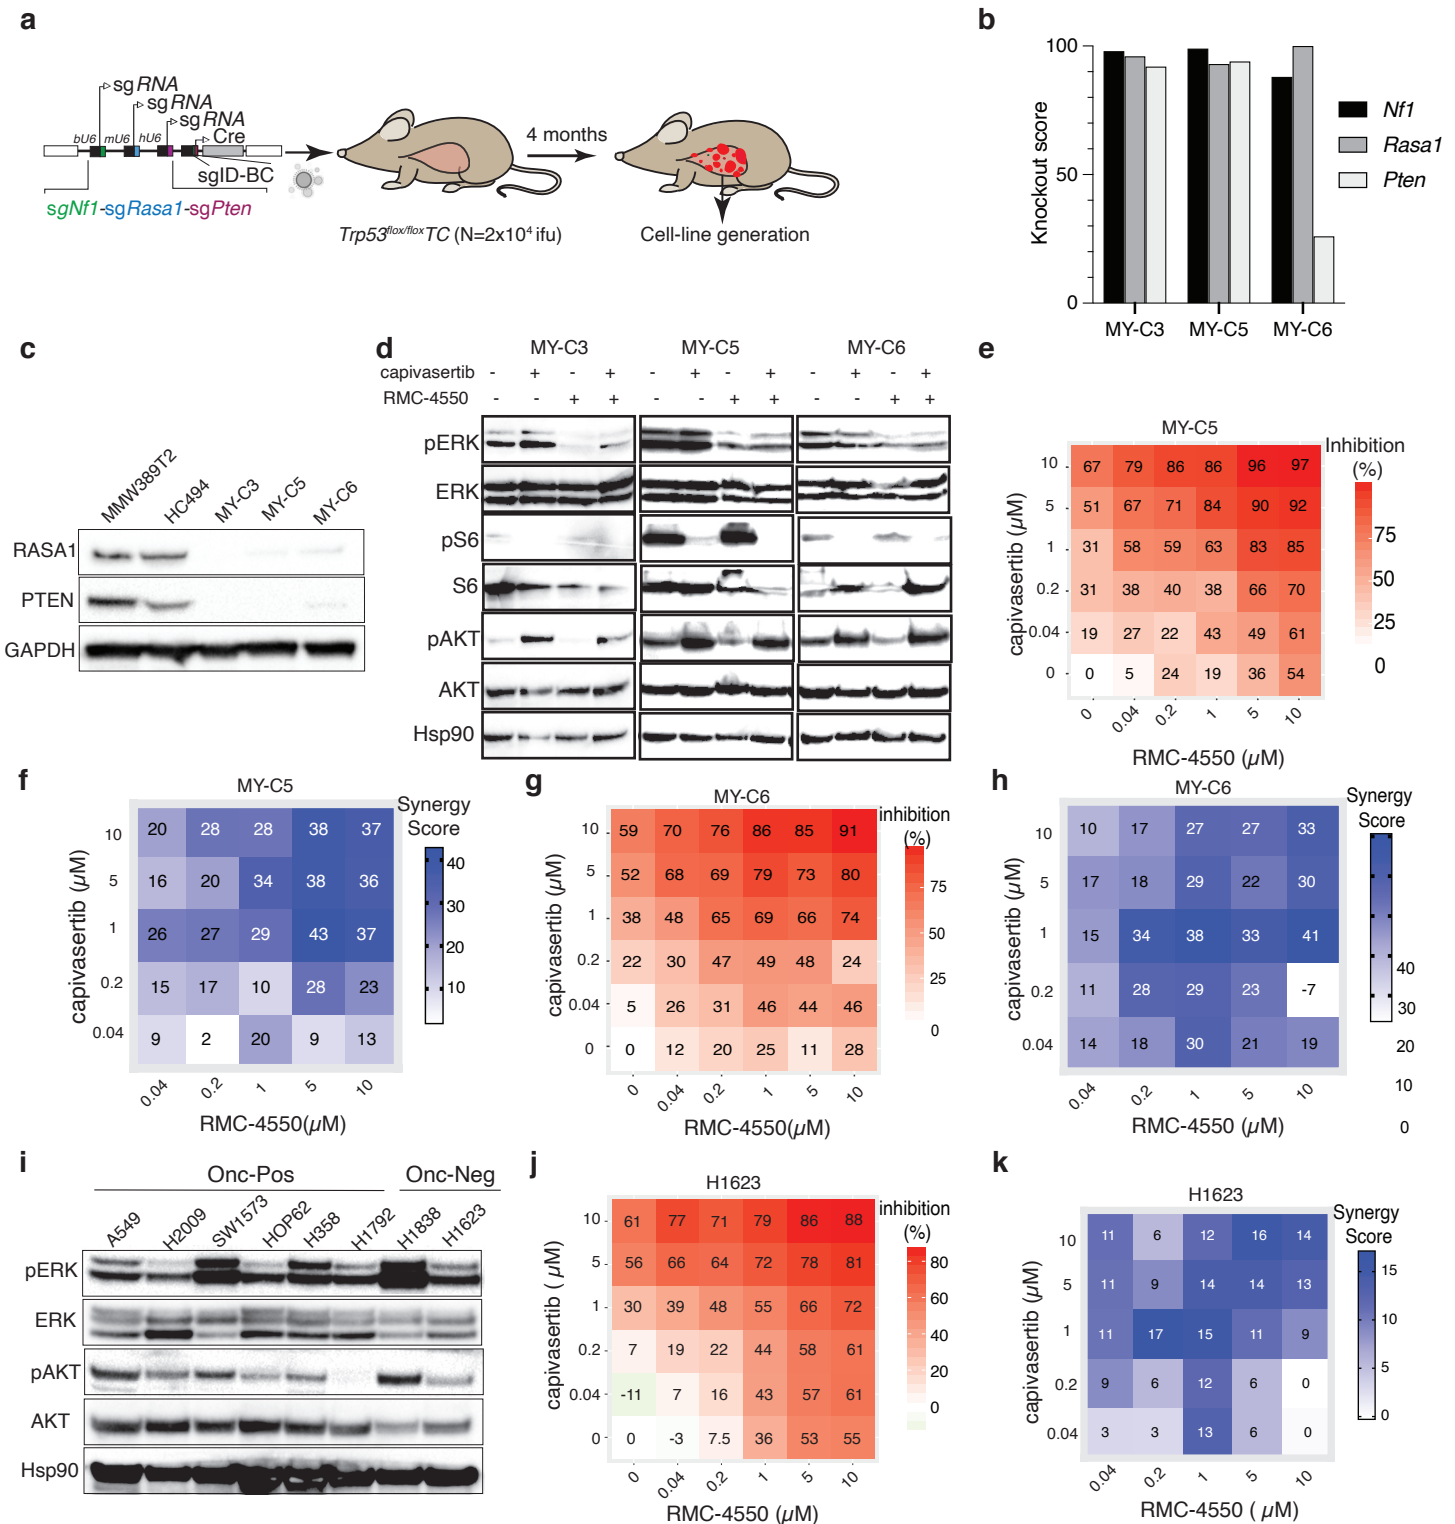

**Figure S17. RMC-4550 synergizes with capivasertib to inhibit proliferation and induce cell death in Onc-negative<sup>RAS/PI3K</sup> lung adenocarcinoma cell lines.**

**a.** Cell line generation from Onc-negative<sup>RAS/PI3K</sup> tumors developed in *Trp53<sup>flox/flox</sup>;TC* mice.

**b.** Indel analysis of 3 distinct mouse oncogene-negative<sup>RAS/PI3K</sup> cell lines described above. Regions targeted by *sgNf1*, *sgRasa1*, and *sgPten* were PCR amplified and analyzed using Synthego ICE after sanger sequencing. Knockout score represents indels causing frameshift mutations.

**c.** Immunoblot of 2 murine oncogene-positive cell lines (MMW398T2 and HC494: *Kras<sup>G12D</sup>* and *Trp53* mutant and *Nf1*, *Rasa1*, and *Pten* wild type) and 3 murine Onc-negative<sup>RAS/PI3K</sup> mouse cell lines (described above) to assess loss of RASA1 and PTEN in oncogene-negative cell lines.

**d.** Immunoblot of 3 distinct oncogene-negative cell-lines treated with 10uM of indicated drugs for 24 hours.

**e.g.** Drug dose-response matrix depicting % growth inhibition after treatment with various doses of RMC-4550 and capivasertib indicated on the plots. The cell-line used for the generation of each matrix is noted on top of each heatmap.

**f,h.** Loewe's synergy score was calculated for each drug dose combination shown in **e** and **g**. Synergy score indicates the percentage of inhibition beyond what is expected if there is no interaction between the drugs.

**i.** Immunoblot of 6 human oncogene-positive and 2 human oncogene-negative cell lines for markers of RAS and PI3K pathway activation.

**j.** Drug dose-response matrix depicting % growth inhibition of H1623 human Onc-negative<sup>RAS/PI3K</sup> cell line.

**k.** Loewe's synergy score calculated based on drug responses in **Figure S17j**.

## 1 **METHODS**

2

### 3 **Analysis of human lung adenocarcinoma datasets**

4 Somatic mutation data (SNPs and indels, including silent mutations) for 513 TCGA lung  
5 adenocarcinoma (LUAD) tumors were downloaded from the UCSC Xena Browser  
6 (<http://xena.ucsc.edu/>) (Link 1 below). TCGA-LUAD clinical and exposure data were  
7 downloaded from the GDC Data Portal (<https://portal.gdc.cancer.gov/projects/TCGA-LUAD>)  
8 and the UCSC Xena Browser (Link 2 below). GISTIC2 thresholded copy number variation  
9 (CNV) data were downloaded from the UCSC Xena Browser (Link 3 below). Amplifications  
10 were defined as “2” and deletions as “-2”. Genes with conflicting CNV values within a single  
11 tumor were ignored. Fusion data were obtained from <sup>1</sup>. Fusion and CNV data were filtered to  
12 include only data from the 513 samples within the somatic mutation set. Duplicate fusions were  
13 collapsed into single fusions. MET-exon skipping data were taken from <sup>2</sup>. Curated survival data  
14 from <sup>3</sup> were downloaded from the UCSC Xena Browser (Link 4 below).

15 Links:

- 16 1. [https://tcga.xenahubs.net/download/mc3/LUAD\\_mc3.txt.gz](https://tcga.xenahubs.net/download/mc3/LUAD_mc3.txt.gz)
- 17 2. [https://tcga.xenahubs.net/download/TCGA.LUAD.sampleMap/LUAD\\_clinicalMatrix](https://tcga.xenahubs.net/download/TCGA.LUAD.sampleMap/LUAD_clinicalMatrix)
- 18 3. [https://tcga.xenahubs.net/download/TCGA.LUAD.sampleMap/Gistic2\\_CopyNumber\\_Gi](https://tcga.xenahubs.net/download/TCGA.LUAD.sampleMap/Gistic2_CopyNumber_Gi)  
19 [stic2\\_all\\_thresholded.by\\_genes.gz](https://tcga.xenahubs.net/download/TCGA.LUAD.sampleMap/Gistic2_CopyNumber_Gistic2_all_thresholded.by_genes.gz)
- 20 4. [https://tcga.xenahubs.net/download/survival/LUAD\\_survival.txt.gz](https://tcga.xenahubs.net/download/survival/LUAD_survival.txt.gz)

21 Data from AACR Project GENIE (hereinafter referred to as GENIE) v8 were downloaded  
22 from <https://www.synapse.org/#!Synapse:syn22228642> <sup>3</sup>, specifically: somatic mutations, copy  
23 number alteration (CNA) data, fusion data, panel information (genomic\_information.txt), and

24 clinical data (both sample- and patient-level). All data were filtered to only include LUAD  
25 tumors. A single tumor was kept for patients with multiple different tumor samples, with priority  
26 for earlier sequenced samples and those from primary tumors. If tumor samples appeared  
27 identical within the clinical meta-data, the related patient data were excluded.

28

## 29 **Determination of oncogenes**

30 To have a conservative estimate of the fraction of lung adenocarcinomas without known  
31 oncogenic drivers (oncogene-negative tumors), we generated a list of oncogenes that included  
32 any gene that met at least one of these criteria: 1) Genes that have hotspot mutations or specific  
33 alterations where cancers or cancer cells with that mutation respond to therapies targeted to the  
34 protein product of that mutant gene in patients, 2) The particular alteration in that gene can  
35 generate lung adenocarcinoma in genetically-engineered mouse models, 3) The altered gene can  
36 generate tumors in other tissues in genetically-engineered mouse models, and 4) Alteration of the  
37 indicated gene can lead to the transformation of cells or predicts response to targeted therapies *in*  
38 *vitro*. Additionally, we excluded genes if their supposed oncogenic alterations co-occur with  
39 alterations in other proto-oncogenes (listed below) in more than 50% of cases.

40

| Gene        | Oncogenic alterations              | Patients respond to oncogene inhibition | Sufficient to generate lung tumors in GEMMs | Oncogene in GEMMs of other tumor types | Cellular transformation and/or drug response in cultured cells | Co-occurring with other proto-oncogenes listed here |
|-------------|------------------------------------|-----------------------------------------|---------------------------------------------|----------------------------------------|----------------------------------------------------------------|-----------------------------------------------------|
| <i>KRAS</i> | Mutations at codons 12,13, and 61  | 4, 5                                    | 6-8                                         | 7, 9, 10                               |                                                                | 4%                                                  |
| <i>EGFR</i> | Diverse mutations and deletions    | 11, 12                                  | 13-15                                       | 16                                     |                                                                | 9%                                                  |
| <i>BRAF</i> | Diverse mutations and fusions      | 17                                      | 18, 19                                      | 20, 21                                 | 22                                                             | 18%                                                 |
| <i>HRAS</i> | Mutations at codons 12, 13, and 61 |                                         |                                             | 23                                     | 24, 25                                                         | 13%                                                 |

|               |                                         |        |                                     |        |           |     |
|---------------|-----------------------------------------|--------|-------------------------------------|--------|-----------|-----|
| <i>NRAS</i>   | Mutations at codons 12, 13, and 61      |        |                                     | 26, 27 |           | 14% |
| <i>MET</i>    | Exon skipping                           | 28, 29 | 2                                   |        | 2, 30, 31 | 47% |
| <i>MEK1</i>   | Diverse mutations                       |        |                                     |        | 32        | 24% |
| <i>SOS1</i>   | Diverse mutations                       |        |                                     |        | 33        | 17% |
| <i>ALK</i>    | Translocations/fusions                  | 34     | 35, 36                              | 37     | 38        | 2%  |
| <i>RET</i>    | Translocations/fusions                  | 39     | 40, 41                              |        |           | 10% |
| <i>ROS1</i>   | Translocations/fusions                  | 42     |                                     | 43, 44 |           | 4%  |
| <i>NTRK1</i>  | Translocations/fusions                  | 45     |                                     |        | 46        | 29% |
| <i>NRG1</i>   | Translocations/fusions                  | 47     |                                     |        |           | 0%  |
| <i>AKT1</i>   | Point mutation (E17K)                   | 48     |                                     |        | 49        | 50% |
| <i>RIT1</i>   | Diverse mutations                       |        |                                     |        | 50        | 33% |
| <i>ERBB2</i>  | Amplification, point mutation, deletion | 51     | 52, 53                              | 54, 55 | 56        | 19% |
| <i>PIK3CA</i> | Diverse mutations                       |        | Opposing evidence <sup>57, 58</sup> |        |           | 68% |

41

## 42 **Classification of mutations and tumors**

43 Mutations (somatic mutations, fusions, CNVs, and MET exon skipping [TCGA only])  
44 were classified as within proto-oncogenes (described above) or not. Mutations within these  
45 proto-oncogenes were classified as “accepted oncogenic” mutations if those alterations met at  
46 least one of the criteria described above. Any tumor with one accepted oncogenic alteration was  
47 classified as “*oncogene-positive*”. Tumors with accepted oncogenic mutations in more than one  
48 gene were classified as “multiple oncogenes mutated”. Any tumor with alterations in a proto-  
49 oncogene that was not considered an accepted oncogenic alteration based on the four criteria  
50 above was classified as “*oncogene-indeterminate*”. Thus, these tumors contain variants of  
51 unknown significance (VUS) in proto-oncogenes<sup>59</sup>. The remaining tumors, without any  
52 mutations in any proto-oncogene, were classified as “*oncogene-negative*”.

53 Tumor type counts per database:

|                        | TCGA | GENIE |
|------------------------|------|-------|
| Total                  | 513  | 9,099 |
| Oncogene-negative      | 91   | 1,645 |
| Oncogene-positive      | 283  | 6,041 |
| Oncogene-indeterminant | 139  | 1,413 |

54



55 Oncogene-positive tumors were further classified by the type of oncogenic mutation they  
56 had (**Figure 1a** and **S1a**).

57

### 58 **Clinical characteristics**

59 We divided patients into males or females based on the sex reported by either TCGA or  
60 GENIE, if provided. For TCGA, the arithmetic mean for age at diagnosis was computed and  
61 reported with a standard error of the mean (SEM). Non-smokers were defined as having tobacco  
62 smoking history values of 1 (see public ID 2181650 at <https://cdebrowser.nci.nih.gov>), while  
63 smokers were defined as anything > 1 (current or reformed smokers). The arithmetic mean pack-  
64 years smoked for smokers, if reported, was described, along with SEM.

65

### 66 **Pan-cancer tumor suppressor genes**

67 We generated a list of tumor suppressor genes based on two previously published reports  
68 to compare the number of altered tumor suppressor genes in oncogene-negative tumors with  
69 oncogene-positive and oncogene-indeterminate tumors<sup>60, 61</sup>. We manually removed genes with  
70 conflicting evidence as a tumor suppressor gene in LUAD. The final list of TSGs is in **Table S1**.

71

### 72 **Calculation of mutation frequencies and absolute number of genes mutated**

73 In general, mutation frequencies for a given gene were calculated as the number of  
74 tumors with that gene mutated, divided by the number of tumors screened for mutations in that  
75 gene (for TCGA: all tumors were screened for all genes, for GENIE: the panel sequencing  
76 information was obtained from genomic\_information.txt to determine which tumors were  
77 screened for which genes). Mutation frequencies were calculated for point mutations (PM),

78 insertion/deletions (indels), and deletions separately. Additionally, the frequency for a  
79 combination of PMs, indels, and deletions was also calculated. The screened set of tumors in  
80 GENIE for the latter included only those tumors which were screened for both PMs/indels as  
81 well as CNVs for each gene. Reported in **Figure S2b** are oncogene-negative tumors with either  
82 point mutations, indels, or deletions in the indicated gene. In **Figure S2c-d**, for each gene, a ratio  
83 of enrichment of mutations in oncogene-negative over oncogene-positive tumors was calculated  
84 as:

$$85 \frac{\text{mutation frequency}_{\text{oncogene-negative}}}{\text{mutation frequency}_{\text{oncogene-positive}}}$$

86

87 The  $p$ -values for enrichments were calculated using the two-sided Fisher's Exact test as  
88 implemented by SciPy. For a given set of genes with at least a single tumor screened, the false  
89 discovery rate (FDR) was calculated using the Benjamini-Hochberg method on the Fisher's  
90 Exact  $P$ -values.

91 To measure the total number of genes mutated (**Figure S1d**), a gene was considered  
92 mutated if it had at least one point mutation or indel. All these mutations in a tumor were  
93 collated, and the number of the unique set of genes was counted as the total number of genes  
94 mutated. For counting the number of individual tumor suppressors mutated (**Figure S1e**),  
95 deletions were also included, and the list of pan-cancer tumor suppressors as defined above was  
96 used. The Mann-Whitney U test was conducted on the number of respective genes mutated in  
97 either oncogene-negative or oncogene-positive tumors.

98

99 **Survival Analysis**

100 Survival data from <sup>3</sup> were obtained as described above. Kaplan-Meier analysis was  
101 performed to estimate probability curves for overall survival (OS) and disease-specific survival  
102 (DSS). The logrank test was used to compare oncogene-negative and oncogene-positive tumors.

103

#### 104 **Gene and pathway alteration co-occurrences**

105 For analysis of simultaneous pairwise alterations of *NFI*, *RASAI*, or *PTEN* within  
106 oncogene-negative tumors, we determined the number of tumors with no mutation in *NFI*,  
107 *RASAI*, or *PTEN*, with mutation(s) in one gene, or mutations in two genes. Point mutations,  
108 indels, and deletions in each gene were included. A tumor needed to have one or more mutations  
109 in that gene to be considered mutated. For GENIE, only those tumors screened for both genes for  
110 point mutations and indels (according to the panel information file) were investigated. For  
111 TCGA, all oncogene-negative tumors were considered. A one-sided Fisher's exact test was  
112 conducted to determine if there were more than the expected number of tumors with both genes  
113 mutated.

114 Gene lists and their acceptable alterations (*i.e.*, not known to be an oncogene alteration)  
115 were generated as being in RAS or PI3K pathways <sup>60-80</sup> (**Table S6**). We determined the list of all  
116 tumors screened for each gene in each pathway for the respective type of mutation (point  
117 mutation/indel, amplification, deletion, or fusion). For each alteration within each pathway, we  
118 determined whether it could activate the corresponding pathway or not according to the above  
119 list. A gene was considered mutated if it had at least one accepted mutation within it. A tumor  
120 was considered mutated in a given pathway if it had at least one gene mutated in that pathway.

121

#### 122 **Animal Studies**

123 The use of mice for the current study has been approved by Institutional Animal Care and  
124 Use Committee at Stanford University, protocol number 26696. *Kras*<sup>LSL-G12D/+</sup> (Jax # 008179  
125 (K)), *R26*<sup>LSL-tdTomato(ai9)</sup> (Jax # 007909 (T)), and *H11*<sup>LSL-Cas9</sup> (Jax # 026816 (C)), *Keap1*<sup>flox</sup>, *Pten*  
126 <sup>flox</sup> (Jax # 006440), *Lkb1*<sup>flox</sup> (Jax # 014143), *Nf1*<sup>flox</sup> (Jax # 017640), and *Trp53*<sup>flox</sup> (Jax # 008462)  
127 mice have been previously described<sup>6, 81-87</sup>. All mice were on a C57BL/6:129 mixed background  
128 except the mice used for derivation of oncogene-negative *Nf1*, *Rasa1*, *Pten*, and *Trp53* mutant  
129 cell-lines, and some of the *Trp53*<sup>flox/flox</sup>;TC mice that were used for metastasis analysis (**Figure**  
130 **S12a**), which were on a pure C57BL/6 background.

131

### 132 **Tumor initiation and selection of Lenti-sgRNA/Cre pools**

133 Tumors were initiated by intratracheal delivery of pooled or individual Lenti-sgRNA/Cre  
134 vectors. Barcoded Lenti-sgRNA/Cre vectors within each viral pool are indicated in each figure.  
135 Tumors were initiated with the indicated titers and allowed to develop tumors for between 3 and  
136 12 months after viral delivery, as indicated in each figure.

137 In **Figure 1** and **Figure S3**, we transduced *Nf1*<sup>ff</sup>;TC, *Pten*<sup>ff</sup>;TC, *Trp53*<sup>ff</sup>;TC, *Lkb1*<sup>ff</sup>;TC,  
138 *Keap1*<sup>ff</sup>;TC, TC, and T mice with two pre-existing pools of barcoded Lenti-sgRNA/Cre vectors  
139 that target ~50 putative tumor suppressor genes. These two pools have been previously used to  
140 studied the effect of these putative tumor suppressor genes in KRAS<sup>G12D</sup>-driven lung tumors  
141 (Lenti-sgTS15/Cre<sup>88, 89</sup> and Lenti-sgTS102/Cre<sup>90</sup>).

142 Lenti-sgTS15/Cre contained vectors targeting 11 tumor suppressors with one sgRNA per  
143 gene in addition to four inert sgRNAs (Lenti-sgTS15/Cre)<sup>88, 89</sup>. Lenti-sgTS102/Cre included  
144 vectors targeting 48 tumor suppressors, including all five of the “core” tumor suppressors and

145 most of the tumor suppressors targeted in Lenti-sg*TS15/Cre* with two or three sgRNAs per gene  
146 in addition to five inert sgRNAs (102 sgRNA in total, Lenti-sg*TS102/Cre*)<sup>90</sup> (See **Table S1**).

147 We determined the alteration frequency of many putative tumor suppressor genes,  
148 including those targeted using our Lenti-sg*TS15/Cre* and Lenti-sg*TS102/Cre* pools, in oncogene-  
149 positive and oncogene-negative tumors from TCGA and GENIE<sup>60,61</sup>. Alterations in only 17  
150 tumor suppressor genes were significantly enriched in oncogene-negative tumors in GENIE and  
151 most (12/17) were targeted by the Lenti-sg*TS15/Cre* and Lenti-sg*TS102/Cre* pools (**Table S1**).

152 We previously found that a small percent of lung tumors initiated with Lenti-sgRNA/*Cre*  
153 vectors in other lung cancer models contained multiple sgRNAs, consistent with the transduction  
154 of the initial cell with multiple Lenti-sgRNA/*Cre* vectors<sup>88,89</sup>. Thus, from tumor suppressor  
155 genes that were found to be mutated in the largest tumors and expansions of experiment in  
156 **Figure 1**, we selected 7 tumor suppressor genes that showed up in *Nf1<sup>ff</sup>;TC*, *Pten<sup>ff</sup>;TC*,  
157 *Trp53<sup>ff</sup>;TC* mice in addition to 6 other tumor suppressor genes that showed significant effect in  
158 at least one of these three backgrounds. For Studies in **Figure 2** and **Figure S7**, we used higher  
159 titers of Lenti-sgRNA/*Cre* vectors to increase the potential of finding higher-order interactions  
160 that generate lung tumors. We found that simultaneous alterations of *Nf1*, *Rasa1*, and *Pten* was  
161 one of the most frequent co-occurring alterations in the largest tumors. Thus, we focused on  
162 studying these three tumor suppressor alterations using Lenti-sg*TripleTS8/Cre*, Lenti-  
163 sg*TripleTS6/Cre*, and Lenti-sg*Nf1-sgRasa1-sgPten/Cre* in the following figures.

164 The sgRNA sequences used in each experiment are summarized below. For a more  
165 detailed description see **Table S1**:

| Pool                     | Pool composition                        |
|--------------------------|-----------------------------------------|
| Lenti-sg <i>TS15/Cre</i> | The exact pool used in <sup>88,89</sup> |

|                       |                                                                                                                                                                              |
|-----------------------|------------------------------------------------------------------------------------------------------------------------------------------------------------------------------|
| Lenti-sgTS102/Cre     | The exact pool used in <sup>90</sup>                                                                                                                                         |
| Lenti-sgTS14/Cre      | Version 1 of sgEP300, sgKmt2c, sgNcoa6, sgRbm10, sgNeo, sgNfl, and sgPten, and version 2 of sgArid1a, sgCdkn2a, sgDnmt3a, sgKdm6a, sgRb1, sgTet2, sgRasa1 from <sup>90</sup> |
| Lenti-sgTS11/Cre      | Lenti-sgTS14/Cre pool excluding sgNfl, sgRasa1, and sgPten                                                                                                                   |
| Lenti-sgTripleTS8/Cre | Version 1 of sgNfl, sgNeo, and sgNT, and version 2 of sgRasa1, sgPten, and sgNeo from <sup>90</sup>                                                                          |
| Lenti-sgTripleTS6/Cre | Version 1 of sgNfl, sgNeo, and sgNT, and version 2 of sgRasa1, sgPten, and sgNeo from <sup>90</sup> . Vectors targeting only Nfl and only Rasa1 were removed from this pool. |

166

167

## 168 **Lentiviral generation, barcoding, and packaging**

169 The sgRNA sequences, cloning, and barcoding of Lenti-sgRNA/Cre and Lenti-  
170 TriplesgRNA/Cre vectors have been previously described <sup>88, 90, 91</sup>. To generate lentivirus, Lenti-  
171 sgRNA/Cre vectors were individually co-transfected into 293T cells with pCMV-VSV-G  
172 (Addgene #8454) envelope plasmid and pCMV-dR8.2 dvpr (Addgene #8455) packaging plasmid  
173 using polyethylenimine. Supernatants were collected 36 and 48 hours after transfection, passed  
174 through a 0.45µm syringe filter (Millipore SLHP033RB) to remove cells and cell debris,  
175 concentrated by ultracentrifugation (25,000 g for 1.5 hours at 4°C) and resuspended in PBS  
176 overnight. Each virus was titered against a standard of known titer using LSL-YFP Mouse



177 Embryonic Fibroblasts (MEFs) (a gift from Dr. Alejandro Sweet-Cordero/UCSF). All lentiviral  
178 vector aliquots were stored at -80°C and were thawed and pooled immediately prior to delivery  
179 to mice.

180

### 181 **Tumor barcode sequencing and analysis**

182 For DNA extraction from single dissected tumors to generate libraries for Tuba-seq,  
183 targeted sequencing of selected oncogenes, and whole-exome sequencing, we used Qiagen  
184 AllPrep DNA/RNA Micro kit. For Tuba-seq on bulk lungs, genomic DNA was isolated from  
185 bulk tumor-bearing lung tissue from each mouse as previously described<sup>88</sup>. Briefly, benchmark  
186 control cell lines were generated from LSL-YFP MEFs transduced by a barcoded Lenti-  
187 sgNT3/*Cre* vector (NT3: an inert sgRNA with a unique sgRNA identifying barcode (sgID) and a  
188 random barcode (BC)) and purified by sorting YFP<sup>+</sup> cells using BD FACS Aria™ II Cell Sorter.  
189 Three cell lines (100,000 to 500,000 cells each) were added to each mouse lung sample before  
190 lysis to enable the calculation of the absolute number of neoplastic cells in each tumor from the  
191 number of sgID-BC reads. Following homogenization and overnight protease K digestion,  
192 genomic DNA was extracted from the lung lysates using standard phenol-chloroform and ethanol  
193 precipitation methods. Subsequently, Q5 High-Fidelity 2x Master Mix (New England Biolabs,  
194 M0494X) was used to amplify the sgID-BC region from 50 ng of DNA from dissected tumors or  
195 32 µg of bulk lung genomic DNA. The unique dual-indexed primers used were Forward:  
196 AATGATACGGCGACCACCGAGATCTACAC- 8 nucleotides for i5 index-  
197 ACACTCTTTCCCTACACGACGCTCTTCCGATCT-6 to 9 random nucleotides for increasing  
198 the diversity-GCGCACGTCTGCCGCGCTG and Reverse:  
199 CAAGCAGAAGACGGCATAACGAGAT-6 nucleotides for i7 index-

200 GTGACTGGAGTTCAGACGTGTGCTCTTCCGATCT-9 to 6 random nucleotides for  
201 increasing the diversity-CAGGTTCTTGCGAACCTCAT. The PCR products were purified with  
202 Agencourt AMPure XP beads (Beckman Coulter, A63881) using a double size selection  
203 protocol. The concentration and quality of the purified libraries were determined using the  
204 Agilent High Sensitivity DNA kit (Agilent Technologies, 5067-4626) on the Agilent 2100  
205 Bioanalyzer (Agilent Technologies, G2939BA). The libraries were pooled based on lung weights  
206 to ensure even reading depth, cleaned up again using AMPure XP beads, and sequenced (read  
207 length 2x150bp) on the Illumina HiSeq 2500 or NextSeq 500 platform (Admera Health  
208 Biopharma Services).

209

#### 210 **Tuba-seq analysis of tumor barcode reads**

211 The FASTQ files were parsed to identify the sgID and barcode (BC) for each read. Each  
212 read is expected to contain an 8-nucleotide sgID region followed by a 30-nucleotide barcode  
213 (BC) region (GCNNNNNTANNNNNGCNNNNNTANNNNNGC), and each of the 20 Ns  
214 represents random nucleotides. The sgID region identifies the putative tumor suppressor gene  
215 being targeted, for which we require a perfect match between the sequence in the forward read  
216 and one of the forward sgIDs with known sequences. Note that all sgID sequences differ from  
217 each other by at least three nucleotides. Therefore, the incorrect assignment of sgID due to PCR  
218 or sequencing error is extremely unlikely. All cells generated from the clonal expansion of an  
219 original cell transduced with a lentiviral vector carry the same BC sequence. To minimize the  
220 effects of sequencing errors on calling the BC, we require the forward and reverse reads to agree  
221 completely within the 30-nucleotide sequence to be further processed. In our pipeline, any tumor  
222 that is within a Hamming distance of two from a larger tumor is assigned as a “spurious tumor”,

223 which likely results from sequencing or PCR errors and the tumor is removed from subsequent  
224 analysis. Reads with the same sgID and barcode are assigned to be the same tumor. The tumor  
225 size (number of neoplastic cells) is calculated by normalizing the number of reads to the three  
226 benchmarks “spike-in” cell lines added to each sample prior to lysis of the lung and DNA  
227 extraction step. The median sequencing depth was ~ 1 read per 4.8 cells, and the minimum  
228 sequencing depth is ~1 read per 16.5 cells. We have high statistical power in identifying tumors  
229 with more than 200 cells, which was used as the minimum cell number cutoff for calling tumors.  
230 A minimum cell number of 50 was used for calling expansions in **Figures S5 and S6**).  
231 Minimizing the influence of GC amplification bias on tumor-size calling was done as previously  
232 described <sup>88</sup>.

233

#### 234 **Measures of tumor size and growth**

235 We used several metrics of tumor number, burden and size (see **Supplemental Figure 4** in <sup>90</sup> for  
236 additional details on the calculation of these metric).

237

| <b>Measure of tumor suppressor strength</b> | <b>Methodology</b> | <b>Description</b>                                                                                                                                                                                                                                           |
|---------------------------------------------|--------------------|--------------------------------------------------------------------------------------------------------------------------------------------------------------------------------------------------------------------------------------------------------------|
| Surface tumor size                          | visual inspection  | Tomato-positive expansions larger than 0.5 mm in diameter                                                                                                                                                                                                    |
| Relative tumor size / expansion size        | Tuba-seq           | Tumor/expansion size at the indicated percentile was calculated using tumors (clonal cell populations >200 cells) or expansions (clonal cell populations >50 cells) merged from all mice and normalized to the same percentile of sgInert tumors/expansions. |
| Relative tumor burden                       | Tuba-seq           | Tumor burden was calculated as the sum of neoplastic cells per mouse averaged over all mice and normalized to the tumor burden of sgInert tumors.                                                                                                            |
| Relative tumor number                       | Tuba-seq           | Tumor numbers above a given size threshold (e.g., 1000 cells) were determined by calculating the number of tumors above the threshold per mouse averaged over all mice and normalized to the tumor number of sgInert tumors.                                 |
| Relative frequency                          | Tuba-seq           | The relative frequency of each sgRNA was calculated in each sample (one sample can contain multiple sgRNAs due to multiple transduction or multiple tumors being present in the sample) and                                                                  |

|                           |          |                                                                                                                                                                                                                                                                        |
|---------------------------|----------|------------------------------------------------------------------------------------------------------------------------------------------------------------------------------------------------------------------------------------------------------------------------|
|                           |          | averaged for each sgRNA over all samples for a given mouse genotype.                                                                                                                                                                                                   |
| Frequency in large tumors | Tuba-seq | To find synergistic combinations in our data, we ranked all possible combinations of targeted genes by their frequency of co-mutation in the largest tumors. See Method section "Multiple transduction" for how largest tumors and co-mutations of genes were defined. |

238

239

240

241

242

243

244

245

246

247

248

249

250

251

252

253

254

255

256

257

Tumor burden and tumor number are affected linearly by the titer of each Lenti-

sgRNA/Cre vector in the pool. When applicable, we used data on the number of tumors from *KT*

mice (which lack Cas9) to quantify the representation of each Lenti-sgRNA/Cre vectors in the

lentiviral pool. Therefore, when calculating tumor burden and tumor number metrics, we

normalized the metric to the effective titer based on data from *KT* mice to account for the viral

titer differences among different Lenti-sgRNA/Cre vectors. Tumor/expansion size percentiles,

tumor burden, and tumor number were normalized to the values of the same metric for tumors

with inert sgRNAs, thus the expression "relative" is used.

For relative tumor/expansion size, relative tumor burden and relative tumor number,

confidence intervals and p-values were calculated by a nested bootstrap resampling approach to

account for variation in sizes of tumors of a given genotype both across and within mice. First,

tumors of each mouse were grouped, and these groups (mice) were resampled. Second, all

tumors of a given mouse resampling were bootstrapped on an individual basis (10,000

repetitions). For relative frequency, tumors were bootstrap resampled 10,000 times, and the

distribution of inert sgRNA frequencies was used to calculate p-values for enrichment of all

other sgRNAs. For "frequency in large tumors", a permutation test was used to calculate p-values

(see section **Multiple transduction** for details).

## **Multiple transduction**

258 A fraction of lung tumors initiated with Lenti-*sgRNA/Cre* vectors contained multiple barcoded  
259 Lenti-*sgRNA/Cre* vectors. If multiple barcodes (sgID-BCs) have unexpectedly similar read  
260 counts (as shown in the example plots below), we suspect transduction of the initial cell with  
261 multiple Lenti-*sgRNA/Cre* vectors.

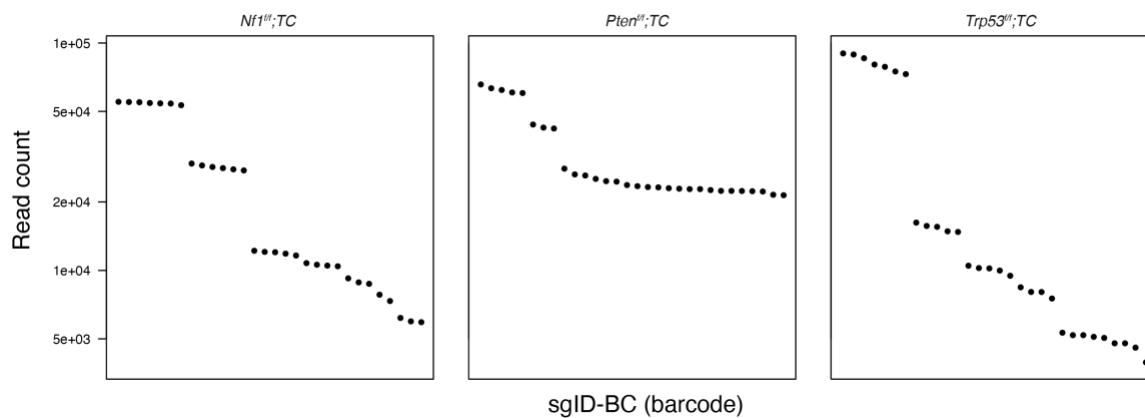

262  
263 **Example plots indicating strong evidence of transduction with multiple barcoded lentiviral vectors in the largest tumors**  
264 **in each genotype.** 30 sgID-BCs with the highest read counts from representative mouse samples are shown. Indicated genotypes  
265 of mice were transduced with Lenti-*sgTS14/Cre* pool. Each dot represents a sgID-BC, the y-axis shows read count, and the sgID-  
266 BCs are sorted on the x-axis by decreasing read counts. Groups of barcodes sgID-BCs that have very similar read counts likely  
267 represents a single clonal tumor initiated from a cell transduced with multiple barcoded Lenti-*sgRNA/Cre* vectors.

268  
269 To capitalize on these multiple transductions as a way to find higher-order interactions  
270 between tumor suppressor genes, we developed a method to identify the combinations of sgRNA  
271 that appear to cooperate as potent drivers of tumor growth. Accurate identification of coinfecting  
272 tumors and grouping of barcodes without over grouping was not a trivial task. We developed  
273 methods to identify tumors with likely multiple transductions (*i.e.*, those tumors with complex  
274 genotypes with multiple tumor suppressor genes inactivated). For each sgID-BC, we listed all  
275 other sgID-BCs from the same sample with read counts within 10% as possible multiple  
276 transduction events. A tumor with multiple transductions can be most easily identified among the  
277 largest tumors in each mouse as smaller tumors of similar sizes are too abundant. Multiple

278 transductions that lead to synergistic combinatorial tumor suppressor alterations would confer a  
279 growth advantage. Thus, synergistic combinatorial alterations of tumor suppressor genes would  
280 be expected to be overrepresented among the largest tumors.

281 To have a dataset with a higher signal-to-noise ratio, we analyzed the largest tumors that  
282 were co-infected with up to 6 Lenti-sgRNA/*Cre* vectors. With this method, for each tumor, we  
283 assembled a list of genes that were possibly co-mutated. We then ranked all possible  
284 combinations of genes by their frequency in the largest tumors (**Figure 2f-g** and **S6c-h**).

285 An inherent problem with this analysis is that the genotypes that increase tumor growth  
286 will be overrepresented amongst the largest tumors even without multiple transductions and  
287 specific synergistic interactions. To account for the different number of tumors with different  
288 sgIDs, we performed a permutation test, where we control for the number of tumors of each  
289 genotype but randomize the sizes of tumors by randomly matching the genotypes with tumor  
290 sizes (10,000 repetitions). Synergistic tumor suppressor combinations will occur at significantly  
291 higher than expected frequencies based on this permutation test (**Figure 2f-g** and **S6c-h**).

292 Reassuringly, while our analysis resulted in significant enrichment of complex genotypes based  
293 on the permutation test, a control analysis performed on smaller tumors within the same mice  
294 with high noise to signal ratio resulted in a loss of statistical significance, this shows that our  
295 permutation test controls for the bias of different frequency of sgIDs among the tumors.

296

### 297 **Fitness landscape and adaptive paths**

298 To investigate the possible adaptive steps that can lead to the complex genotype of  
299 coincident inactivation of *Nfl*, *Rasa1*, and *Pten*, we first measured the fitness of all possible  
300 combinations of *Nfl*, *Rasa1*, and *Pten* mutations (**Figure 3f** and **S10g**). Relative (Malthusian)



301 fitness was calculated based on the number of individuals (cells) at the end ( $N_1$ ) and the  
302 beginning of ( $N_0$ ) of a time period <sup>92</sup>. For each genotype, the overall sum of neoplastic cells at  
303 the end of the experiment ( $N_1$ ) was calculated as the sum of cells from all tumors in each mouse.  
304 As we use *KT* mice (which lack Cas9 and all sgRNAs have no effect) to approximate the  
305 effective titer of our virus pool (see section Measures of tumor size and growth), the initial  
306 number of cells transduced ( $N_0$ ) was calculated from the number of tumors generated in control  
307 *KT* mice. Next, the relative fitness for genotype A compared to wild type (wt) was calculated as:

$$\frac{\log_2 \frac{N_{1,A}}{N_{0,A}}}{\log_2 \frac{N_{1,wt}}{N_{0,wt}}}$$

309 Fitness values relative to wild type are displayed as nodes on the adaptive landscape  
310 (**Figure 3f** and **S10g**), where genotypes one mutation away from each other are connected by  
311 arrows that represent mutations. In the case of the *Nfl;Rasa1;Pten* triple mutant state, six  
312 adaptive paths can lead from wild type to that triple mutant genotype (**Figure 3f** and **S10g**).  
313 Arrows are shown if the mutation increases the fitness. In **figure 3f** and **S10g** all arrows are  
314 shown since all mutations increase fitness.

315 Next, we set out to approximate the relative probabilities of different adaptive paths  
316 leading from wild type to the triple mutant genotype with a simple population genetic model. In  
317 the model, cell populations start from the wild-type genotype, and they can acquire any of the  
318 three mutations present in the triple genotype. In the population of cells, a mutation can arise and  
319 then change in frequency until one of two outcomes happens: (i) the frequency of the mutation  
320 drops to zero, and the mutation is lost from the population or (ii) the frequency of the mutation  
321 reaches 1, when it is present in all the cells and hence is fixed in the population. When a  
322 mutation fixes in a population, we consider the genotype of the population to change and that

323 constitutes a “step” on the fitness landscape. We assume a “strong selection weak mutation”  
324 regime, where there is no more than one mutation simultaneously present with a frequency less  
325 than 1. We also assume that mutations appear randomly and with equal probabilities. Mutations  
326 can appear and get lost multiple times in a population, and as long as populations have at least  
327 one mutation that increases fitness, one of those mutations will fix in the population eventually.

328         With the model we are estimating the probability of each adaptive step given that the  
329 population starts from the wild-type state. Therefore, the probability of each adaptive step will be  
330 influenced by the probabilities of previous step(s) and the sum of probabilities of adaptive steps  
331 originating from a given genotype must equal the sum of probabilities of all adaptive steps  
332 terminating in the given genotype. If there are multiple adaptive steps originating from the same  
333 genotype, they will have probabilities proportional to the fixation probabilities of their respective  
334 mutations. The fixation probability of a mutation is proportional to its selective advantage  
335  $(\frac{\text{fitness after mutation}}{\text{fitness before mutation}} - 1)^{93}$ . As an example, if there are two adaptive steps originating from a  
336 genotype with fitness 1.00, one terminating in a genotype with fitness 1.1, the other in a  
337 genotype with fitness 1.2, then they have 10% and 20% selective advantage, respectively.  
338 Therefore, one adaptive step will happen half as likely as the other, as the selective advantages  
339 and therefore the relative fixation probabilities are in a ratio of 1:2.

340

### 341 **Targeted sequencing of oncogenic loci for potential spontaneous oncogenic mutation**

342         To determine whether the tumors that develop contained spontaneous oncogenic  
343 mutations, we performed Sanger Sequencing and Illumina sequencing (HiSeq 2500 platform;  
344 read length 2x150 bp, Admera Health Biopharma Services) on select regions of *Kras*, *Egfr*, *Braf*,  
345 and *Nras* (the 4 frequently mutated oncogenes in lung adenocarcinoma).

346 PCR products were obtained through amplification with primers listed below on DNA  
 347 extracted from dissected tumors (**Table S2**) and cleaned up using ExoSAP (ThermoFisher  
 348 Scientific, Cat# 78-201) treatment before Sanger.

| Oncogene and associated codon        | Primer                                                              |
|--------------------------------------|---------------------------------------------------------------------|
| <i>Kras</i> Codon 12+13<br>Forward   | ACACTCTTCCCTACACGACGCTCTCCGATCTNN<br>NNNNTTATTTTATTGTAAGGCCTGCT     |
| <i>Kras</i> Codon 12+13<br>Reverse   | GTGACTGGAGTTCAGACGTGTGCTCTCCGATCTN<br>NNNNNNTTACAAGCGCACGCAGA       |
| <i>Kras</i> Codon 61<br>Forward      | ACACTCTTCCCTACACGACGCTCTCCGATCTNN<br>NNNNNCCTGTCTCTTGGATATTCTCGAC   |
| <i>Kras</i> Codon 61 Reverse         | GTGACTGGAGTTCAGACGTGTGCTCTCCGATCTN<br>NNNNNNNCAGTTCTCATGTACTGGTCCCT |
| <i>Egfr</i> Codon 721<br>Forward     | ACACTCTTCCCTACACGACGCTCTCCGATCTNN<br>NNNNNCCAGCGGAGAAGCTCCAAAC      |
| <i>Egfr</i> Codon 721<br>Reverse     | GTGACTGGAGTTCAGACGTGTGCTCTCCGATCTN<br>NNNNNNNATACTGTGCCAAATGCTCCC   |
| <i>Egfr</i> Codon 734-756<br>Forward | ACACTCTTCCCTACACGACGCTCTCCGATCTNN<br>NNNNTCTTCTTAATCTCAGGGTCTCTGG   |
| <i>Egfr</i> Codon 734-756<br>Reverse | GTGACTGGAGTTCAGACGTGTGCTCTCCGATCTN<br>NNNNNCACGTCAAGGATTTCTTTGTTGGC |

|                                      |                                                                        |
|--------------------------------------|------------------------------------------------------------------------|
| <i>Egfr</i> Codon 764-793<br>Forward | ACACTCTTCCCTACACGACGCTCTTCCGATCTNN<br>NNNNNNTTACCCAGAAAGGGATATGCGTG    |
| <i>Egfr</i> Codon 764-793<br>Reverse | GTGACTGGAGTTCAGACGTGTGCTCTTCCGATCTN<br>NNNNNNNNGGCAACCGTAGGGCATGAG     |
| <i>Egfr</i> Codon 860+863<br>Forward | ACACTCTTCCCTACACGACGCTCTTCCGATCTNN<br>NNNNGTGAAGACACCACAGCATGTCAAG     |
| <i>Egfr</i> Codon 860+863<br>Reverse | GTGACTGGAGTTCAGACGTGTGCTCTTCCGATCTN<br>NNNNNNGCTTCCTGATCTACTCCCAGGAC   |
| <i>Braf</i> Codon 503-509<br>Forward | ACACTCTTCCCTACACGACGCTCTTCCGATCTNN<br>NNNNNNGACTGGGAGATTCCTGATGGAC     |
| <i>Braf</i> Codon 503-509<br>Reverse | GTGACTGGAGTTCAGACGTGTGCTCTTCCGATCTN<br>NNNNNNNNcgtgtatacataccatgtcccac |
| <i>Braf</i> Codon 637<br>Forward     | ACACTCTTCCCTACACGACGCTCTTCCGATCTNN<br>NNNNGACCTCACGGTAAAAATAGGTGAC     |
| <i>Braf</i> Codon 637<br>Reverse     | GTGACTGGAGTTCAGACGTGTGCTCTTCCGATCTN<br>NNNNNNAACTGTTCAAACCTGATGGGACC   |
| <i>Nras</i> Codon 12+13<br>Forward   | ACACTCTTCCCTACACGACGCTCTTCCGATCTNN<br>NNNNNNTTCTACAGGTTTTTGCTGGTGTG    |
| <i>Nras</i> Codon 12+13<br>Reverse   | GTGACTGGAGTTCAGACGTGTGCTCTTCCGATCTN<br>NNNNNNNNGATTAGCTGGATCGTCAAGGC   |

|                              |                                     |
|------------------------------|-------------------------------------|
| <i>Nras</i> Codon 61         | ACACTCTTTCCCTACACGACGCTCTTCCGATCTNN |
| Forward                      | NNNNCGAAAGCAAGTGGTGATTGATGG         |
|                              | GTGACTGGAGTTCAGACGTGTGCTCTTCCGATCTN |
| <i>Nras</i> Codon 61 Reverse | NNNNNNAATACACAGAGGAACCCCTTCG        |

349 N: random nucleotides added to increase the diversity of PCR products for Illumina Sequencing.

350 Illumina sequencing was performed on pools of amplicons. The libraries were pooled  
351 based on band intensity to ensure even read depth and cleaned up using Sera-Mag Select beads  
352 (Thermo Fisher Scientific, Cat# 09-928-107) before undergoing a second round of PCR to attach  
353 the sequencing adaptors needed for the HiSeq platform. Second round PCR products were then  
354 purified with Sera-Mag Select beads before sequencing.

|                    |                                       |
|--------------------|---------------------------------------|
| P5 adapter with i5 | AATGATACGGCGACCACCGAGATCTACACNNNNN    |
| Index              | NNNacactctttccctacacgac               |
| P7 adapter with i7 | CAAGCAGAAGACGGCATAACGAGATNNNNNNgtgact |
| Index              | ggagttcagacgtg                        |

355 N's represent i5 and i7 indices.

356

### 357 **Analysis of targeted DNA-sequencing of *Kras*, *Egfr*, *Braf*, and *Nras* oncogenic loci**

358 Sequenced reads were analyzed using Genome Analysis Toolkit (GATK, Broad Institute  
359 <sup>94</sup>). “Somatic short variant discovery” best practices pipeline for tumor samples similarly as for  
360 whole exome sequencing (see below). However, for targeted sequencing, identification of  
361 duplicate reads (Picard MarkDuplicates algorithm) was omitted as that would result in the loss of  
362 reads with matching start and end position, which is normal in targeted sequencing and is not a  
363 sign of duplicate artifacts. A mean coverage of 6665-7584 reads was achieved for all samples

364 with 90% of regions having a coverage over 275 reads in all samples. Variant calls made and  
365 filtered by GATK Mutect2 function were annotated with Ensembl Variant Effect Predictor <sup>95</sup>.  
366 Pick-allele-gene option was used to filter results on the most relevant transcript for each  
367 variation. We filtered the results for the known oncogenic codons listed above and variants with  
368 a minimum of 5% allele frequency.

369

### 370 **Whole exome sequencing**

371 DNA was extracted from 4 individual tumors from *TC* mice transduced with Lenti-*sgNf1*-  
372 *sgRasa1*-*sgPten*, three months after tumor initiation, using Qiagen AllPrep DNA/RNA Micro kit.  
373 Whole-exome sequencing library preparation was performed by Admera Health using SureSelect  
374 XT Mouse All Exon Kit (Agilent).

375 Sequenced reads on autosomes were analyzed using Genome Analysis Toolkit (GATK,  
376 Broad Institute <sup>94</sup>) “Somatic short variant discovery” best practices pipeline for tumor samples.  
377 Mean coverage of 50-72 reads was achieved for all samples, with 90% of regions having  
378 coverage over 20 reads in all samples. Variant calls made and filtered by GATK Mutect2  
379 function and were annotated with Ensembl Variant Effect Predictor (VEP <sup>95</sup>). The pick-allele-  
380 gene option was used to filter results on the most relevant transcript for each variant. The same  
381 exact variants appearing in multiple tumor samples were flagged as germline variant and were  
382 removed. We filtered the results for protein-coding variation, variants with a minimum of 5%  
383 allele frequency, and removed variations in the olfactory OLFR gene family that are likely  
384 germline variations.

385

### 386 **Analysis of insertion and deletions**

387 Indel analysis was performed to confirm that insertion and deletions (indels) were generated at  
388 the targeted loci as follows: gDNA was isolated from at oncogene-negative mouse cell lines or  
389 FACS-sorted Tomato<sup>positive</sup> cancer cells using either the AllPrep DNA/RNA(Qiagen) or the  
390 DNeasy Blood and Tissue Kit. PCR primers were designed to amplify sgRNA-targeted loci,  
391 resulting in 500 to 1000 bp amplicons specific to each locus. Amplicons were purified using  
392 PCR purification kit (Qiagen) and sequenced by Sanger sequencing. Cutting efficiency was  
393 determined by ICE analysis (<https://ice.synthego.com/#/>)

| Targeted gene                              | Primer                  |
|--------------------------------------------|-------------------------|
| <i>Nf1</i> -Amplification Forward primer   | GCAATTTTGGGGGAACGCCT    |
| <i>Nf1</i> -Amplification Reverse primer   | AAAACCAAGAGAGGGTCAGAGCC |
| <i>Nf1</i> -Sequencing primer              | CAGCGATTCTAAAATACCAATGC |
| <i>Rasa1</i> -Amplification Forward primer | GGAGCACGGTATGTGTCGTT    |
| <i>Rasa1</i> -Amplification Reverse primer | TCCTCTTTAGCGTAGCCAGGAA  |
| <i>Rasa1</i> -Sequencing primer            | TTGGTGAAAGCGACGTCTC     |
| <i>Pten</i> -Amplification Forward primer  | TGAATACACAGTGGCCTTTGCTT |
| <i>Pten</i> -Amplification Reverse primer  | CAGAGACTGCATCTGGTGGTT   |
| <i>Pten</i> -Sequencing primer             | CATTGGGTAGCTTTCTTAACC   |

394

395 **Histology and immunohistochemistry**



396 Lung lobes were inflated with 4% formalin and fixed for 24 hours, stored in 70% ethanol,  
397 paraffin-embedded, and sectioned. 4  $\mu\text{m}$  thick sections were used for Hematoxylin and Eosin  
398 (H&E) staining and immunohistochemistry (IHC).

399 Primary antibodies used for IHC were anti-RFP (Rockland, 600-401-379), anti-  
400 TTF1(Abcam, ab76013), anti-UCHL1(Sigma, HPA005993), anti-TP63 (Cell Signaling  
401 Technology, 13109), anti-phospho-S6 (Cell Signaling Technology, 4858), anti-PTEN (Cell  
402 Signaling Technology, 9559), anti-phospho-ERK (Cell Signaling Technology, 4370), anti-  
403 phospho-AKT (Thermo Fisher Scientific, 44-621G), and anti-HMHGA2 (Biocheck, 59170AP).  
404 IHC was performed using Avidin/Biotin Blocking Kit (Vector Laboratories, SP-2001), Avidin-  
405 Biotin Complex kit (Vector Laboratories, PK-4001), and DAB Peroxidase Substrate Kit (Vector  
406 Laboratories, SK-4100) following standard protocols.

407 Images of the H&E-stained slides were analyzed with ImageJ. Tumor areas were  
408 converted from pixels to  $\text{mm}^2$  via a ruler. To quantify the positivity of phospho-ERK and  
409 phospho-AKT stained slides, H-scores were calculated using Qupath. The H-score is determined  
410 by adding the results of multiplication of the percentage of cells with staining intensity ordinal  
411 value (scored from 0 for “no signal” to 3 for “strong signal”) with possible values ranging from 0  
412 to 300<sup>96</sup>. To normalize potential variations between different rounds of immunohistochemistry,  
413 one patient sample was included and stained for both pERK and pAKT in all rounds of staining  
414 as a control.

415

#### 416 **Immunoblotting**

417  $3 \times 10^5$  cells were seeded into 6-well plates and allowed to adhere overnight in regular  
418 growth media and cultured in the presence or absence of 10  $\mu\text{M}$  of Capivasertib, RMC-4550, or

419 a combination of both drugs. After 24 hours, the protein was extracted using RIPA lysis buffer  
420 (Thermo Fisher Scientific, 89900) and proteinase/phosphatase inhibitor cocktail (Thermo Fisher  
421 Scientific, 78442). Protein concentration was measured using BCA protein assay kit (Thermo  
422 Fisher Scientific, 23250). Proteins (30 µg from each sample) were separated by SDS-PAGE and  
423 immunoblotted and transferred to polyvinyl difluoride (PVDF) membranes (BioRad, 162-0177)  
424 according to standard protocols. Membranes were immunoblotted with antibodies against  
425 phospho-ERK (Cell Signaling Technology, 4370), ERK (Cell Signaling Technology, 9102),  
426 phospho-AKT (Thermo Fisher Scientific, 44-621G), AKT (Cell Signaling Technology, 4691),  
427 phospho-S6 (Cell Signaling Technology, 4858), S6 (Cell Signaling Technology, 2217), anti-  
428 RASA1 (Abcam, ab2922), anti-PTEN (Cell Signaling Technology, 9559), and HSP90 (BD  
429 Bioscience, 610418). Immunoblots were developed using Supersignal® West Dura Extended  
430 Duration Chemiluminescent Substrate (Thermo Fisher Scientific, 37071). Initially, the  
431 membranes were immunoblotted against non-phosphorylated targets, and after stripping these  
432 antibodies using Western Blot Stripping Buffer (Thermo Fisher Scientific, 46430), they were  
433 immunoblotted against phosphorylated antibodies. Developing the signal was done using Dura  
434 Extended Duration Chemiluminescent Substrate (Thermo Fisher Scientific, 37071). All  
435 immunoblots were performed at least three times independently.

436

### 437 **Cell Lines and Reagents**

438 Mouse oncogene-negative cell lines were generated from tumors initiated in  
439 *Trp53<sup>flox/flox</sup>;TC BL6* mice four months after transduction with Lenti-*sgNfl*-*sgRasa1*-*sgPten*/*Cre*.  
440 After dissociation of tumors (described below), cells were cultured in DMEM supplemented with  
441 10% FBS, 1% penicillin/streptomycin (Gibco), and 0.1% Amphotericin (Life Technologies).

442 HC494 and MMW389T2 (*Kras*<sup>G12D</sup> and *Trp53* mutant) lung adenocarcinoma cells were  
443 previously generated in the Winslow Lab. Human oncogene-negative cell lines (NCI-H1838,  
444 NCI-H1623) and oncogene-positive cell lines (A549, H2009, NCI-H2009, SW1573, HOP62,  
445 NCI-H358, NCI-H1792) were purchased from ATCC and cultured in RPMI supplemented with  
446 5%FBS, 1% penicillin/streptomycin (Gibco), and 0.1% Amphotericin (Life Technologies). We  
447 performed mycoplasma testing using MycoAlert™ Mycoplasma Detection Kit (Lonza). Cell  
448 were maintained at 37°C in a humidified incubator at 5% CO<sub>2</sub>. Mutations in components of RAS  
449 and PI3K pathways of NCI-H1838, NCI-H1623 (based on **Table S6**) are indicated in the table  
450 below (extracted from DepMap):

| Cell line | Pathway | Gene   | Protein Change |
|-----------|---------|--------|----------------|
| NCI-H1838 | RAS     | NF1    | p.N184fs       |
| NCI-H1838 | RAS     | IQGAP2 | p.P780L        |
| NCI-H1623 | RAS     | FGFR2  | p.A355S        |
| NCI-H1623 | RAS     | ERF    | p.G255C        |
| NCI-H1623 | RAS     | RASA1  | p.A47fs        |

451

#### 452 **Clonogenic, apoptosis, and proliferation assays**

453 For clonogenic assays, mouse cells were seeded in triplicate into 24-well plates (4000  
454 cells per well) and allowed to adhere overnight in regular growth media. Cells were then cultured  
455 in the absence or presence of the drug as indicated on each figure panel in complete media for 4  
456 days. Growth media with or without drugs was replaced every 2 days. The remaining cells were  
457 stained with 0.5% crystal violet in 20% methanol and photographed using a digital scanner.

458 Relative growth was quantified by densitometry after extracting crystal violet from the stained  
459 cells using 100% methanol <sup>97</sup>.

460 Clonogenic assay of human oncogene-negative lung adenocarcinoma cell lines were done  
461 in spheroids <sup>98</sup>. 400-5000 cells/well were seeded in round bottom ultra-low attachment 96-well  
462 plates (Corning) in growth media and incubated for 72 hours at 37°C in 5% CO<sub>2</sub>. Spheroid  
463 formation was confirmed visually, and spheroids were treated in triplicate with dilutions of  
464 RMC-4550 and capivasertib in complete growth media. Following drug exposure for five days,  
465 cell viability in spheroids was determined using the CellTiter-Glo 3D assay kit (Promega),  
466 following the manufacturer's instructions. Luminescence was read in a Plate Reader. Assay data  
467 was normalized to DMSO values.

468 Drug synergism was analyzed using SynergyFinder (<https://synergyfinder.fimm.fi>) web  
469 application <sup>99</sup>. The degree of combination synergy, or antagonism, was quantified by comparing  
470 the observed drug combination response against the expected response, calculated using Loewe's  
471 model that assumes no interaction between drugs <sup>100</sup>.

472 For apoptosis and proliferation assays,  $3 \times 10^5$  cells were seeded into 6-well plates, and  
473 allowed to adhere overnight in regular growth media, and cultured in the presence or absence of  
474 10  $\mu$ M of Capivasertib, RMC-4550, or a combination of both drugs. After 24 hours, apoptosis  
475 and cell proliferation were determined through staining with Fixable Viability Dye eFluor™ 450  
476 (Thermo Fisher Scientific, 65-0863-14), cleaved caspase 3 Antibody (Cell Signaling  
477 Technology, 9669), and Click-iT™ EdU Alexa Fluor™ 647 Flow Cytometry Assay Kit (Thermo  
478 Fisher Scientific, C-10424) according to the manufacturer's instructions. Data were acquired  
479 using a BD LSR II Flow Cytometer. All experiments were performed independently two times  
480 on 3 different cell lines.

481

482 ***In vivo* drug response studies**

483 For drug efficacy studies in autochthonous mouse models, *TC* mice (8-12 weeks old)  
484 were divided into 4 groups randomly 3.5 months after tumour initiation. They received the  
485 vehicle, capivasertib (100 mg/kg, MedChemExpress), RMC-4550 (30 mg/kg,  
486 MedChemExpress), or a combination of both dissolved in 10% DMSO, 40% PEG, 5% Tween  
487 80, and 45% PBS through a gavage needle. Mice were treated daily with drugs for eight days,  
488 and the treatment was stopped for two days for recovery, and it continued for two more days  
489 before the tissue harvest. The last two doses of combination therapy were half of the initial  
490 doses.

491

492 **Tumor dissociation, cell sorting, and RNA-sequencing**

493 Primary tumors were dissociated using collagenase IV, dispase, and trypsin at 37 °C for  
494 30 min. After dissociation, the samples remained continually on ice, were in contact with ice-  
495 cold solutions, and were in the presence of 2 mM EDTA and 1 U/ml DNase to prevent  
496 aggregation. Cells were stained with antibodies to CD45 (BioLegend, 103112), CD31  
497 (BioLegend, 303116), F4/80 (BioLegend, 123116), and Ter119 (BioLegend, 116212) to exclude  
498 hematopoietic and endothelial cells (lineage-positive (Lin<sup>+</sup>) cells). DAPI was used to exclude  
499 dead cells. FACS Aria sorters (BD Biosciences) were used for cell sorting.

500 RNA was purified using RNA/DNA All Prep kit (Qiagen, 80284). RNA quality of each tumor  
501 sample was assessed using the RNA6000 PicoAssay for the Agilent 2100 Bioanalyzer as per the  
502 manufacturer's recommendation. 4.4 ng total RNA per sample was used for cDNA synthesis and  
503 library preparation using Trio RNA-Seq, Mouse rRNA kit (Tecan, 0507-32), according to the



504 manufacturer's instructions. The purified cDNA library products were evaluated using the  
505 Agilent bioanalyzer and sequenced on NextSeq High Output 1x75 (Admera Health Biopharma  
506 Services).

507

### 508 **Analysis of mouse model-derived RNA-seq datasets**

509 Paired-end RNA-seq reads were aligned to the mm10 mouse genome using STAR  
510 (v2.6.1d) 2-pass mapping and estimates of transcript abundance were obtained using RSEM  
511 (v1.2.30) <sup>101, 102</sup>. The differentially expressed genes between different tumor genotypes and  
512 treatment groups were called by DESeq2 using transcript abundance estimates via tximport <sup>103</sup>,  
513 <sup>104</sup>. The DESeq2-calculated fold changes were used to generate ranked gene lists for input into  
514 GSEA <sup>105</sup>.

515 The upregulated genes with absolute log<sub>2</sub> fold change greater than 1 and a false  
516 discovery rate less than 0.05 in the comparison of *Nf1*, *Rasa1*, and *Pten* mutant oncogene-  
517 negative tumors with Kras<sup>G12D</sup>-driven tumors (*KTC+sgInert* and *KTC+sgPten*)  
518 were compiled into a signature reflecting the oncogene-negative adenocarcinoma state. This gene  
519 signature was utilized in the analysis of human oncogene-positive and oncogene-negative  
520 tumors. Scaled estimates of transcript abundance for TCGA LUAD samples were obtained from  
521 the GDC data portal ([gdc-portal.nci.nih.gov](http://gdc-portal.nci.nih.gov)). Each expression profile was then scored on the  
522 basis of the mouse-derived gene signature using single-sample GSEA within the Gene Set  
523 Variation Analysis (GSVA) package <sup>106</sup>.

524

### 525 **Data availability**

526 Tuba-seq barcode sequencing and RNA-seq data have been deposited in NCBI's Gene  
527 Expression Omnibus (<https://www.ncbi.nlm.nih.gov/geo/>) and are accessible through GEO  
528 Series accession number GSE174393. Whole exome sequencing data generated in our study are  
529 publicly available in SRA-NCBI ([www.ncbi.nlm.nih.gov/sra](http://www.ncbi.nlm.nih.gov/sra)), under BioProject accession  
530 number PRJNA769722.

531

### 532 **Acknowledgments**

533 The results in Figures 1 and 4 are in part based upon data generated by the TCGA Research  
534 Network (<https://www.cancer.gov/tcga>) and Genomics Evidence Neoplasia Information  
535 Exchange (GENIE).

536

### 537 **References:**

- 538 1. Gao, Q. *et al.* Driver Fusions and Their Implications in the Development and  
539 Treatment of Human Cancers. *Cell Rep* **23**, 227-238 e223 (2018).
- 540 2. Lu, X. *et al.* MET Exon 14 Mutation Encodes an Actionable Therapeutic Target in  
541 Lung Adenocarcinoma. *Cancer Res* **77**, 4498-4505 (2017).
- 542 3. Liu, J. *et al.* An Integrated TCGA Pan-Cancer Clinical Data Resource to Drive  
543 High-Quality Survival Outcome Analytics. *Cell* **173**, 400-416 e411 (2018).
- 544 4. Hallin, J. *et al.* The KRAS(G12C) Inhibitor MRTX849 Provides Insight toward  
545 Therapeutic Susceptibility of KRAS-Mutant Cancers in Mouse Models and  
546 Patients. *Cancer Discov* **10**, 54-71 (2020).
- 547 5. Canon, J. *et al.* The clinical KRAS(G12C) inhibitor AMG 510 drives anti-tumour  
548 immunity. *Nature* **575**, 217-223 (2019).
- 549 6. Jackson, E.L. *et al.* Analysis of lung tumor initiation and progression using  
550 conditional expression of oncogenic K-ras. *Genes Dev* **15**, 3243-3248 (2001).
- 551 7. Winters, I.P. *et al.* Multiplexed in vivo homology-directed repair and tumor  
552 barcoding enables parallel quantification of Kras variant oncogenicity. *Nat*  
553 *Commun* **8**, 2053 (2017).
- 554 8. Guerra, C. *et al.* Tumor induction by an endogenous K-ras oncogene is highly  
555 dependent on cellular context. *Cancer Cell* **4**, 111-120 (2003).
- 556 9. Hingorani, S.R. *et al.* Preinvasive and invasive ductal pancreatic cancer and its  
557 early detection in the mouse. *Cancer Cell* **4**, 437-450 (2003).
- 558 10. Zafra, M.P. *et al.* An In Vivo Kras Allelic Series Reveals Distinct Phenotypes of  
559 Common Oncogenic Variants. *Cancer Discov* **10**, 1654-1671 (2020).

- 560 11. Paez, J.G. *et al.* EGFR mutations in lung cancer: correlation with clinical  
561 response to gefitinib therapy. *Science* **304**, 1497-1500 (2004).
- 562 12. Lynch, T.J. *et al.* Activating mutations in the epidermal growth factor receptor  
563 underlying responsiveness of non-small-cell lung cancer to gefitinib. *N Engl J*  
564 *Med* **350**, 2129-2139 (2004).
- 565 13. Politi, K. *et al.* Lung adenocarcinomas induced in mice by mutant EGF receptors  
566 found in human lung cancers respond to a tyrosine kinase inhibitor or to down-  
567 regulation of the receptors. *Genes Dev* **20**, 1496-1510 (2006).
- 568 14. Li, D. *et al.* Bronchial and peripheral murine lung carcinomas induced by T790M-  
569 L858R mutant EGFR respond to HKI-272 and rapamycin combination therapy.  
570 *Cancer Cell* **12**, 81-93 (2007).
- 571 15. Ji, H. *et al.* The impact of human EGFR kinase domain mutations on lung  
572 tumorigenesis and in vivo sensitivity to EGFR-targeted therapies. *Cancer Cell* **9**,  
573 485-495 (2006).
- 574 16. Zhu, H. *et al.* Oncogenic EGFR signaling cooperates with loss of tumor  
575 suppressor gene functions in gliomagenesis. *Proc Natl Acad Sci U S A* **106**,  
576 2712-2716 (2009).
- 577 17. Lin, Q. *et al.* The association between BRAF mutation class and clinical features  
578 in BRAF-mutant Chinese non-small cell lung cancer patients. *J Transl Med* **17**,  
579 298 (2019).
- 580 18. van Veen, J.E. *et al.* Mutationally-activated PI3'-kinase-alpha promotes de-  
581 differentiation of lung tumors initiated by the BRAF(V600E) oncoprotein kinase.  
582 *Elife* **8** (2019).
- 583 19. Dankort, D. *et al.* A new mouse model to explore the initiation, progression, and  
584 therapy of BRAFV600E-induced lung tumors. *Genes Dev* **21**, 379-384 (2007).
- 585 20. Dankort, D. *et al.* Braf(V600E) cooperates with Pten loss to induce metastatic  
586 melanoma. *Nat Genet* **41**, 544-552 (2009).
- 587 21. Charles, R.P., Iezza, G., Amendola, E., Dankort, D. & McMahon, M. Mutationally  
588 activated BRAF(V600E) elicits papillary thyroid cancer in the adult mouse.  
589 *Cancer Res* **71**, 3863-3871 (2011).
- 590 22. Davies, H. *et al.* Mutations of the BRAF gene in human cancer. *Nature* **417**, 949-  
591 954 (2002).
- 592 23. Chin, L. *et al.* Essential role for oncogenic Ras in tumour maintenance. *Nature*  
593 **400**, 468-472 (1999).
- 594 24. Seeburg, P.H., Colby, W.W., Capon, D.J., Goeddel, D.V. & Levinson, A.D.  
595 Biological properties of human c-Ha-ras1 genes mutated at codon 12. *Nature*  
596 **312**, 71-75 (1984).
- 597 25. Der, C.J., Finkel, T. & Cooper, G.M. Biological and biochemical properties of  
598 human rasH genes mutated at codon 61. *Cell* **44**, 167-176 (1986).
- 599 26. Kwong, L.N. *et al.* Oncogenic NRAS signaling differentially regulates survival and  
600 proliferation in melanoma. *Nat Med* **18**, 1503-1510 (2012).
- 601 27. Ackermann, J. *et al.* Metastasizing melanoma formation caused by expression of  
602 activated N-RasQ61K on an INK4a-deficient background. *Cancer Res* **65**, 4005-  
603 4011 (2005).

- 604 28. Paik, P.K. *et al.* Response to MET inhibitors in patients with stage IV lung  
605 adenocarcinomas harboring MET mutations causing exon 14 skipping. *Cancer*  
606 *Discov* **5**, 842-849 (2015).
- 607 29. Drilon, A. *et al.* Antitumor activity of crizotinib in lung cancers harboring a MET  
608 exon 14 alteration. *Nat Med* **26**, 47-51 (2020).
- 609 30. Kim, M. *et al.* Patient-derived lung cancer organoids as in vitro cancer models for  
610 therapeutic screening. *Nat Commun* **10**, 3991 (2019).
- 611 31. Gow, C.H. *et al.* Oncogenic Function of a KIF5B-MET Fusion Variant in Non-  
612 Small Cell Lung Cancer. *Neoplasia* **20**, 838-847 (2018).
- 613 32. Gao, Y. *et al.* Allele-Specific Mechanisms of Activation of MEK1 Mutants  
614 Determine Their Properties. *Cancer Discov* **8**, 648-661 (2018).
- 615 33. Cai, D., Choi, P.S., Gelbard, M. & Meyerson, M. Identification and  
616 Characterization of Oncogenic SOS1 Mutations in Lung Adenocarcinoma. *Mol*  
617 *Cancer Res* **17**, 1002-1012 (2019).
- 618 34. Shaw, A.T. *et al.* Crizotinib versus chemotherapy in advanced ALK-positive lung  
619 cancer. *N Engl J Med* **368**, 2385-2394 (2013).
- 620 35. Maddalo, D. *et al.* In vivo engineering of oncogenic chromosomal  
621 rearrangements with the CRISPR/Cas9 system. *Nature* **516**, 423-427 (2014).
- 622 36. Pyo, K.H. *et al.* Establishment of a Conditional Transgenic Mouse Model  
623 Recapitulating EML4-ALK-Positive Human Non-Small Cell Lung Cancer. *J*  
624 *Thorac Oncol* **12**, 491-500 (2017).
- 625 37. Chiarle, R. *et al.* NPM-ALK transgenic mice spontaneously develop T-cell  
626 lymphomas and plasma cell tumors. *Blood* **101**, 1919-1927 (2003).
- 627 38. Soda, M. *et al.* Identification of the transforming EML4-ALK fusion gene in non-  
628 small-cell lung cancer. *Nature* **448**, 561-566 (2007).
- 629 39. Subbiah, V. *et al.* Precision Targeted Therapy with BLU-667 for RET-Driven  
630 Cancers. *Cancer Discov* **8**, 836-849 (2018).
- 631 40. Huang, Q. *et al.* Preclinical Modeling of KIF5B-RET Fusion Lung  
632 Adenocarcinoma. *Mol Cancer Ther* **15**, 2521-2529 (2016).
- 633 41. Saito, M. *et al.* A mouse model of KIF5B-RET fusion-dependent lung  
634 tumorigenesis. *Carcinogenesis* **35**, 2452-2456 (2014).
- 635 42. Shaw, A.T. *et al.* Crizotinib in ROS1-rearranged non-small-cell lung cancer. *N*  
636 *Engl J Med* **371**, 1963-1971 (2014).
- 637 43. Arai, Y. *et al.* Mouse model for ROS1-rearranged lung cancer. *PLoS One* **8**,  
638 e56010 (2013).
- 639 44. Inoue, M. *et al.* Mouse models for ROS1-fusion-positive lung cancers and their  
640 application to the analysis of multikinase inhibitor efficiency. *Carcinogenesis* **37**,  
641 452-460 (2016).
- 642 45. Farago, A.F. *et al.* Durable Clinical Response to Entrectinib in NTRK1-  
643 Rearranged Non-Small Cell Lung Cancer. *J Thorac Oncol* **10**, 1670-1674 (2015).
- 644 46. Vaishnavi, A. *et al.* Oncogenic and drug-sensitive NTRK1 rearrangements in lung  
645 cancer. *Nat Med* **19**, 1469-1472 (2013).
- 646 47. Drilon, A. *et al.* Response to ERBB3-Directed Targeted Therapy in NRG1-  
647 Rearranged Cancers. *Cancer Discov* **8**, 686-695 (2018).
- 648 48. Hyman, D.M. *et al.* AKT Inhibition in Solid Tumors With AKT1 Mutations. *J Clin*  
649 *Oncol* **35**, 2251-2259 (2017).

- 650 49. De Marco, C. *et al.* Mutant AKT1-E17K is oncogenic in lung epithelial cells.  
651 *Oncotarget* **6**, 39634-39650 (2015).
- 652 50. Berger, A.H. *et al.* Oncogenic RIT1 mutations in lung adenocarcinoma.  
653 *Oncogene* **33**, 4418-4423 (2014).
- 654 51. Pillai, R.N. *et al.* HER2 mutations in lung adenocarcinomas: A report from the  
655 Lung Cancer Mutation Consortium. *Cancer* **123**, 4099-4105 (2017).
- 656 52. Perera, S.A. *et al.* HER2YVMA drives rapid development of adenosquamous  
657 lung tumors in mice that are sensitive to BIBW2992 and rapamycin combination  
658 therapy. *Proc Natl Acad Sci U S A* **106**, 474-479 (2009).
- 659 53. Liu, S. *et al.* Targeting HER2 Aberrations in Non-Small Cell Lung Cancer with  
660 Osimertinib. *Clin Cancer Res* **24**, 2594-2604 (2018).
- 661 54. Weinstein, E.J., Kitsberg, D.I. & Leder, P. A mouse model for breast cancer  
662 induced by amplification and overexpression of the neu promoter and transgene.  
663 *Mol Med* **6**, 4-16 (2000).
- 664 55. Guy, C.T. *et al.* Expression of the neu protooncogene in the mammary epithelium  
665 of transgenic mice induces metastatic disease. *Proc Natl Acad Sci U S A* **89**,  
666 10578-10582 (1992).
- 667 56. Greulich, H. *et al.* Functional analysis of receptor tyrosine kinase mutations in  
668 lung cancer identifies oncogenic extracellular domain mutations of ERBB2. *Proc*  
669 *Natl Acad Sci U S A* **109**, 14476-14481 (2012).
- 670 57. Engelman, J.A. *et al.* Effective use of PI3K and MEK inhibitors to treat mutant  
671 Kras G12D and PIK3CA H1047R murine lung cancers. *Nat Med* **14**, 1351-1356  
672 (2008).
- 673 58. Trejo, C.L. *et al.* Mutationally activated PIK3CA(H1047R) cooperates with  
674 BRAF(V600E) to promote lung cancer progression. *Cancer Res* **73**, 6448-6461  
675 (2013).
- 676 59. Devarakonda, S. *et al.* Genomic Profiling of Lung Adenocarcinoma in Never-  
677 Smokers. *J Clin Oncol*, JCO2101691 (2021).
- 678 60. Sanchez-Vega, F. *et al.* Oncogenic Signaling Pathways in The Cancer Genome  
679 Atlas. *Cell* **173**, 321-337 e310 (2018).
- 680 61. Bailey, M.H. *et al.* Comprehensive Characterization of Cancer Driver Genes and  
681 Mutations. *Cell* **173**, 371-385 e318 (2018).
- 682 62. Yi, K.H. & Lauring, J. Recurrent AKT mutations in human cancers: functional  
683 consequences and effects on drug sensitivity. *Oncotarget* **7**, 4241-4251 (2016).
- 684 63. Dobashi, Y. *et al.* Diverse involvement of isoforms and gene aberrations of Akt in  
685 human lung carcinomas. *Cancer Sci* **106**, 772-781 (2015).
- 686 64. Arboleda, M.J. *et al.* Overexpression of AKT2/protein kinase Bbeta leads to up-  
687 regulation of beta1 integrins, increased invasion, and metastasis of human breast  
688 and ovarian cancer cells. *Cancer Res* **63**, 196-206 (2003).
- 689 65. Zhang, Y. *et al.* A Pan-Cancer Proteogenomic Atlas of PI3K/AKT/mTOR Pathway  
690 Alterations. *Cancer Cell* **31**, 820-832 e823 (2017).
- 691 66. Chaft, J.E. *et al.* Coexistence of PIK3CA and other oncogene mutations in lung  
692 adenocarcinoma-rationale for comprehensive mutation profiling. *Mol Cancer Ther*  
693 **11**, 485-491 (2012).
- 694 67. Dbouk, H.A. *et al.* Characterization of a tumor-associated activating mutation of  
695 the p110beta PI 3-kinase. *PLoS One* **8**, e63833 (2013).



- 696 68. Pazarentzos, E. *et al.* Oncogenic activation of the PI3-kinase p110beta isoform  
697 via the tumor-derived PIK3Cbeta(D1067V) kinase domain mutation. *Oncogene*  
698 **35**, 1198-1205 (2016).
- 699 69. Whale, A.D., Colman, L., Lensun, L., Rogers, H.L. & Shuttleworth, S.J.  
700 Functional characterization of a novel somatic oncogenic mutation of PIK3CB.  
701 *Signal Transduct Target Ther* **2**, 17063 (2017).
- 702 70. Liyasova, M.S., Ma, K. & Lipkowitz, S. Molecular pathways: cbl proteins in  
703 tumorigenesis and antitumor immunity-opportunities for cancer treatment. *Clin*  
704 *Cancer Res* **21**, 1789-1794 (2015).
- 705 71. Maertens, O. & Cichowski, K. An expanding role for RAS GTPase activating  
706 proteins (RAS GAPs) in cancer. *Adv Biol Regul* **55**, 1-14 (2014).
- 707 72. Ahmad, M.K., Abdollah, N.A., Shafie, N.H., Yusof, N.M. & Razak, S.R.A. Dual-  
708 specificity phosphatase 6 (DUSP6): a review of its molecular characteristics and  
709 clinical relevance in cancer. *Cancer Biol Med* **15**, 14-28 (2018).
- 710 73. Owens, D.M. & Keyse, S.M. Differential regulation of MAP kinase signalling by  
711 dual-specificity protein phosphatases. *Oncogene* **26**, 3203-3213 (2007).
- 712 74. Sato, K. *et al.* Fusion Kinases Identified by Genomic Analyses of Sporadic  
713 Microsatellite Instability-High Colorectal Cancers. *Clin Cancer Res* **25**, 378-389  
714 (2019).
- 715 75. Nonami, A. *et al.* Spred-1 negatively regulates interleukin-3-mediated  
716 ERK/mitogen-activated protein (MAP) kinase activation in hematopoietic cells. *J*  
717 *Biol Chem* **279**, 52543-52551 (2004).
- 718 76. McClatchey, A.I. & Cichowski, K. SPRED proteins provide a NF-ty link to Ras  
719 suppression. *Genes Dev* **26**, 1515-1519 (2012).
- 720 77. Hanafusa, H., Torii, S., Yasunaga, T. & Nishida, E. Sprouty1 and Sprouty2  
721 provide a control mechanism for the Ras/MAPK signalling pathway. *Nat Cell Biol*  
722 **4**, 850-858 (2002).
- 723 78. Yusoff, P. *et al.* Sprouty2 inhibits the Ras/MAP kinase pathway by inhibiting the  
724 activation of Raf. *J Biol Chem* **277**, 3195-3201 (2002).
- 725 79. Kim, H.J. & Bar-Sagi, D. Modulation of signalling by Sprouty: a developing story.  
726 *Nat Rev Mol Cell Biol* **5**, 441-450 (2004).
- 727 80. Chakravarty, D. *et al.* OncoKB: A Precision Oncology Knowledge Base. *JCO*  
728 *Precis Oncol* **2017** (2017).
- 729 81. Liu, C. *et al.* Mosaic analysis with double markers reveals tumor cell of origin in  
730 glioma. *Cell* **146**, 209-221 (2011).
- 731 82. Zhu, Y. *et al.* Ablation of NF1 function in neurons induces abnormal development  
732 of cerebral cortex and reactive gliosis in the brain. *Genes Dev* **15**, 859-876  
733 (2001).
- 734 83. Madisen, L. *et al.* A robust and high-throughput Cre reporting and  
735 characterization system for the whole mouse brain. *Nat Neurosci* **13**, 133-140  
736 (2010).
- 737 84. Chiou, S.H. *et al.* Pancreatic cancer modeling using retrograde viral vector  
738 delivery and in vivo CRISPR/Cas9-mediated somatic genome editing. *Genes*  
739 *Dev* **29**, 1576-1585 (2015).

- 740 85. Okawa, H. *et al.* Hepatocyte-specific deletion of the keap1 gene activates Nrf2  
741 and confers potent resistance against acute drug toxicity. *Biochem Biophys Res*  
742 *Commun* **339**, 79-88 (2006).
- 743 86. Bardeesy, N. *et al.* Loss of the Lkb1 tumour suppressor provokes intestinal  
744 polyposis but resistance to transformation. *Nature* **419**, 162-167 (2002).
- 745 87. Jonkers, J. *et al.* Synergistic tumor suppressor activity of BRCA2 and p53 in a  
746 conditional mouse model for breast cancer. *Nat Genet* **29**, 418-425 (2001).
- 747 88. Rogers, Z.N. *et al.* A quantitative and multiplexed approach to uncover the fitness  
748 landscape of tumor suppression in vivo. *Nat Methods* **14**, 737-742 (2017).
- 749 89. Rogers, Z.N. *et al.* Mapping the in vivo fitness landscape of lung adenocarcinoma  
750 tumor suppression in mice. *Nat Genet* **50**, 483-486 (2018).
- 751 90. Cai, H., *et al.* A functional taxonomy of tumor suppression in oncogenic KRAS-  
752 driven lung cancer. *Under consideration* (2021).
- 753 91. Murray, C.W. *et al.* An LKB1-SIK Axis Suppresses Lung Tumor Growth and  
754 Controls Differentiation. *Cancer Discov* **9**, 1590-1605 (2019).
- 755 92. Orr, H.A. Fitness and its role in evolutionary genetics. *Nat Rev Genet* **10**, 531-  
756 539 (2009).
- 757 93. J.B.S., H. The mathematical theory of natural and artificial selection.  
758 *Mathematical Proceedings of the Cambridge Philosophical Society* **23**, 607-615  
759 (1927).
- 760 94. Geraldine A. Van der Auwera, B.D.O.C. *Genomics in the Cloud*. (2020).
- 761 95. McLaren, W. *et al.* The Ensembl Variant Effect Predictor. *Genome Biol* **17**, 122  
762 (2016).
- 763 96. Fedchenko, N. & Reifenrath, J. Different approaches for interpretation and  
764 reporting of immunohistochemistry analysis results in the bone tissue - a review.  
765 *Diagn Pathol* **9**, 221 (2014).
- 766 97. Feoktistova, M., Geserick, P. & Leverkus, M. Crystal Violet Assay for  
767 Determining Viability of Cultured Cells. *Cold Spring Harb Protoc* **2016**, pdb  
768 prot087379 (2016).
- 769 98. Nichols, R.J. *et al.* RAS nucleotide cycling underlies the SHP2 phosphatase  
770 dependence of mutant BRAF-, NF1- and RAS-driven cancers. *Nat Cell Biol* **20**,  
771 1064-1073 (2018).
- 772 99. Ianevski, A., Giri, A.K. & Aittokallio, T. SynergyFinder 2.0: visual analytics of  
773 multi-drug combination synergies. *Nucleic Acids Res* **48**, W488-W493 (2020).
- 774 100. Loewe, S. The problem of synergism and antagonism of combined drugs.  
775 *Arzneimittelforschung* **3**, 285-290 (1953).
- 776 101. Dobin, A. *et al.* STAR: ultrafast universal RNA-seq aligner. *Bioinformatics* **29**, 15-  
777 21 (2013).
- 778 102. Li, B. & Dewey, C.N. RSEM: accurate transcript quantification from RNA-Seq  
779 data with or without a reference genome. *BMC Bioinformatics* **12**, 323 (2011).
- 780 103. Sonesson, C., Love, M.I. & Robinson, M.D. Differential analyses for RNA-seq:  
781 transcript-level estimates improve gene-level inferences. *F1000Res* **4**, 1521  
782 (2015).
- 783 104. Love, M.I., Huber, W. & Anders, S. Moderated estimation of fold change and  
784 dispersion for RNA-seq data with DESeq2. *Genome Biol* **15**, 550 (2014).

- 785 105. Subramanian, A. *et al.* Gene set enrichment analysis: a knowledge-based  
786 approach for interpreting genome-wide expression profiles. *Proc Natl Acad Sci U*  
787 *S A* **102**, 15545-15550 (2005).
- 788 106. Hanzelmann, S., Castelo, R. & Guinney, J. GSVA: gene set variation analysis for  
789 microarray and RNA-seq data. *BMC Bioinformatics* **14**, 7 (2013).
- 790
